# Supplementary material for: Role of DNA Methylation and Epigenetic Silencing of HAND2 in Endometrial Cancer Development
Source: PLoS Med. 2013 Nov 12;10(11):e1001551. doi: 10.1371/journal.pmed.1001551 (PMC3825654; doi:10.1371/journal.pmed.1001551)
Supplement: Table S3 — HAND2 methylation in vaginal swabs from women with postmenopausal bleeding (Set 4). (XLS) [file pmed.1001551.s015.xls]

## Sheet: table S3 
Supplementary table S3: HAND2 Methylation in vaginal swabs from women with postmenopausal bleeding (Set 4). The age of the patient, the status (cancer-free or cancer) and the methylation status (MethyLight; PMR, Percentage of fully Methylated Reference) is shown.
AGE (years)	STATUS	HAND2 methylation (PMR)
58.3444	cancer-free	0.00408183
55.4583	cancer-free	0.0978814
44.8222	cancer-free	0.115002
68.0139	cancer-free	0.121743
70.7361	cancer-free	0.143869
67.075	cancer-free	0.147599
66.8611	cancer-free	0.15097
58.5806	cancer-free	0.164424
63.5722	cancer-free	0.235068
71.0611	cancer-free	0.250165
71.2361	cancer-free	0.261488
60.9944	cancer-free	0.438803
81.7333	cancer-free	0.470748
63.0444	cancer-free	0.525039
77.3611	cancer-free	0.693699
58.0861	cancer-free	0.741745
61.0778	cancer-free	0.773891
50.6472	stage 1A endometrial cancer	0.0149002
63.525	stage 1A endometrial cancer	0.350979
74.1778	stage 1A endometrial cancer	0.489457
63.7	stage 1A endometrial cancer	0.722454
49.0111	stage 1A endometrial cancer	1.10889
69.8444	stage 1A endometrial cancer	1.20198
69.3583	stage 1A endometrial cancer	1.3617
45.275	stage 1A endometrial cancer	2.20259
62.3	stage 1A endometrial cancer	2.20912
83.9361	stage 1A endometrial cancer	2.75556
71.4444	stage 1A endometrial cancer	3.71342
76.6528	stage 1A endometrial cancer	6.52446
57.3306	stage 1A endometrial cancer	7.40814
74.8028	stage 1A endometrial cancer	12.75
55.0472	stage 1A endometrial cancer	23.0106
69.0556	stage 1A endometrial cancer	34.3019
56.8528	stage 1A endometrial cancer	37.007
71.9222	stage 1A endometrial cancer	59.7347
64.5944	stage 1B endometrial cancer	0.257089
81.0639	stage 1B endometrial cancer	0.792691
61.925	stage 1B endometrial cancer	1.45108
82.4806	stage 1B endometrial cancer	2.15449
54.6917	stage 1B endometrial cancer	3.72332
73.0556	stage 1B endometrial cancer	7.66145
78.3639	stage 1B endometrial cancer	16.7883
74.5306	stage 1B endometrial cancer	36.3916
75.5222	stage 2 endometrial cancer	7.61651
41.2722	stage 2 endometrial cancer	7.6795
74.0806	stage 2 endometrial cancer	30.1631
48.35	stage 3 endometrial cancer	10.1243
52.3611	stage 3 endometrial cancer	55.3565
