# Supplementary material for: Role of DNA Methylation and Epigenetic Silencing of HAND2 in Endometrial Cancer Development
Source: PLoS Med. 2013 Nov 12;10(11):e1001551. doi: 10.1371/journal.pmed.1001551 (PMC3825654; doi:10.1371/journal.pmed.1001551)
Supplement: Table S6 — Ranked list of genes hypermethylated in cancerous compared to normal endometrium. (XLS) [file pmed.1001551.s018.xls]

## Sheet: table S6
Supplementary table S6: Ranked list of genes hypermethylated in cancerous compared to normal endometrium: A logistic regression approach was used to model the association between endometrial cancer status (cancers versus normals - samples described in Supplementary table S1) and the CpG β-value methylation profile. To correct for multiple testing, we estimated the false discovery rate (FDR) using…
geneID	Illum Identifier	coefficient	standard deviation	t value	p value	q value	mean methylation β value normal endometrium	mean methylation β value endometrial cancer	methylation difference	SUZ12 Occupancy	Eed Occupancy	H3K27me3 Occupancy
GPR75	cg19664945	1.39736	0.121066	11.5422	5.14461e-19	1.18114e-14	0.197078	0.691477	0.494399	No	No	No
ADCY3	cg04348872	3.04327	0.296627	10.2596	1.7592e-16	2.01945e-12	0.687196	0.880724	0.193528	No	No	No
TNS3	cg06871974	1.5152	0.156994	9.65127	2.90637e-15	1.57733e-11	0.431927	0.820991	0.389064	No	No	No
WFIKKN1	cg10478221	1.87251	0.194747	9.61512	3.43514e-15	1.57733e-11	0.363388	0.658129	0.29474	No	No	No
ZNF454	cg23037403	1.29073	0.134033	9.62995	3.20758e-15	1.57733e-11	0.155424	0.608202	0.452778	No	No	No
GPR75	cg14832904	1.27746	0.134704	9.48351	6.31548e-15	2.41659e-11	0.318681	0.775859	0.457178	No	No	No
FLJ46831	cg19884262	1.17715	0.124773	9.43435	7.9293e-15	2.60066e-11	0.153801	0.626339	0.472539	NA	NA	NA
CBLN4	cg25993718	1.27762	0.139086	9.18583	2.50743e-14	7.19592e-11	0.169919	0.595563	0.425645	Yes	Yes	Yes
DPYS	cg10303487	1.02399	0.113859	8.99346	6.11614e-14	1.27653e-10	0.157947	0.651105	0.493158	No	No	No
HSD17B3	cg11554937	2.90728	0.32184	9.03331	5.08467e-14	1.27653e-10	0.674601	0.864651	0.19005	No	No	No
DKFZp434I1020	cg13535217	2.5287	0.280909	9.00186	5.88266e-14	1.27653e-10	0.55441	0.744752	0.190342	Yes	No	No
ADCY7	cg13851211	3.46026	0.389159	8.89165	9.80539e-14	1.73169e-10	0.776934	0.923554	0.14662	No	No	No
NEF3	cg23290344	1.36403	0.153162	8.90579	9.18305e-14	1.73169e-10	0.304565	0.709551	0.404986	Yes	Yes	Yes
WT1	cg01693350	1.70234	0.195658	8.70059	2.37725e-13	3.89847e-10	0.450832	0.758427	0.307595	Yes	Yes	Yes
CDO1	cg12880658	1.07306	0.124001	8.65363	2.95513e-13	4.52307e-10	0.125407	0.644546	0.519139	No	No	No
SORCS3	cg16787600	0.917609	0.106369	8.6267	3.34777e-13	4.80377e-10	0.193007	0.708431	0.515424	Yes	Yes	Yes
GPR103	cg10114327	1.22611	0.142921	8.57892	4.1771e-13	5.64122e-10	0.185677	0.553845	0.368168	Yes	Yes	No
ZNF454	cg03355526	1.15114	0.136921	8.40736	9.24297e-13	1.17893e-09	0.278805	0.722649	0.443845	No	No	No
HAND2	cg01580681	1.24357	0.148699	8.36303	1.13472e-12	1.37114e-09	0.252257	0.644627	0.39237	Yes	Yes	Yes
ZFP41	cg12680609	1.2545	0.151704	8.26938	1.74964e-12	2.00847e-09	0.171018	0.599131	0.428113	No	No	No
SOX1	cg06675478	1.9801	0.240124	8.24617	1.94767e-12	2.12934e-09	0.351886	0.585111	0.233225	Yes	Yes	No
SLC2A14	cg05521696	1.33802	0.162724	8.22267	2.1711e-12	2.26571e-09	0.140312	0.525105	0.384793	No	No	No
SKIP	cg06092815	1.35951	0.165921	8.19374	2.48146e-12	2.3738e-09	0.23169	0.595579	0.363889	NA	NA	NA
SSTR4	cg17586860	1.13993	0.139073	8.19663	2.44861e-12	2.3738e-09	0.230451	0.639617	0.409166	No	No	No
ZFP42	cg06274159	1.07472	0.132967	8.08264	4.14409e-12	3.80572e-09	0.245743	0.720343	0.474599	No	No	No
NFE2	cg23140706	2.04021	0.25285	8.06884	4.41627e-12	3.89968e-09	0.447538	0.694804	0.247266	No	No	No
ZNF540	cg27389185	1.85148	0.232218	7.97301	6.86902e-12	5.84088e-09	0.30968	0.590335	0.280655	No	No	No
GALR1	cg04534765	0.787438	0.0998367	7.88726	1.01937e-11	8.07016e-09	0.08037	0.609378	0.529008	NA	NA	NA
DPT	cg26220985	1.58928	0.20133	7.89391	9.88644e-12	8.07016e-09	0.414327	0.709766	0.295439	No	No	No
FLJ46831	cg13929328	1.18104	0.150174	7.86448	1.13197e-11	8.66288e-09	0.226307	0.608251	0.381944	NA	NA	NA
PTPN20B	cg02222362	1.55822	0.204239	7.62939	3.33005e-11	2.46625e-08	0.512039	0.816132	0.304092	No	No	No
WT1	cg16501028	1.41894	0.186588	7.60466	3.72919e-11	2.67554e-08	0.426034	0.780744	0.35471	Yes	Yes	Yes
VSX1	cg06151165	0.997376	0.131557	7.58131	4.14977e-11	2.80216e-08	0.104546	0.517138	0.412592	Yes	Yes	Yes
GRIK3	cg06722633	0.774617	0.102124	7.58504	4.07963e-11	2.80216e-08	0.12915	0.642205	0.513055	Yes	Yes	Yes
FUT5	cg14173523	1.72641	0.2282	7.56535	4.46417e-11	2.92833e-08	0.353736	0.638539	0.284804	NA	NA	NA
VSIG2	cg21929875	1.07716	0.143172	7.52354	5.40448e-11	3.44666e-08	0.299823	0.710764	0.410941	Yes	Yes	No
ADRA1A	cg17963840	1.22397	0.163172	7.50115	5.98647e-11	3.71464e-08	0.194826	0.555893	0.361067	Yes	Yes	Yes
RIC3	cg08383315	0.994972	0.133062	7.47752	6.6686e-11	3.96645e-08	0.111326	0.552876	0.44155	No	No	No
BOLL	cg17560332	1.28243	0.171613	7.47281	6.81377e-11	3.96645e-08	0.186568	0.551	0.364433	No	No	No
MYO3A	cg23771603	1.21491	0.162644	7.46972	6.91057e-11	3.96645e-08	0.22802	0.594748	0.366728	No	No	No
AJAP1	cg17525406	0.702227	0.0941818	7.45607	7.35454e-11	4.11831e-08	0.191106	0.640484	0.449377	No	No	No
PRAC	cg12374721	1.34086	0.180907	7.41188	8.99676e-11	4.91795e-08	0.265798	0.628013	0.362216	Yes	Yes	Yes
INHBE	cg22630748	1.45003	0.196039	7.39664	9.64382e-11	5.14906e-08	0.441913	0.687221	0.245308	No	No	No
KCNA6	cg26162582	0.899835	0.12224	7.36122	1.13324e-10	5.91312e-08	0.201026	0.644088	0.443062	No	No	No
CHAD	cg06958829	0.991189	0.134908	7.34713	1.20827e-10	6.16453e-08	0.166138	0.655886	0.489748	No	No	Yes
WT1	cg04456238	1.41158	0.192378	7.33753	1.26224e-10	6.26637e-08	0.316117	0.680933	0.364816	Yes	Yes	Yes
CPA1	cg15154229	1.60018	0.218187	7.33398	1.28282e-10	6.26637e-08	0.421862	0.680508	0.258646	No	No	No
WDR8	cg26128092	1.07987	0.147442	7.32403	1.34219e-10	6.41979e-08	0.192463	0.572634	0.380171	Yes	Yes	Yes
ZNF154	cg21790626	1.01642	0.139116	7.30627	1.4551e-10	6.8178e-08	0.235353	0.690124	0.454771	No	No	No
CHAD	cg06818777	1.18022	0.16172	7.29794	1.51127e-10	6.93938e-08	0.104462	0.511099	0.406638	No	No	Yes
CADPS	cg21458907	0.891618	0.122718	7.26558	1.75057e-10	7.729e-08	0.108188	0.547715	0.439527	No	No	No
ZNF96	cg02622316	1.09608	0.151055	7.25615	1.82718e-10	7.91505e-08	0.113789	0.548604	0.434815	No	No	No
ALOX12	cg08946332	1.32994	0.183544	7.2459	1.91424e-10	8.13859e-08	0.46417	0.76697	0.3028	NA	NA	NA
PYGO1	cg23412777	1.49735	0.206973	7.23452	2.01565e-10	8.41395e-08	0.335195	0.623342	0.288148	No	No	No
KCNA6	cg03240509	1.11344	0.154076	7.22656	2.08981e-10	8.41744e-08	0.276491	0.626676	0.350185	No	No	No
CART	cg20798152	1.54458	0.213692	7.22808	2.07546e-10	8.41744e-08	0.313989	0.607061	0.293071	No	No	No
ELA2B	cg25021182	2.67825	0.370925	7.22045	2.14852e-10	8.5047e-08	0.600811	0.775017	0.174205	No	No	No
DPYSL4	cg12109455	1.06289	0.147338	7.21396	2.21278e-10	8.61062e-08	0.120736	0.473751	0.353014	No	No	No
KIAA1944	cg03469054	0.984505	0.13679	7.19719	2.3875e-10	8.90076e-08	0.119398	0.509618	0.390219	No	No	No
C1S	cg13053396	1.93914	0.269486	7.19571	2.40365e-10	8.90076e-08	0.412926	0.647714	0.234788	No	No	No
PROZ	cg25734864	1.40096	0.194519	7.20215	2.3345e-10	8.90076e-08	0.39778	0.704292	0.306512	No	No	No
PSCA	cg13446199	1.81229	0.252763	7.16992	2.70158e-10	9.8452e-08	0.343184	0.598938	0.255754	No	No	No
CPXM2	cg09619146	1.14382	0.159868	7.15478	2.89325e-10	1.03789e-07	0.28066	0.592416	0.311756	No	No	No
SOX14	cg03811478	1.8174	0.254717	7.13495	3.16501e-10	1.11792e-07	0.22866	0.472327	0.243667	Yes	Yes	Yes
DCC	cg25266232	1.28219	0.180082	7.12002	3.38613e-10	1.1779e-07	0.121136	0.444598	0.323462	Yes	Yes	Yes
ADHFE1	cg01988129	0.748499	0.105464	7.09721	3.75403e-10	1.28577e-07	0.15889	0.66143	0.502541	No	No	No
SERPINF1	cg24214470	1.49489	0.210725	7.09404	3.80823e-10	1.28577e-07	0.439722	0.676569	0.236847	NA	NA	NA
ZNF540	cg03975694	1.34445	0.190466	7.05875	4.46631e-10	1.47156e-07	0.31566	0.654631	0.33897	No	No	No
PLXNB1	cg09837648	0.97556	0.138226	7.05774	4.4867e-10	1.47156e-07	0.314743	0.670196	0.355453	No	No	No
KCNA1	cg08832227	1.06579	0.151453	7.03714	4.92379e-10	1.59217e-07	0.355226	0.763685	0.408459	Yes	Yes	Yes
CDH8	cg11323198	0.809183	0.11532	7.01687	5.39511e-10	1.69678e-07	0.192531	0.658442	0.465911	NA	NA	NA
ADPRHL1	cg14845091	1.52153	0.217201	7.00517	5.68728e-10	1.76449e-07	0.465118	0.702426	0.237309	No	No	No
PABPC5	cg04875162	1.11923	0.160522	6.97246	6.59028e-10	2.01389e-07	0.29068	0.645102	0.354422	No	No	No
SPAG6	cg06908778	1.21585	0.174443	6.9699	6.66657e-10	2.01389e-07	0.27715	0.648988	0.371838	Yes	Yes	Yes
PHOX2A	cg18722841	1.15025	0.165637	6.94439	7.47734e-10	2.22948e-07	0.172365	0.575919	0.403555	Yes	Yes	Yes
MGC21830	cg25665528	2.10589	0.303499	6.93871	7.67102e-10	2.25791e-07	0.545285	0.748764	0.203479	NA	NA	NA
HS3ST2	cg19064258	0.872801	0.126403	6.9049	8.92974e-10	2.59513e-07	0.102566	0.4886	0.386034	Yes	No	Yes
SFTPB	cg03380645	1.92615	0.279782	6.88446	9.78797e-10	2.80899e-07	0.566185	0.779579	0.213393	No	No	No
K6IRS2	cg20050826	1.14295	0.16674	6.85469	1.11864e-09	3.17069e-07	0.172614	0.560633	0.38802	No	No	No
NTRK1	cg00626119	1.78173	0.260976	6.82717	1.26552e-09	3.54326e-07	0.336098	0.594202	0.258104	Yes	Yes	Yes
NMBR	cg08109815	1.28805	0.188945	6.81708	1.32401e-09	3.66237e-07	0.23886	0.546431	0.307571	No	No	No
SPDY1	cg04786857	1.15625	0.169845	6.80767	1.38097e-09	3.77443e-07	0.197633	0.580912	0.383279	No	No	No
ATP6V0D2	cg00319692	1.35911	0.199741	6.80436	1.40161e-09	3.78579e-07	0.280856	0.555267	0.274411	No	No	No
HOXD10	cg21591742	1.24562	0.183522	6.78728	1.51291e-09	4.03888e-07	0.242318	0.589768	0.347451	NA	NA	NA
ADCY8	cg13912117	0.777815	0.114694	6.78168	1.55126e-09	4.09367e-07	0.083074	0.575331	0.492257	Yes	Yes	Yes
SKIP	cg04072323	0.908063	0.134224	6.7653	1.66908e-09	4.35455e-07	0.139978	0.525066	0.385087	NA	NA	NA
PRDM14	cg01295203	0.932503	0.138165	6.7492	1.79361e-09	4.47598e-07	0.131127	0.620371	0.489244	No	Yes	No
DCC	cg02624705	1.07357	0.159001	6.75195	1.7717e-09	4.47598e-07	0.134852	0.505326	0.370474	Yes	Yes	Yes
PHOX2A	cg08876932	1.13332	0.167888	6.75049	1.78333e-09	4.47598e-07	0.100597	0.499416	0.398819	Yes	Yes	Yes
CILP	cg20225681	3.04255	0.450559	6.75283	1.76472e-09	4.47598e-07	0.784443	0.902541	0.118098	No	No	No
SOX1	cg22303211	1.8874	0.280975	6.71733	2.06782e-09	5.10477e-07	0.322687	0.509708	0.187021	Yes	Yes	No
PENK	cg04598121	1.63851	0.244307	6.70679	2.16737e-09	5.29362e-07	0.33095	0.610883	0.279934	Yes	Yes	Yes
GAD2	cg04599297	1.11267	0.166343	6.68897	2.34654e-09	5.6709e-07	0.201453	0.543078	0.341625	Yes	Yes	Yes
WT1	cg16463460	1.39736	0.209795	6.66059	2.6626e-09	6.36769e-07	0.264122	0.592591	0.328469	Yes	Yes	Yes
OLIG2	cg10217445	1.09068	0.163927	6.65344	2.74869e-09	6.50582e-07	0.181163	0.510202	0.329039	Yes	Yes	Yes
EOMES	cg15540820	1.1189	0.16831	6.64789	2.81749e-09	6.60061e-07	0.207769	0.611012	0.403243	Yes	Yes	Yes
GGTLA1	cg15448245	1.56699	0.236155	6.63542	2.97812e-09	6.90645e-07	0.293131	0.545239	0.252107	No	No	No
DPYS	cg20774846	1.19268	0.179822	6.63252	3.01669e-09	6.92593e-07	0.375625	0.69155	0.315925	No	No	No
DCC	cg00399483	0.963017	0.145804	6.60486	3.41118e-09	7.31741e-07	0.16393	0.553207	0.389277	Yes	Yes	Yes
WT1	cg04096767	1.3757	0.207971	6.61486	3.2631e-09	7.31741e-07	0.377573	0.67725	0.299677	Yes	Yes	Yes
DCC	cg04272086	1.2326	0.186475	6.60998	3.33461e-09	7.31741e-07	0.15455	0.469806	0.315256	Yes	Yes	Yes
WDR52	cg07054641	1.2432	0.187867	6.61747	3.22542e-09	7.31741e-07	0.378943	0.721198	0.342255	No	No	No
MYO3A	cg08441170	0.84843	0.128473	6.60395	3.42505e-09	7.31741e-07	0.190249	0.653298	0.463048	No	No	No
LYPD5	cg12768605	1.09515	0.165861	6.60283	3.44218e-09	7.31741e-07	0.173615	0.561842	0.388228	No	No	No
FLJ90650	cg25044651	1.00576	0.152279	6.60471	3.41352e-09	7.31741e-07	0.200566	0.562891	0.362325	No	No	No
TCERG1L	cg03943081	0.784027	0.11893	6.59232	3.60656e-09	7.43797e-07	0.133938	0.553123	0.419185	No	No	No
EDNRB	cg12120741	1.51516	0.229776	6.59407	3.5786e-09	7.43797e-07	0.33684	0.54266	0.20582	No	No	No
HSPA12B	cg15127733	1.15954	0.175981	6.58897	3.66051e-09	7.43797e-07	0.240244	0.58049	0.340246	No	No	No
NTRK1	cg25827666	1.55068	0.235108	6.59562	3.55418e-09	7.43797e-07	0.449359	0.734839	0.28548	Yes	Yes	Yes
SLCO1C1	cg04091078	1.66877	0.254374	6.56029	4.15707e-09	8.02025e-07	0.325199	0.561763	0.236564	No	No	No
DRD5	cg09936561	1.18719	0.180845	6.56469	4.07683e-09	8.02025e-07	0.21351	0.519465	0.305955	Yes	Yes	Yes
KIAA1944	cg13234863	1.07219	0.163378	6.5626	4.11474e-09	8.02025e-07	0.175693	0.519073	0.34338	No	No	No
SLC2A14	cg13323752	0.902682	0.137531	6.56349	4.0985e-09	8.02025e-07	0.077143	0.49626	0.419117	No	No	No
PTPN20B	cg16192575	1.08321	0.165115	6.56031	4.15665e-09	8.02025e-07	0.348001	0.718959	0.370958	No	No	No
AJAP1	cg20959866	0.759794	0.115871	6.55725	4.21352e-09	8.06142e-07	0.181487	0.61719	0.435703	No	No	No
GPR103	cg00015770	0.832198	0.127036	6.55086	4.33453e-09	8.15698e-07	0.157031	0.537748	0.380717	Yes	Yes	No
HLA-G	cg21529533	0.879049	0.134155	6.55251	4.3029e-09	8.15698e-07	0.0432543	0.48002	0.436766	No	Yes	No
GALR1	cg00662556	0.873854	0.133597	6.54096	4.52878e-09	8.45324e-07	0.120887	0.542465	0.421578	NA	NA	NA
FERD3L	cg25691167	0.839027	0.128737	6.51736	5.02749e-09	9.30844e-07	0.186102	0.591835	0.405733	No	Yes	Yes
PRLHR	cg16196812	1.40863	0.216919	6.49378	5.57993e-09	1.02266e-06	0.261946	0.493077	0.231131	Yes	Yes	Yes
LEP	cg19594666	1.33974	0.206352	6.49247	5.6125e-09	1.02266e-06	0.394739	0.716455	0.321716	No	No	No
SIX6	cg19456540	0.776153	0.119598	6.48968	5.68204e-09	1.02718e-06	0.0992938	0.589326	0.490032	Yes	Yes	Yes
C15orf21	cg08057475	1.73865	0.269376	6.45435	6.64111e-09	1.18995e-06	0.401476	0.616935	0.215459	NA	NA	NA
CACNA1A	cg22187630	1.05053	0.162846	6.45107	6.73789e-09	1.18995e-06	0.166617	0.540954	0.374337	Yes	No	Yes
PTPRT	cg13168820	0.889969	0.13814	6.44251	6.99734e-09	1.22634e-06	0.0764423	0.481724	0.405282	Yes	Yes	Yes
CRMP1	cg03544320	0.747123	0.116386	6.41935	7.74903e-09	1.34779e-06	0.0917961	0.455282	0.363486	Yes	No	Yes
HIST1H3E	cg07922606	1.4412	0.224663	6.41495	7.90073e-09	1.35263e-06	0.587088	0.854389	0.267301	No	Yes	No
ALS2CR11	cg15780361	1.2683	0.197679	6.41595	7.8659e-09	1.35263e-06	0.302055	0.619061	0.317007	No	No	No
TMEM86B	cg26457013	1.51035	0.235498	6.41343	7.95363e-09	1.35263e-06	0.634239	0.859908	0.225668	No	No	No
ALOX12	cg03760483	1.03002	0.16119	6.3901	8.81394e-09	1.47706e-06	0.316226	0.581654	0.265428	NA	NA	NA
PXDN	cg12164282	0.710919	0.111244	6.39062	8.79383e-09	1.47706e-06	0.215125	0.631219	0.416094	NA	NA	NA
VSIG2	cg02082342	1.43272	0.224305	6.38736	8.92046e-09	1.48048e-06	0.361809	0.617064	0.255255	Yes	Yes	No
WT1	cg05222924	0.917767	0.143709	6.38627	8.96336e-09	1.48048e-06	0.128631	0.563541	0.43491	Yes	Yes	Yes
ADAM12	cg13488201	0.677253	0.106149	6.3802	9.20604e-09	1.50971e-06	0.129848	0.605315	0.475467	Yes	No	No
S100A3	cg07426848	1.31663	0.206481	6.37651	9.35634e-09	1.52347e-06	0.381485	0.675547	0.294062	No	No	No
CKMT2	cg22979433	1.06739	0.167658	6.36646	9.77885e-09	1.58105e-06	0.170428	0.466237	0.295809	No	No	No
CDKN2A	cg09099744	0.936928	0.147545	6.35011	1.0507e-08	1.67519e-06	0.125745	0.587165	0.46142	NA	NA	NA
IGF2AS	cg25574024	0.864082	0.136733	6.31948	1.2018e-08	1.90289e-06	0.270363	0.665951	0.395588	Yes	Yes	Yes
NEF3	cg18267374	0.848946	0.134701	6.30242	1.29506e-08	2.0365e-06	0.141826	0.576778	0.434952	Yes	Yes	Yes
KCNK9	cg17834752	1	0.158763	6.29873	1.31616e-08	2.0556e-06	0.108382	0.484342	0.37596	No	No	No
SREBF1	cg14808739	1.88777	0.300831	6.27518	1.45909e-08	2.25577e-06	0.472408	0.660816	0.188407	No	No	No
ZNF135	cg16638540	0.701212	0.111757	6.27441	1.46397e-08	2.25577e-06	0.0743559	0.486673	0.412317	No	No	No
WT1	cg22533573	0.863785	0.137746	6.27084	1.48705e-08	2.27605e-06	0.0865403	0.534643	0.448103	Yes	Yes	Yes
MYOD1	cg18555440	1.21254	0.19394	6.25215	1.61362e-08	2.43728e-06	0.220874	0.53071	0.309835	Yes	Yes	Yes
SFTPB	cg26394380	1.42469	0.228161	6.24423	1.67043e-08	2.50659e-06	0.425944	0.67614	0.250197	No	No	No
ALDH1A3	cg21359747	1.13508	0.181912	6.23976	1.70334e-08	2.53938e-06	0.350403	0.71981	0.369407	No	No	No
TRH	cg01009664	1.19439	0.191763	6.22847	1.78936e-08	2.65042e-06	0.366126	0.693818	0.327693	Yes	Yes	Yes
PCDH11Y	cg22415432	1.04004	0.167071	6.22514	1.81554e-08	2.67195e-06	0.0837162	0.382356	0.29864	Yes	No	No
ZNF132	cg13877915	0.71635	0.115148	6.22115	1.84744e-08	2.70158e-06	0.122288	0.555157	0.432869	No	No	No
GRIN3A	cg18794577	0.704439	0.113282	6.21846	1.8692e-08	2.7161e-06	0.200197	0.65335	0.453153	Yes	Yes	Yes
SOX21	cg11208483	2.01305	0.324282	6.20773	1.95871e-08	2.81059e-06	0.268486	0.448908	0.180422	Yes	Yes	No
POU3F1	cg21243096	0.967754	0.156212	6.19512	2.06935e-08	2.9509e-06	0.142802	0.491461	0.348659	Yes	Yes	Yes
CARHSP1	cg04007936	1.64634	0.265901	6.19155	2.10175e-08	2.97861e-06	0.523236	0.745354	0.222118	No	No	No
KIAA0319L	cg15272684	1.65065	0.26671	6.18894	2.12579e-08	2.9942e-06	0.435043	0.629542	0.194498	No	No	No
C1orf114	cg08047907	0.82808	0.13413	6.17371	2.27155e-08	3.17999e-06	0.122719	0.521232	0.398513	No	No	No
ADPRHL1	cg00463202	1.62225	0.263536	6.15572	2.45634e-08	3.41785e-06	0.555129	0.761689	0.20656	No	No	No
NPTX2	cg00548268	0.999976	0.162735	6.14482	2.57547e-08	3.54068e-06	0.36489	0.665455	0.300564	No	Yes	No
DDO	cg20011134	1.09586	0.178339	6.14484	2.57524e-08	3.54068e-06	0.268776	0.514994	0.246217	No	No	No
CD226	cg13164537	1.15433	0.187971	6.14098	2.61879e-08	3.55764e-06	0.315577	0.646336	0.330759	No	No	No
ZNF471	cg24713204	1.25317	0.20403	6.14208	2.60638e-08	3.55764e-06	0.0936077	0.276891	0.183283	No	No	No
IRX2	cg26504021	0.966966	0.15765	6.13364	2.70367e-08	3.62999e-06	0.173918	0.563151	0.389232	No	No	No
KIF25	cg17001430	1.56245	0.254876	6.13024	2.74379e-08	3.66243e-06	0.483042	0.695125	0.212083	No	No	No
ADCYAP1	cg07376535	0.969588	0.158498	6.11734	2.90184e-08	3.85102e-06	0.105899	0.451089	0.345191	Yes	Yes	Yes
IL1R1	cg15233681	1.19197	0.195421	6.09952	3.13484e-08	4.10723e-06	0.275518	0.538669	0.263151	No	No	No
PROKR2	cg27114120	0.933101	0.153005	6.09851	3.14857e-08	4.10723e-06	0.157751	0.534408	0.376657	No	No	No
WT1	cg06516124	1.28174	0.210452	6.09043	3.26069e-08	4.22945e-06	0.152988	0.44639	0.293401	Yes	Yes	Yes
DGKI	cg06277657	0.86615	0.142334	6.08532	3.33367e-08	4.28548e-06	0.236744	0.518395	0.281651	Yes	Yes	Yes
PENK	cg24645221	1.08161	0.177756	6.0848	3.34122e-08	4.28548e-06	0.15174	0.498455	0.346715	Yes	Yes	Yes
GHSR	cg11812218	0.903223	0.148558	6.07993	3.41248e-08	4.35256e-06	0.0999473	0.538392	0.438444	Yes	Yes	Yes
EPB41L3	cg00027083	0.712258	0.117266	6.07387	3.50305e-08	4.44339e-06	0.133017	0.507112	0.374096	No	No	No
CX36	cg00792849	1.04089	0.171777	6.05957	3.72662e-08	4.70101e-06	0.162251	0.472912	0.310661	Yes	Yes	Yes
BOLL	cg10124201	1.96144	0.324354	6.04723	3.93081e-08	4.93149e-06	0.478561	0.655715	0.177154	No	No	No
AGT	cg19125606	1.2944	0.214893	6.02348	4.35518e-08	5.4342e-06	0.316125	0.552637	0.236512	No	No	No
ZNF154	cg08668790	1.17684	0.195438	6.02154	4.39175e-08	5.45021e-06	0.299971	0.641723	0.341752	No	No	No
OLFML3	cg17253459	1.23201	0.204679	6.01924	4.43569e-08	5.45205e-06	0.422065	0.696331	0.274266	No	No	No
NPAS4	cg22134325	1.11196	0.184971	6.01155	4.58515e-08	5.59942e-06	0.314402	0.604152	0.28975	Yes	Yes	Yes
BARHL2	cg17241310	0.942913	0.15717	5.99933	4.83319e-08	5.8711e-06	0.198475	0.591459	0.392984	Yes	Yes	Yes
FLJ39822	cg03464655	1.48315	0.247614	5.98977	5.03621e-08	6.08552e-06	0.378894	0.644108	0.265214	No	No	No
SGNE1	cg15787039	1.11556	0.186493	5.9818	5.2122e-08	6.2652e-06	0.21147	0.513298	0.301828	No	No	No
SH2D4B	cg26391080	1.24645	0.208525	5.97746	5.3104e-08	6.35e-06	0.341137	0.601619	0.260482	No	No	No
MRPL28	cg10805676	2.08996	0.350093	5.96972	5.49023e-08	6.53102e-06	0.689692	0.84299	0.153298	No	No	No
SLC25A18	cg18003231	1.52907	0.256639	5.95803	5.77303e-08	6.83203e-06	0.447825	0.674101	0.226276	No	No	No
GRM6	cg14859460	0.720102	0.120896	5.95639	5.81408e-08	6.84532e-06	0.127829	0.575884	0.448055	No	No	Yes
CDH13	cg08977371	1.06965	0.179933	5.94471	6.11317e-08	7.14952e-06	0.132737	0.406094	0.273357	Yes	No	No
SCRT1	cg13302823	1.17255	0.197269	5.94389	6.13473e-08	7.14952e-06	0.258379	0.456597	0.198219	No	No	No
SOX11	cg20008332	1.08655	0.183001	5.93739	6.3084e-08	7.28748e-06	0.159096	0.482704	0.323608	No	No	No
IRF4	cg12741420	0.94751	0.159592	5.93709	6.31659e-08	7.28748e-06	0.105773	0.448781	0.343008	No	No	Yes
DRD4	cg06825142	0.78271	0.13203	5.92829	6.55963e-08	7.52589e-06	0.122169	0.543314	0.421145	No	Yes	Yes
DCC	cg01839464	0.844627	0.142829	5.91357	6.9871e-08	7.94133e-06	0.199219	0.593382	0.394164	Yes	Yes	Yes
WIT-1	cg19718882	1.04554	0.176965	5.9082	7.14977e-08	8.08618e-06	0.178623	0.486646	0.308023	Yes	Yes	Yes
ASPN	cg26478992	1.72381	0.291827	5.90695	7.18793e-08	8.08949e-06	0.476347	0.650793	0.174445	No	No	No
PCDH8	cg20366906	1.026	0.17381	5.90301	7.31044e-08	8.18723e-06	0.24061	0.524086	0.283476	Yes	Yes	Yes
CARD11	cg26937500	0.997755	0.169089	5.90077	7.38072e-08	8.22582e-06	0.177192	0.461382	0.28419	No	No	No
C16orf30	cg17706173	0.909554	0.154222	5.89771	7.4782e-08	8.2942e-06	0.0859181	0.535671	0.449752	No	No	No
GLULD1	cg03352153	1.61115	0.273329	5.89454	7.58049e-08	8.36723e-06	0.385594	0.566214	0.180619	No	No	No
ZNF560	cg04062391	0.890341	0.151131	5.89119	7.68999e-08	8.44747e-06	0.126626	0.528901	0.402275	No	No	No
ATP8A2	cg12111714	1.40579	0.238694	5.88949	7.74599e-08	8.46848e-06	0.386216	0.638962	0.252745	No	No	No
CDH13	cg00806490	0.755218	0.12826	5.8882	7.78888e-08	8.475e-06	0.176831	0.558698	0.381867	Yes	No	No
LOC221091	cg25620220	1.17263	0.199478	5.87852	8.1183e-08	8.79178e-06	0.469227	0.718846	0.249619	No	No	No
MS4A10	cg07221454	1.3095	0.222919	5.87435	8.26439e-08	8.90796e-06	0.435625	0.706026	0.270402	No	No	No
SOX2	cg15105987	1.57141	0.267846	5.86684	8.53418e-08	9.15578e-06	0.315728	0.514482	0.198754	No	No	No
C7orf16	cg01353448	1.47206	0.251703	5.84838	9.23419e-08	9.8607e-06	0.392053	0.645584	0.253531	No	No	No
ORM2	cg00969271	1.73718	0.297474	5.83977	9.5798e-08	1.01824e-05	0.634966	0.802063	0.167097	No	No	No
NPY	cg12614105	1.1298	0.193534	5.83774	9.66332e-08	1.02238e-05	0.217858	0.519672	0.301814	No	No	No
CD300LG	cg13269964	1.61941	0.277754	5.83036	9.97219e-08	1.05022e-05	0.505166	0.716531	0.211365	No	No	No
GPR26	cg02757432	1.21557	0.208729	5.82368	1.02604e-07	1.07564e-05	0.370226	0.637891	0.267666	No	No	Yes
IGSF21	cg23349790	0.577452	0.0996709	5.79359	1.16627e-07	1.21159e-05	0.192528	0.658845	0.466317	Yes	Yes	Yes
ZNF677	cg16708981	0.822627	0.142035	5.79172	1.17559e-07	1.21576e-05	0.174809	0.628664	0.453855	No	No	No
DDR2	cg22740835	1.03454	0.179226	5.77225	1.27703e-07	1.31475e-05	0.240841	0.537249	0.296408	No	No	No
GATA4	cg02990612	1.5277	0.265676	5.75024	1.4021e-07	1.42435e-05	0.259825	0.452433	0.192608	Yes	Yes	Yes
ZNF135	cg21643361	1.0346	0.180056	5.74598	1.42766e-07	1.44393e-05	0.230817	0.470489	0.239672	No	No	No
GHSR	cg22459146	1.33823	0.233209	5.73833	1.4747e-07	1.48306e-05	0.26546	0.529445	0.263986	Yes	Yes	Yes
NR1I3	cg25214346	1.23027	0.214422	5.7376	1.47926e-07	1.48306e-05	0.42218	0.690857	0.268677	No	No	No
KIAA0240	cg15679095	1.54543	0.269475	5.73494	1.49602e-07	1.49333e-05	0.395206	0.622011	0.226805	NA	NA	NA
NR2E1	cg03958979	0.966939	0.168902	5.72485	1.56141e-07	1.55186e-05	0.390404	0.704458	0.314054	No	Yes	Yes
WT1	cg13301003	1.45608	0.255111	5.70765	1.67924e-07	1.65464e-05	0.310197	0.562198	0.252	Yes	Yes	Yes
DNAJC15	cg00131557	1.77051	0.310465	5.70278	1.71424e-07	1.68191e-05	0.421591	0.600206	0.178615	No	No	No
CLIPR-59	cg00819362	1.87723	0.329469	5.69775	1.75108e-07	1.70624e-05	0.62856	0.801098	0.172538	No	No	No
TEK	cg04995717	1.87593	0.329263	5.69737	1.7539e-07	1.70624e-05	0.3352	0.50311	0.167909	No	No	No
TBX5	cg21907579	1.20175	0.210998	5.69557	1.76726e-07	1.71198e-05	0.220099	0.51287	0.292772	Yes	Yes	Yes
POU4F2	cg13262687	0.997385	0.175204	5.69272	1.7887e-07	1.72547e-05	0.203427	0.53918	0.335753	Yes	Yes	Yes
SORCS1	cg16415058	0.88435	0.155402	5.69073	1.80379e-07	1.73078e-05	0.158607	0.505261	0.346654	Yes	Yes	Yes
ATP8A2	cg18236477	1.12388	0.197518	5.69001	1.80928e-07	1.73078e-05	0.398164	0.668831	0.270668	No	No	No
ISLR	cg17258195	1.19051	0.209297	5.68811	1.82388e-07	1.7375e-05	0.270968	0.547857	0.276889	No	No	No
ZIM2	cg02162069	2.0831	0.366515	5.68354	1.85939e-07	1.76402e-05	0.685277	0.834074	0.148797	No	No	No
CYYR1	cg10238818	1.04772	0.184503	5.67861	1.89852e-07	1.79373e-05	0.198879	0.498021	0.299142	No	No	No
ADRA1A	cg22461835	1.01478	0.178886	5.67277	1.94585e-07	1.83091e-05	0.117681	0.423008	0.305328	Yes	Yes	Yes
FLJ90650	cg15489294	0.928786	0.1638	5.67025	1.96665e-07	1.84293e-05	0.232577	0.578364	0.345788	No	No	No
HCA112	cg26385222	0.775482	0.136842	5.66699	1.99389e-07	1.85397e-05	0.162004	0.553638	0.391634	No	No	No
ZNF177	cg09643544	0.880397	0.155557	5.65962	2.05682e-07	1.90411e-05	0.242121	0.659964	0.417843	No	No	No
AMT	cg20191453	0.796943	0.140999	5.65213	2.12285e-07	1.95734e-05	0.186909	0.58117	0.394261	No	No	No
SYCP1	cg18087477	1.4684	0.260409	5.63882	2.24523e-07	2.04554e-05	0.473771	0.713744	0.239973	NA	NA	NA
NETO1	cg26186727	1.09388	0.193965	5.63958	2.23804e-07	2.04554e-05	0.3308	0.627268	0.296468	No	No	No
CTSK	cg20802392	1.13254	0.200882	5.63782	2.25471e-07	2.04606e-05	0.319574	0.602711	0.283137	No	No	No
RSHL1	cg02218324	1.63108	0.289614	5.63192	2.31138e-07	2.08922e-05	0.567915	0.767557	0.199642	No	No	No
CTRL	cg04413148	1.54089	0.275286	5.59743	2.67189e-07	2.38689e-05	0.60825	0.787508	0.179258	No	No	No
DLG4	cg12228229	1.75283	0.31472	5.56949	3.00393e-07	2.6628e-05	0.615477	0.789301	0.173823	No	No	No
EPHA5	cg18420965	0.732864	0.131746	5.56271	3.09043e-07	2.72893e-05	0.193627	0.587548	0.393921	Yes	Yes	Yes
SLC5A8	cg10141715	0.794672	0.142895	5.56123	3.10972e-07	2.73544e-05	0.312234	0.628816	0.316581	No	No	No
WT1	cg15446391	1.40263	0.252538	5.55413	3.20347e-07	2.80716e-05	0.340577	0.624627	0.284051	Yes	Yes	Yes
PTPRR	cg23694248	0.787562	0.141837	5.55259	3.22419e-07	2.81458e-05	0.204273	0.5594	0.355127	No	No	No
CCDC13	cg07339138	1.5087	0.271759	5.55162	3.23725e-07	2.81527e-05	0.378573	0.591237	0.212664	No	No	No
DNAI1	cg08578641	0.825885	0.148851	5.5484	3.28118e-07	2.83412e-05	0.249204	0.560468	0.311263	No	No	No
ALS2CR11	cg11052143	0.921677	0.166121	5.54822	3.28362e-07	2.83412e-05	0.202163	0.55389	0.351727	No	No	No
HOXA4	cg04317399	0.725109	0.130722	5.54694	3.30121e-07	2.83863e-05	0.256185	0.573904	0.317719	No	Yes	Yes
CDH24	cg03770548	1.17932	0.213111	5.53384	3.48702e-07	2.98722e-05	0.299543	0.547662	0.248119	No	No	No
ACSL6	cg02257405	1.12453	0.203673	5.52124	3.67549e-07	3.13398e-05	0.211315	0.487408	0.276094	No	No	No
RYR2	cg11657808	0.568381	0.102957	5.52058	3.68563e-07	3.13398e-05	0.134092	0.643293	0.509201	NA	NA	NA
ANKRD25	cg21201109	1.07288	0.194463	5.51715	3.73869e-07	3.1647e-05	0.322909	0.623529	0.300619	No	No	No
ZNF22	cg00899659	1.46176	0.265107	5.51385	3.79052e-07	3.17612e-05	0.171317	0.395742	0.224424	No	No	No
GMEB2	cg24674220	1.14538	0.207762	5.51292	3.80529e-07	3.17689e-05	0.388453	0.65938	0.270927	No	No	No
GRIA4	cg19343464	0.751027	0.136455	5.50385	3.9519e-07	3.27547e-05	0.160107	0.535292	0.375185	NA	NA	NA
ZNF556	cg19636861	0.849152	0.154281	5.50394	3.95054e-07	3.27547e-05	0.340371	0.592912	0.252541	No	No	No
LHX5	cg23182299	0.924843	0.168116	5.50123	3.99543e-07	3.29964e-05	0.0834307	0.334006	0.250575	Yes	Yes	Yes
ID4	cg00468146	2.84332	0.51698	5.49985	4.01838e-07	3.30669e-05	0.0470855	0.117825	0.0707395	No	No	No
FOXL1	cg17095797	1.27613	0.232795	5.48178	4.3324e-07	3.53973e-05	0.223606	0.429599	0.205993	Yes	Yes	Yes
LENEP	cg23154272	1.07197	0.195712	5.4773	4.41393e-07	3.59355e-05	0.373385	0.62552	0.252135	No	No	No
FOXL1	cg06995715	0.601914	0.110039	5.46999	4.55025e-07	3.67844e-05	0.110694	0.626814	0.51612	Yes	Yes	Yes
AGRP	cg06810461	2.74209	0.501683	5.46578	4.63048e-07	3.73017e-05	0.698085	0.827892	0.129807	No	No	No
IL20	cg23282674	1.48898	0.272476	5.46464	4.65259e-07	3.73488e-05	0.359916	0.566071	0.206154	No	No	No
FLT4	cg00489401	0.805922	0.147523	5.46304	4.68358e-07	3.74665e-05	0.300695	0.601254	0.300559	No	No	No
LECT1	cg00708598	1.10917	0.203092	5.46143	4.71512e-07	3.75879e-05	0.145342	0.424251	0.27891	No	No	No
CNNM1	cg01968793	0.834716	0.153082	5.45275	4.88822e-07	3.8833e-05	0.149624	0.478525	0.328901	Yes	Yes	Yes
HSPA2	cg27120999	1.37881	0.253418	5.44085	5.13561e-07	4.05179e-05	0.542169	0.798525	0.256357	No	No	No
KCNV1	cg05860890	0.822236	0.151246	5.43642	5.23084e-07	4.11279e-05	0.0606386	0.459282	0.398644	Yes	Yes	Yes
HTR2C	cg00202711	1.02597	0.189238	5.42157	5.56282e-07	4.32933e-05	0.280229	0.618517	0.338288	Yes	Yes	Yes
ATP10A	cg08828036	2.17	0.400455	5.41884	5.62625e-07	4.3639e-05	0.439662	0.579342	0.139681	No	No	No
KCNA1	cg26590537	0.810389	0.149576	5.41792	5.64769e-07	4.36578e-05	0.0930006	0.436207	0.343206	Yes	Yes	Yes
KCNQ5	cg24687051	0.569426	0.105154	5.41516	5.71264e-07	4.38645e-05	0.106187	0.524592	0.418405	No	Yes	Yes
ENPEP	cg17854440	0.994771	0.184097	5.40351	5.99467e-07	4.58766e-05	0.321027	0.617562	0.296535	No	No	No
CYP26C1	cg20322977	1.57633	0.291977	5.39882	6.11222e-07	4.64664e-05	0.40237	0.620784	0.218413	Yes	Yes	Yes
APOBEC3G	cg04286933	1.34171	0.248965	5.38914	6.36147e-07	4.77964e-05	0.180153	0.4179	0.237747	No	No	No
SLC5A7	cg16232126	0.747332	0.138685	5.3887	6.37329e-07	4.77964e-05	0.157318	0.447446	0.290128	No	No	No
WT1	cg25782229	1.32861	0.246587	5.38801	6.39125e-07	4.77964e-05	0.243434	0.485258	0.241824	Yes	Yes	Yes
SALL3	cg15191648	0.872135	0.162257	5.37504	6.7431e-07	5.02639e-05	0.125639	0.49791	0.372271	NA	NA	NA
ACTN2	cg21376883	0.725789	0.135121	5.37142	6.84459e-07	5.08553e-05	0.159572	0.493009	0.333437	No	No	No
COLEC11	cg26615126	1.75035	0.326031	5.36866	6.92275e-07	5.12701e-05	0.498476	0.690831	0.192355	No	No	No
CNTNAP2	cg16254309	0.813721	0.151757	5.36199	7.11596e-07	5.21959e-05	0.192146	0.581339	0.389193	No	No	No
HAPLN1	cg09893305	1.16844	0.218285	5.35282	7.39012e-07	5.38627e-05	0.325888	0.54163	0.215741	No	No	No
LPA	cg07260592	0.83573	0.156207	5.35016	7.47136e-07	5.42825e-05	0.265551	0.586168	0.320617	No	No	No
MPG	cg16003913	1.5135	0.283307	5.34224	7.71894e-07	5.59044e-05	0.355573	0.582281	0.226708	No	No	No
SLCO1C1	cg18109798	1.38648	0.259769	5.33736	7.87565e-07	5.66818e-05	0.382452	0.59064	0.208188	No	No	No
TRHDE	cg13663218	0.687814	0.129016	5.33123	8.07678e-07	5.79477e-05	0.138034	0.461511	0.323477	Yes	Yes	No
KRTHB3	cg19258973	1.24657	0.234339	5.31951	8.47531e-07	6.04292e-05	0.499589	0.703476	0.203887	No	No	No
ENPEP	cg20773127	1.24114	0.233433	5.3169	8.56661e-07	6.05968e-05	0.2824	0.493981	0.211581	No	No	No
BTG4	cg23211240	0.752397	0.141491	5.31764	8.5407e-07	6.05968e-05	0.13331	0.396452	0.263142	No	Yes	No
POU4F2	cg24199834	0.924574	0.173904	5.31658	8.57799e-07	6.05968e-05	0.256039	0.594483	0.338444	Yes	Yes	Yes
IRX2	cg15433631	1.24843	0.234942	5.31378	8.67708e-07	6.11087e-05	0.348468	0.638942	0.290474	No	No	No
MMP20	cg26757793	1.76602	0.332489	5.3115	8.75897e-07	6.14969e-05	0.307232	0.463584	0.156353	No	No	No
MAGI2	cg05902852	0.608311	0.114673	5.30473	9.00545e-07	6.2843e-05	0.0297669	0.444237	0.41447	No	Yes	No
NDN	cg13828758	1.22327	0.230823	5.2996	9.19716e-07	6.39864e-05	0.558465	0.792573	0.234109	No	No	No
OLFML1	cg06714705	1.10582	0.208859	5.29459	9.38813e-07	6.51176e-05	0.359137	0.622181	0.263044	No	No	No
SLC9A3	cg02748539	0.624965	0.118308	5.28253	9.86355e-07	6.80043e-05	0.101646	0.482561	0.380915	Yes	Yes	Yes
RARRES2	cg17279839	1.0167	0.192444	5.2831	9.84058e-07	6.80043e-05	0.180223	0.448349	0.268126	No	No	Yes
GATA4	cg14900471	0.671663	0.12718	5.28121	9.91735e-07	6.81705e-05	0.0992384	0.516259	0.41702	Yes	Yes	Yes
TP73	cg00565688	0.738713	0.139946	5.27855	1.00257e-06	6.87099e-05	0.10235	0.440184	0.337834	Yes	Yes	Yes
PRX	cg26200585	0.852221	0.16172	5.26973	1.03944e-06	7.10244e-05	0.324616	0.607065	0.28245	No	No	No
IGF2AS	cg13791131	0.882554	0.167729	5.2618	1.07372e-06	7.29329e-05	0.278851	0.567113	0.288262	Yes	Yes	Yes
ADHFE1	cg08090772	0.643708	0.122613	5.24993	1.12709e-06	7.61075e-05	0.069282	0.454935	0.385653	No	No	No
CADPS	cg24505341	1.21905	0.232367	5.24624	1.1442e-06	7.70361e-05	0.296623	0.559263	0.26264	No	No	No
FES	cg24888049	1.15796	0.220813	5.24408	1.1543e-06	7.74889e-05	0.352998	0.619259	0.266261	No	No	No
GNAS	cg24975842	1.17336	0.223911	5.24032	1.17217e-06	7.84591e-05	0.444265	0.674654	0.230389	Yes	No	No
CPXM2	cg03630088	0.7675	0.146577	5.23616	1.19222e-06	7.95045e-05	0.180492	0.505046	0.324554	No	No	No
LOXL3	cg15989091	1.03251	0.197234	5.23494	1.19818e-06	7.95045e-05	0.24654	0.544914	0.298374	No	No	No
SEC31L2	cg20831708	0.603353	0.1155	5.22381	1.25383e-06	8.24821e-05	0.183964	0.468729	0.284765	No	No	No
HOXD10	cg03918304	1.36518	0.261833	5.21393	1.30534e-06	8.51388e-05	0.255305	0.493338	0.238033	NA	NA	NA
ACOX2	cg22012981	0.973476	0.186704	5.21402	1.30486e-06	8.51388e-05	0.498588	0.745644	0.247056	No	No	No
RBM24	cg23207527	1.51903	0.291661	5.2082	1.33613e-06	8.66546e-05	0.275196	0.460272	0.185076	No	Yes	No
OR2L13	cg20507276	0.839098	0.161158	5.20669	1.34434e-06	8.6942e-05	0.287097	0.609884	0.322787	NA	NA	NA
ACTA1	cg13547644	0.612021	0.117755	5.19739	1.39619e-06	8.97891e-05	0.119202	0.495424	0.376222	No	No	No
HTR1B	cg25763788	1.02414	0.197036	5.19772	1.39434e-06	8.97891e-05	0.211544	0.516382	0.304838	No	Yes	No
DNAJB13	cg19692710	1.40901	0.271161	5.19623	1.4028e-06	8.9962e-05	0.279046	0.436545	0.157499	No	No	No
RUNX3	cg03171924	0.794475	0.153013	5.19219	1.42601e-06	9.11962e-05	0.300436	0.628443	0.328007	No	No	No
TBX4	cg18536148	1.26237	0.243217	5.1903	1.437e-06	9.16436e-05	0.482288	0.732271	0.249983	NA	NA	NA
TGIF	cg20322862	1.34902	0.260173	5.18509	1.46778e-06	9.33471e-05	0.541047	0.774416	0.233369	No	No	No
ZIM2	cg02793099	1.31887	0.254563	5.18093	1.49277e-06	9.46743e-05	0.471243	0.667347	0.196104	No	No	No
MEST	cg07427065	1.37328	0.265414	5.17409	1.53484e-06	9.7074e-05	0.570181	0.771084	0.200904	No	No	No
WT1	cg12006284	1.35387	0.261753	5.17232	1.54588e-06	9.73892e-05	0.401176	0.64354	0.242364	Yes	Yes	Yes
KCNC1	cg27409364	1.09589	0.211892	5.17193	1.5483e-06	9.73892e-05	0.431861	0.680225	0.248364	NA	NA	NA
GRIN3A	cg08997253	0.793423	0.153446	5.17071	1.55597e-06	9.76043e-05	0.126326	0.436488	0.310162	Yes	Yes	Yes
PDE4B	cg26963271	0.782406	0.151363	5.16906	1.56643e-06	9.79922e-05	0.0532791	0.320232	0.266953	NA	NA	NA
C1orf114	cg13958426	0.901843	0.174589	5.16551	1.58914e-06	9.91433e-05	0.195258	0.50096	0.305703	No	No	No
SLITRK3	cg14717170	0.813309	0.157483	5.16441	1.59625e-06	9.93165e-05	0.190331	0.554275	0.363944	Yes	Yes	Yes
LEP	cg12782180	1.37401	0.266505	5.15565	1.65398e-06	0.00010263	0.462248	0.704095	0.241847	No	No	No
SALL3	cg08118311	0.752963	0.14618	5.15093	1.68588e-06	0.000104328	0.0798719	0.467742	0.38787	NA	NA	NA
ANKRD25	cg02815516	1.11405	0.216475	5.14632	1.71767e-06	0.000105443	0.300714	0.565292	0.264578	No	No	No
INSR	cg10670077	1.12996	0.219649	5.1444	1.73108e-06	0.000105983	0.329563	0.517161	0.187598	No	No	No
DCC	cg23242898	0.998845	0.194219	5.14287	1.74178e-06	0.000106354	0.245933	0.499551	0.253618	Yes	Yes	Yes
C2orf32	cg07080358	0.591672	0.115177	5.13708	1.78307e-06	0.000108586	0.137542	0.535378	0.397836	Yes	Yes	Yes
PLXNB1	cg12069042	0.865373	0.168515	5.13529	1.79603e-06	0.000108798	0.213337	0.484174	0.270837	No	No	No
KRTAP17-1	cg16242770	1.14843	0.223609	5.13588	1.79178e-06	0.000108798	0.45908	0.674904	0.215824	No	No	No
BCOR	cg03161453	1.61572	0.314909	5.13074	1.82939e-06	0.000109742	0.546781	0.746007	0.199227	No	No	No
EFS	cg17606785	1.0666	0.20785	5.13161	1.82299e-06	0.000109742	0.0866679	0.376208	0.289541	No	No	No
SCN5A	cg19740375	1.04111	0.202905	5.131	1.82745e-06	0.000109742	0.20944	0.403479	0.194039	No	No	No
CDH8	cg27444994	0.864393	0.168479	5.13056	1.83073e-06	0.000109742	0.124987	0.414516	0.289529	NA	NA	NA
KIAA0319L	cg14772955	1.31729	0.257063	5.12438	1.87699e-06	0.000111931	0.355069	0.525189	0.17012	No	No	No
DNAI1	cg23579062	1.12008	0.218574	5.12449	1.87618e-06	0.000111931	0.513538	0.701686	0.188148	No	No	No
RAX	cg19576304	0.882091	0.172242	5.12122	1.90116e-06	0.000113078	0.181085	0.531303	0.350218	Yes	Yes	Yes
HTR1B	cg08614481	0.84545	0.165409	5.11127	1.97904e-06	0.000117406	0.115315	0.410219	0.294905	No	Yes	No
HKR1	cg14166009	0.798822	0.15641	5.10722	2.01164e-06	0.000118727	0.158866	0.461277	0.302411	No	No	No
TCERG1L	cg10175795	0.886245	0.17359	5.10538	2.02663e-06	0.000119305	0.127154	0.426188	0.299034	No	No	No
KCNA5	cg20792062	0.941215	0.184394	5.10436	2.03503e-06	0.000119493	0.311614	0.539833	0.22822	Yes	No	Yes
TSPYL5	cg15747595	1.1695	0.23003	5.08411	2.20801e-06	0.000129319	0.43336	0.662479	0.22912	No	No	No
FBXW10	cg05127924	0.918014	0.180973	5.07266	2.31211e-06	0.000134759	0.280568	0.512146	0.231578	No	No	No
CSMD3	cg06821993	0.789848	0.155708	5.0726	2.31263e-06	0.000134759	0.129078	0.443775	0.314696	Yes	Yes	Yes
PTPRN	cg10140638	0.699282	0.137896	5.07109	2.32673e-06	0.000135237	0.110261	0.471828	0.361567	No	No	No
FLRT1	cg21111471	0.831639	0.164175	5.06557	2.37899e-06	0.000137926	0.204205	0.448444	0.244239	No	No	No
SOX11	cg08432727	0.986036	0.194708	5.06418	2.39231e-06	0.000138349	0.177259	0.450459	0.2732	No	No	No
RARA	cg03085312	1.77826	0.351309	5.0618	2.41527e-06	0.000138976	0.105333	0.182899	0.0775652	No	No	Yes
ST8SIA5	cg19751300	0.81006	0.160117	5.05918	2.44081e-06	0.000140048	0.10488	0.458198	0.353318	No	Yes	Yes
ST8SIA5	cg23129478	0.94526	0.186883	5.05802	2.45219e-06	0.000140048	0.159082	0.453147	0.294065	No	Yes	Yes
PRLHR	cg15748507	0.976751	0.193426	5.04973	2.53522e-06	0.00014443	0.374784	0.660698	0.285914	Yes	Yes	Yes
CHX10	cg11525285	0.802511	0.159026	5.04643	2.56899e-06	0.000145992	0.216567	0.568601	0.352034	Yes	Yes	Yes
PCSK1	cg09786257	1.02839	0.203914	5.04323	2.60219e-06	0.00014715	0.364342	0.587519	0.223176	No	No	No
CDH13	cg08747377	0.93866	0.186255	5.03965	2.6398e-06	0.00014891	0.163794	0.407099	0.243304	Yes	No	No
NDUFS2	cg07354440	1.35033	0.26806	5.0374	2.66371e-06	0.00014989	0.568933	0.763713	0.194779	No	No	No
CDH13	cg13759328	0.831308	0.165054	5.03659	2.67239e-06	0.000150011	0.149244	0.403638	0.254393	Yes	No	No
ITGA8	cg16902509	0.84092	0.167004	5.03533	2.68586e-06	0.0001504	0.248195	0.547241	0.299046	No	No	No
CDH13	cg19369556	0.873399	0.17376	5.02647	2.78296e-06	0.000155458	0.131208	0.38109	0.249882	Yes	No	No
NUPL1	cg08532057	1.1988	0.238656	5.02314	2.82027e-06	0.000157159	0.150068	0.324687	0.174619	No	No	No
NPR2	cg24194775	0.640031	0.127444	5.02207	2.83241e-06	0.000157454	0.217499	0.619683	0.402184	No	No	No
ZIM2	cg17663463	1.51431	0.302335	5.00872	2.98776e-06	0.000165688	0.599248	0.766225	0.166977	No	No	No
GYPC	cg17105014	1.38309	0.276396	5.00403	3.04422e-06	0.000168008	0.202618	0.384206	0.181588	No	No	No
LOXL3	cg23674882	1.40099	0.279942	5.00459	3.03747e-06	0.000168008	0.33519	0.546548	0.211358	No	No	No
PLCD1	cg15120942	1.11202	0.22274	4.99245	3.18835e-06	0.000175541	0.159677	0.343445	0.183768	No	No	No
CENTG2	cg24768561	1.41416	0.283344	4.99099	3.20701e-06	0.000176146	0.479223	0.653438	0.174215	No	No	No
NPY	cg05158615	0.916293	0.183661	4.98905	3.23188e-06	0.000176895	0.189266	0.514229	0.324962	No	No	No
HSPA6	cg13817266	2.40061	0.481207	4.98873	3.23606e-06	0.000176895	0.355163	0.463687	0.108524	Yes	Yes	Yes
PON3	cg24750391	0.995309	0.199917	4.9786	3.36947e-06	0.000182881	0.330298	0.633171	0.302873	No	No	No
LY86	cg02212836	1.06318	0.213611	4.97719	3.38847e-06	0.000183478	0.299572	0.545007	0.245435	No	No	No
HCG9	cg04623837	0.989661	0.198867	4.9765	3.39775e-06	0.000183548	0.236593	0.521674	0.285081	No	Yes	Yes
SLC5A8	cg20740029	0.775503	0.15596	4.97244	3.45316e-06	0.000186104	0.0609025	0.376168	0.315266	No	No	No
PHLDB1	cg06290096	1.31056	0.263819	4.96767	3.51946e-06	0.000189232	0.298541	0.502059	0.203518	Yes	No	Yes
WDR52	cg15044041	1.32348	0.266579	4.96468	3.56152e-06	0.000190601	0.440611	0.668928	0.228317	No	No	No
KALRN	cg12144803	1.22777	0.247377	4.96317	3.583e-06	0.000191305	0.412037	0.625646	0.21361	No	No	No
GABRG2	cg09220361	0.943621	0.190182	4.96166	3.60458e-06	0.000191656	0.206399	0.451529	0.24513	No	No	No
MCHR2	cg20134215	0.851144	0.171548	4.96154	3.60628e-06	0.000191656	0.266345	0.560657	0.294312	No	Yes	No
SLC22A18	cg23698969	2.12536	0.428575	4.95912	3.64118e-06	0.000193064	0.761409	0.876385	0.114976	No	No	No
GRIK3	cg06165395	0.843665	0.170249	4.95548	3.69431e-06	0.000194999	0.143624	0.430276	0.286652	Yes	Yes	Yes
H19	cg11716026	1.67516	0.33861	4.94716	3.8185e-06	0.000200613	0.454848	0.603753	0.148905	NA	NA	NA
PHLDB1	cg11286122	1.64134	0.332093	4.94241	3.89125e-06	0.000203041	0.321723	0.455184	0.133461	Yes	No	Yes
HCG9	cg23244913	0.996926	0.201687	4.94295	3.88301e-06	0.000203041	0.346413	0.636763	0.290351	No	Yes	Yes
ZNF177	cg05250458	1.05133	0.213095	4.93363	4.02934e-06	0.000208823	0.283148	0.568209	0.285062	No	No	No
CDO1	cg07644368	1.07416	0.217872	4.93024	4.08384e-06	0.000211171	0.289984	0.56547	0.275486	No	No	No
FGF10	cg20387341	0.82188	0.166842	4.92609	4.15165e-06	0.000214194	0.106062	0.299186	0.193124	No	Yes	No
GATA4	cg13434842	1.16314	0.236291	4.92249	4.21145e-06	0.000216793	0.388283	0.635141	0.246858	Yes	Yes	Yes
CDKN2A	cg07752420	1.12408	0.228486	4.91967	4.25872e-06	0.000218736	0.251336	0.524221	0.272885	NA	NA	NA
SSTR1	cg27590397	0.74606	0.151699	4.91804	4.28632e-06	0.000219662	0.144848	0.41544	0.270593	Yes	Yes	Yes
TTYH1	cg01661993	0.737865	0.150076	4.91661	4.31059e-06	0.000219924	0.0896771	0.356174	0.266497	Yes	Yes	Yes
SLC12A5	cg22752533	1.19405	0.242845	4.91694	4.30507e-06	0.000219924	0.449784	0.596342	0.146558	Yes	No	No
FLJ20245	cg13085976	1.68313	0.342411	4.91554	4.32906e-06	0.000220376	0.566762	0.703077	0.136315	No	No	No
ACTA2	cg10894512	1.34183	0.273514	4.9059	4.49742e-06	0.00022844	0.394878	0.598978	0.2041	No	No	No
NKX6-2	cg09260089	0.637615	0.129991	4.90507	4.5123e-06	0.00022869	0.085613	0.505624	0.420011	Yes	Yes	Yes
HCA112	cg02244695	0.495733	0.101103	4.90325	4.54489e-06	0.000228826	0.0557407	0.527406	0.471665	No	No	No
PTGDR	cg09516965	0.436221	0.0889593	4.9036	4.53856e-06	0.000228826	0.103834	0.623512	0.519677	Yes	Yes	Yes
CX36	cg21053529	0.744623	0.151854	4.90354	4.53961e-06	0.000228826	0.198293	0.475928	0.277635	Yes	Yes	Yes
UTF1	cg09053680	0.556473	0.113505	4.90263	4.55605e-06	0.000228835	0.122571	0.516717	0.394146	No	No	No
KCNB1	cg24507762	0.827225	0.168749	4.90209	4.56572e-06	0.000228835	0.152984	0.417937	0.264954	No	No	No
C10orf59	cg06812977	0.572361	0.116908	4.89584	4.68007e-06	0.000232463	0.099058	0.424932	0.325874	No	No	No
KCTD8	cg12300353	0.620877	0.12679	4.89691	4.66016e-06	0.000232463	0.0892388	0.519451	0.430212	No	No	No
CYP2W1	cg22025233	1.25493	0.256333	4.89569	4.68281e-06	0.000232463	0.43537	0.625859	0.190489	No	No	No
PRICKLE2	cg22083047	1.79066	0.366084	4.89139	4.76305e-06	0.000235676	0.294763	0.429545	0.134783	No	No	No
LR8	cg08359956	0.87833	0.179743	4.8866	4.85409e-06	0.000239664	0.223372	0.461588	0.238217	No	No	No
BIRC4BP	cg23571857	1.06827	0.218705	4.88451	4.89425e-06	0.000241128	0.329329	0.616254	0.286925	No	No	No
GPHA2	cg20585500	1.116	0.22937	4.86552	5.27506e-06	0.000258779	0.468832	0.67043	0.201598	No	No	No
KAL1	cg13277716	1.43429	0.294927	4.86321	5.32333e-06	0.00026059	0.087151	0.254636	0.167485	Yes	Yes	No
WT1	cg25094569	0.829357	0.170642	4.86021	5.38666e-06	0.000263129	0.266322	0.569435	0.303113	Yes	Yes	Yes
BNC1	cg10398682	0.645689	0.132898	4.85853	5.4224e-06	0.000263954	0.129085	0.488824	0.359738	Yes	Yes	Yes
NKX6-2	cg08441806	1.19515	0.246079	4.85678	5.45989e-06	0.000265015	0.347439	0.534508	0.187069	Yes	Yes	Yes
ZNF659	cg18267381	0.837841	0.172543	4.85583	5.48044e-06	0.000265451	0.241941	0.455778	0.213838	No	No	No
NAP1L3	cg22189618	1.13615	0.23438	4.84748	5.66342e-06	0.000273736	0.0931111	0.267692	0.174581	No	No	No
BHMT	cg10660256	0.983559	0.20302	4.84464	5.72718e-06	0.000275939	0.376518	0.691838	0.31532	Yes	No	No
SLITRK3	cg13619915	0.746925	0.154184	4.84438	5.73304e-06	0.000275939	0.160818	0.51491	0.354091	Yes	Yes	Yes
DNASE1	cg06529761	1.64655	0.340242	4.83935	5.8476e-06	0.000280278	0.670415	0.814915	0.1445	NA	NA	NA
TACR3	cg04263186	0.856684	0.177131	4.83644	5.91484e-06	0.000282208	0.167832	0.449889	0.282057	No	No	No
OPRM1	cg14262937	0.864493	0.178823	4.83436	5.96336e-06	0.000282874	0.113864	0.377458	0.263594	No	No	No
WT1	cg12781568	1.26261	0.261215	4.8336	5.98124e-06	0.000283137	0.281892	0.51075	0.228858	Yes	Yes	Yes
MLL3	cg03634234	1.52531	0.315739	4.83091	6.04462e-06	0.000285321	0.130786	0.288397	0.157611	No	No	No
ADCY4	cg16761581	0.601295	0.124476	4.83059	6.05222e-06	0.000285321	0.185722	0.549394	0.363672	Yes	Yes	Yes
BCL10	cg23665568	1.12278	0.232485	4.82947	6.0789e-06	0.000285991	0.495532	0.709683	0.214151	No	No	No
CYB5R2	cg00859655	2.00765	0.416036	4.82566	6.1706e-06	0.000289712	0.612176	0.758384	0.146208	No	No	No
RTEL1	cg05358404	0.823284	0.170653	4.82431	6.20343e-06	0.000290658	0.297202	0.589451	0.292249	No	No	No
FUT3	cg17471102	1.62772	0.337973	4.81613	6.40572e-06	0.000299526	0.119681	0.204419	0.0847375	No	No	No
WISP3	cg10525372	1.30965	0.27199	4.81506	6.43267e-06	0.000300174	0.388996	0.590585	0.201589	NA	NA	NA
CDH24	cg03156547	0.85259	0.177281	4.80925	6.58085e-06	0.000306466	0.18582	0.456951	0.271131	No	No	No
TNNI3	cg18838701	0.945991	0.197021	4.80148	6.7844e-06	0.000315306	0.161894	0.369091	0.207197	No	No	No
EMD	cg04344997	1.94229	0.405488	4.79	7.09612e-06	0.000329042	0.588927	0.704512	0.115585	No	No	No
RYR2	cg19764418	1.1896	0.248374	4.78955	7.10863e-06	0.000329042	0.529819	0.728025	0.198206	NA	NA	NA
ATP6V0D2	cg01248426	1.32095	0.276279	4.78123	7.34372e-06	0.000338559	0.239131	0.412837	0.173706	No	No	No
TRIM65	cg15238200	1.05296	0.220384	4.77783	7.44168e-06	0.000341703	0.571495	0.790543	0.219048	No	No	No
PXDN	cg14037665	0.607543	0.127186	4.77683	7.47099e-06	0.000342364	0.0972613	0.445203	0.347942	NA	NA	NA
NELL1	cg17371081	0.571745	0.119732	4.77522	7.51812e-06	0.000343838	0.0733349	0.41154	0.338205	Yes	Yes	Yes
MMP27	cg06259570	1.541	0.32297	4.77133	7.63326e-06	0.000348409	0.445549	0.598608	0.153059	No	No	No
FKBP10	cg21416237	1.1478	0.240631	4.76997	7.67374e-06	0.000349562	0.549575	0.738179	0.188605	No	No	No
CMTM2	cg01683883	0.909607	0.190727	4.76915	7.69821e-06	0.000349982	0.438808	0.755719	0.316911	Yes	Yes	Yes
VIPR2	cg18349835	0.521787	0.10952	4.7643	7.84529e-06	0.000355964	0.0632018	0.451575	0.388373	Yes	Yes	No
NTRK3	cg14384532	0.670006	0.140692	4.76221	7.90952e-06	0.00035817	0.17065	0.470643	0.299993	Yes	No	No
NLGN3	cg02345317	1.4678	0.308528	4.75744	8.05814e-06	0.000363635	0.271566	0.413846	0.14228	No	No	No
ZNF606	cg12259537	1.12398	0.236264	4.75732	8.06187e-06	0.000363635	0.174191	0.407192	0.233002	No	No	No
GSH1	cg26609631	0.713534	0.150095	4.75388	8.17083e-06	0.000367827	0.115912	0.352884	0.236972	Yes	Yes	Yes
IRF8	cg06020352	1.2258	0.257889	4.75322	8.19177e-06	0.000368048	0.343048	0.518272	0.175224	No	No	No
ZNF662	cg26523005	1.18128	0.248699	4.74984	8.30016e-06	0.00037219	0.381788	0.596613	0.214825	No	No	No
RUNX3	cg24019564	0.739511	0.155782	4.7471	8.38922e-06	0.00037545	0.123345	0.444079	0.320734	No	No	No
BNC1	cg19988449	0.623847	0.131439	4.74627	8.41641e-06	0.000375934	0.142981	0.48902	0.346039	Yes	Yes	Yes
ZFP42	cg14189571	1.14348	0.241174	4.74131	8.58054e-06	0.000381953	0.293702	0.525578	0.231876	No	No	No
CST11	cg17928268	1.44748	0.305298	4.74119	8.58445e-06	0.000381953	0.259276	0.416168	0.156892	No	No	No
WFIKKN1	cg08858521	1.06524	0.224787	4.73889	8.66193e-06	0.000384655	0.165355	0.397551	0.232196	No	No	No
C10orf30	cg23114594	1.15168	0.243087	4.7377	8.70181e-06	0.00038568	0.459153	0.682762	0.223609	No	No	No
GRIK1	cg09542111	0.835363	0.176381	4.73613	8.75511e-06	0.000387295	0.0846241	0.306651	0.222027	Yes	Yes	Yes
ZNF560	cg05221167	0.8402	0.177429	4.73542	8.77943e-06	0.000387537	0.120462	0.444183	0.323721	No	No	No
CSF1R	cg07260017	1.00496	0.21237	4.73213	8.89252e-06	0.000391112	0.362267	0.601502	0.239234	No	No	No
GRM6	cg15674997	0.877958	0.185732	4.72701	9.07127e-06	0.000396694	0.300255	0.594192	0.293937	No	No	Yes
SRI	cg16639595	1.4002	0.296205	4.72715	9.06645e-06	0.000396694	0.31433	0.473341	0.159012	No	No	No
HOXA9	cg01381846	0.790995	0.167421	4.72459	9.15699e-06	0.000399682	0.304689	0.622608	0.317919	No	Yes	Yes
FBLN1	cg04337944	1.617	0.342479	4.72146	9.26905e-06	0.000403041	0.169505	0.264894	0.0953888	No	No	No
SLC23A1	cg25374813	1.93237	0.410322	4.70939	9.71341e-06	0.000421564	0.105679	0.18488	0.0792007	No	No	No
SCOC	cg04457051	1.32591	0.281828	4.70469	9.89193e-06	0.000428502	0.324124	0.504212	0.180088	No	No	No
SERPINA6	cg10025865	1.27089	0.270466	4.69887	1.01177e-05	0.000436635	0.22299	0.340988	0.117998	No	No	No
HOXA10	cg00518911	1.52546	0.324875	4.69553	1.02494e-05	0.000440661	0.278645	0.428176	0.149531	No	Yes	Yes
ADRA2B	cg21542793	0.997238	0.21246	4.69378	1.03192e-05	0.000442834	0.399657	0.696022	0.296365	No	No	No
RASSF1	cg00777121	0.712276	0.151832	4.69122	1.0422e-05	0.000446409	0.159955	0.487259	0.327304	NA	NA	NA
SSTR5	cg24433189	0.89119	0.190044	4.6894	1.04956e-05	0.000448335	0.128665	0.289131	0.160466	No	No	No
TUBB8	cg01036012	2.2215	0.47385	4.68821	1.0544e-05	0.000448736	0.765749	0.868897	0.103149	NA	NA	NA
TMEFF2	cg06856528	0.688521	0.14687	4.68795	1.05545e-05	0.000448736	0.0704817	0.360492	0.290011	Yes	Yes	Yes
TRPC5	cg22799132	1.06379	0.227334	4.67941	1.09088e-05	0.000462942	0.293189	0.541338	0.248149	Yes	Yes	Yes
PRKAR1B	cg13577076	0.605839	0.129592	4.67497	1.10976e-05	0.000470086	0.231624	0.574471	0.342846	No	No	No
UNQ739	cg04454951	0.958041	0.20538	4.66472	1.15458e-05	0.000486771	0.18744	0.418774	0.231334	NA	NA	NA
HK1	cg06323290	1.41572	0.303822	4.65971	1.17709e-05	0.000493149	0.415821	0.592873	0.177052	No	No	No
NPR2	cg12876594	0.630027	0.135194	4.66017	1.175e-05	0.000493149	0.232374	0.632802	0.400427	No	No	No
HSPB6	cg24673765	1.04577	0.224784	4.65233	1.21107e-05	0.000505671	0.0845598	0.230049	0.145489	No	No	No
FAIM2	cg27188703	0.79918	0.171783	4.65226	1.21139e-05	0.000505671	0.389944	0.727847	0.337903	No	No	No
DLK1	cg17412258	0.913255	0.196486	4.64795	1.2317e-05	0.000513219	0.14407	0.441375	0.297306	No	Yes	Yes
C21orf124	cg21755709	1.17368	0.252569	4.64698	1.23632e-05	0.00051421	0.361799	0.599268	0.237468	NA	NA	NA
HSPB2	cg13210534	1.29207	0.278166	4.64495	1.246e-05	0.000517298	0.178377	0.35317	0.174793	No	No	No
FRMPD4	cg17398312	0.670659	0.144486	4.64168	1.26182e-05	0.000521347	0.271723	0.608949	0.337226	Yes	Yes	Yes
ACVRL1	cg23640701	0.921459	0.198525	4.64152	1.26257e-05	0.000521347	0.552178	0.763136	0.210958	No	No	No
BCAN	cg21475402	0.636396	0.137152	4.64009	1.26954e-05	0.000523287	0.143784	0.467436	0.323652	No	No	Yes
HTR1E	cg11990309	1.06697	0.229996	4.63909	1.27444e-05	0.000524366	0.118021	0.209272	0.091251	No	Yes	No
RASSF1	cg21554552	0.806662	0.174001	4.63597	1.28985e-05	0.000529756	0.136262	0.388562	0.2523	NA	NA	NA
ISLR	cg02077702	1.23521	0.266494	4.63503	1.29452e-05	0.000530583	0.359159	0.577991	0.218832	No	No	No
APOC3	cg04048249	1.77404	0.382908	4.63306	1.30436e-05	0.000530583	0.484081	0.629436	0.145356	No	No	No
SLC6A2	cg04490714	0.685983	0.14807	4.63285	1.30542e-05	0.000530583	0.0415088	0.239697	0.198189	Yes	No	Yes
GDF10	cg07773116	0.65687	0.141787	4.63278	1.30573e-05	0.000530583	0.122171	0.481147	0.358977	No	No	No
NR0B1	cg09562455	1.08558	0.234316	4.63298	1.30473e-05	0.000530583	0.302957	0.482197	0.17924	Yes	No	No
IGSF21	cg17945001	0.909489	0.196256	4.63421	1.29861e-05	0.000530583	0.0704106	0.276037	0.205626	Yes	Yes	Yes
SLC6A7	cg19435264	0.822333	0.17758	4.63078	1.31586e-05	0.000533753	0.075764	0.286034	0.21027	No	No	No
RUFY3	cg06059810	1.46972	0.317445	4.62984	1.32061e-05	0.000534337	0.41373	0.587137	0.173408	No	No	No
ADCY4	cg12265829	0.659429	0.142445	4.62937	1.32297e-05	0.000534337	0.185994	0.506774	0.32078	Yes	Yes	Yes
NEFH	cg02994956	1.14493	0.24757	4.62469	1.34699e-05	0.000540958	0.43457	0.599319	0.164749	Yes	No	Yes
PTGDS	cg11546621	1.14928	0.248468	4.62545	1.34305e-05	0.000540958	0.412627	0.598712	0.186086	No	No	No
WT1	cg13641903	1.33139	0.287898	4.62454	1.34776e-05	0.000540958	0.538106	0.719895	0.181788	Yes	Yes	Yes
-99	cg12537796	1.19233	0.258117	4.61935	1.3749e-05	0.000549929	0.388611	0.627999	0.239388	NA	NA	NA
PDLIM4	cg01305625	0.934668	0.202377	4.61844	1.37969e-05	0.000550887	0.207431	0.457188	0.249756	No	No	No
KCNB2	cg20890210	0.727236	0.157757	4.60986	1.4259e-05	0.000567365	0.133138	0.44347	0.310332	NA	NA	NA
PTPRT	cg04541293	1.19952	0.260256	4.60901	1.43058e-05	0.00056824	0.11963	0.298093	0.178463	Yes	Yes	Yes
GRM7	cg02332525	1.08139	0.234905	4.60351	1.46106e-05	0.000578347	0.342802	0.571711	0.228909	Yes	Yes	Yes
PITX2	cg14056644	0.718181	0.156118	4.60025	1.47943e-05	0.000584609	0.279383	0.609269	0.329886	Yes	Yes	Yes
GJA12	cg22844623	1.51821	0.330185	4.59806	1.49188e-05	0.000588518	0.612376	0.773959	0.161583	No	No	No
DCC	cg18841634	1.18249	0.257246	4.59672	1.49955e-05	0.000589808	0.0852062	0.267979	0.182773	Yes	Yes	Yes
OTP	cg15852891	0.92534	0.201386	4.59485	1.51034e-05	0.000592744	0.102759	0.368651	0.265891	Yes	Yes	Yes
BNC1	cg18952647	0.634353	0.138088	4.59385	1.51615e-05	0.000594007	0.112941	0.478913	0.365972	Yes	Yes	Yes
SNRPN	cg22678136	1.35154	0.294317	4.59213	1.52616e-05	0.000596912	0.581157	0.777561	0.196405	No	No	No
ACP5	cg21207418	1.35567	0.295756	4.58375	1.57587e-05	0.000614216	0.406163	0.606072	0.19991	No	No	No
DDR2	cg17496788	1.49837	0.327151	4.58006	1.59829e-05	0.000620891	0.317662	0.443499	0.125836	No	No	No
TRPM3	cg16832407	0.891698	0.194776	4.57807	1.61049e-05	0.000624572	0.197052	0.386366	0.189315	No	No	No
PDGFRB	cg11042320	1.42156	0.310577	4.57717	1.61599e-05	0.000624597	0.156495	0.298086	0.141591	No	No	No
RHO	cg13180098	1.49336	0.326261	4.5772	1.61584e-05	0.000624597	0.357123	0.523197	0.166074	No	No	No
CACNA1G	cg05942574	1.17356	0.256505	4.57518	1.62832e-05	0.000628305	0.138298	0.289291	0.150993	Yes	Yes	Yes
EMILIN1	cg20516209	1.10754	0.242178	4.57324	1.64046e-05	0.000631926	0.535073	0.740313	0.20524	No	No	No
GFRA1	cg12087643	0.839582	0.183775	4.56852	1.67029e-05	0.000642339	0.0695275	0.306103	0.236575	Yes	Yes	No
NR6A1	cg08758850	1.48918	0.326035	4.56754	1.67655e-05	0.00064367	0.102894	0.247696	0.144802	No	No	No
GPR133	cg06550629	0.841396	0.184246	4.56671	1.68189e-05	0.00064464	0.291303	0.54091	0.249607	No	No	No
DIO3	cg04623955	0.835428	0.183039	4.56421	1.69803e-05	0.000649641	0.172284	0.461754	0.28947	Yes	Yes	Yes
GSDML	cg10057218	1.79283	0.392837	4.56381	1.70059e-05	0.000649641	0.639136	0.799363	0.160227	No	No	No
ZNF96	cg07660236	1.06567	0.23364	4.56115	1.71797e-05	0.000654102	0.195804	0.442934	0.24713	No	No	No
MVP	cg22784047	2.11145	0.463494	4.5555	1.75534e-05	0.00066612	0.576136	0.687868	0.111732	No	No	No
FLJ39501	cg14851685	0.788317	0.173163	4.55247	1.77577e-05	0.000671653	0.26887	0.456636	0.187767	NA	NA	NA
APOBEC3G	cg26022401	0.91586	0.201304	4.54964	1.79502e-05	0.00067449	0.0657193	0.291266	0.225547	No	No	No
SLC22A18	cg04726200	1.58986	0.349529	4.54858	1.80225e-05	0.000674999	0.586566	0.738553	0.151987	No	No	No
PDLIM4	cg20512303	1.06258	0.233588	4.54895	1.79975e-05	0.000674999	0.386979	0.619648	0.23267	No	No	No
MASK	cg22016571	1.27482	0.280383	4.54672	1.81509e-05	0.000678699	0.352664	0.51116	0.158495	No	No	No
ADRA1D	cg11934695	0.763849	0.168209	4.54106	1.8546e-05	0.00069122	0.132323	0.340329	0.208006	No	No	No
CBLN4	cg02501779	1.10807	0.244119	4.53906	1.8688e-05	0.000695384	0.097912	0.273645	0.175733	Yes	Yes	Yes
SEC31L2	cg26705561	0.842555	0.186183	4.52541	1.96828e-05	0.000728856	0.282337	0.466251	0.183914	No	No	No
GALC	cg24058132	1.06776	0.23619	4.52075	2.00345e-05	0.000739494	0.225095	0.346931	0.121836	No	No	No
MSC	cg23710218	0.78877	0.174742	4.51392	2.05606e-05	0.000756483	0.306239	0.573541	0.267302	Yes	Yes	Yes
CYGB	cg17040807	1.15335	0.255535	4.51347	2.05959e-05	0.000756567	0.249009	0.420682	0.171673	No	No	No
SNRPN	cg25657700	1.14572	0.253876	4.51291	2.06396e-05	0.000756962	0.617707	0.8155	0.197793	No	No	No
BNC1	cg17051321	0.801612	0.177644	4.51247	2.06738e-05	0.000757008	0.127163	0.37973	0.252567	Yes	Yes	Yes
RPS13	cg05592434	3.27941	0.727141	4.51	2.08687e-05	0.000762927	0.0448664	0.0984857	0.0536192	No	No	No
TGIF	cg13224710	1.98406	0.440019	4.50903	2.09458e-05	0.000764528	0.687264	0.776488	0.089224	No	No	No
JOSD2	cg13521229	0.997452	0.221475	4.50367	2.13752e-05	0.0007765	0.464183	0.671947	0.207765	No	No	No
HBG1	cg01598642	1.26899	0.281824	4.50277	2.14481e-05	0.000777847	0.409021	0.547099	0.138078	No	No	No
FBXW10	cg10762615	0.847624	0.188261	4.50238	2.14801e-05	0.000777847	0.251083	0.429509	0.178426	No	No	No
C3orf24	cg13560548	1.98096	0.440559	4.49647	2.19659e-05	0.000792937	0.78082	0.866665	0.0858451	No	No	No
SGCG	cg07126559	1.06215	0.236335	4.49427	2.21502e-05	0.000798335	0.37981	0.609105	0.229294	No	No	No
RUNX1T1	cg19007731	1.05705	0.235454	4.4894	2.25616e-05	0.000810617	0.296762	0.523208	0.226446	No	No	No
MLNR	cg02620013	0.792007	0.176566	4.48563	2.28861e-05	0.000819713	0.169918	0.43344	0.263521	Yes	Yes	No
GATA4	cg19172575	1.07458	0.239555	4.48575	2.28757e-05	0.000819713	0.394531	0.608352	0.213821	Yes	Yes	Yes
LECT1	cg22398616	0.926332	0.20668	4.48197	2.3205e-05	0.000829838	0.294992	0.538936	0.243945	No	No	No
HAAO	cg20289949	0.543781	0.121447	4.4775	2.35998e-05	0.000841337	0.140365	0.608995	0.46863	No	No	No
AMT	cg25021247	1.44904	0.323724	4.47615	2.37207e-05	0.000844337	0.28548	0.448263	0.162783	No	No	No
WT1	cg22511262	0.979602	0.218881	4.4755	2.37789e-05	0.000845096	0.111266	0.380559	0.269293	Yes	Yes	Yes
PCDHB15	cg11368643	0.903921	0.202138	4.47181	2.41125e-05	0.000854307	0.348023	0.626874	0.278851	No	No	No
COLEC11	cg18105675	1.01756	0.227531	4.47217	2.40799e-05	0.000854307	0.444181	0.721917	0.277736	No	No	No
TGM1	cg14587868	1.43434	0.320976	4.46869	2.4398e-05	0.000861765	0.538292	0.695127	0.156835	No	No	No
SPARCL1	cg19466563	1.02404	0.229198	4.46792	2.44686e-05	0.000862929	0.261319	0.457993	0.196674	No	No	No
EPHA10	cg12128017	0.716717	0.160482	4.46603	2.46441e-05	0.000867787	0.103753	0.404776	0.301023	Yes	No	Yes
MEGF11	cg26416466	0.671629	0.150475	4.46339	2.48909e-05	0.000875134	0.0806324	0.43466	0.354028	Yes	Yes	No
C4orf8	cg22980079	1.0284	0.23068	4.45813	2.53893e-05	0.000889933	0.423887	0.649891	0.226004	NA	NA	NA
NPTX2	cg12799895	0.705687	0.158586	4.44987	2.61913e-05	0.00091247	0.095405	0.412847	0.317442	No	Yes	No
HTRA4	cg12535715	1.13865	0.255949	4.44873	2.63045e-05	0.000915025	0.456587	0.679971	0.223384	Yes	No	No
EFS	cg07197059	0.821344	0.184887	4.4424	2.69381e-05	0.000931423	0.316859	0.585352	0.268493	No	No	No
HIST1H3C	cg25438963	0.567571	0.127762	4.44242	2.69359e-05	0.000931423	0.16669	0.521761	0.35507	No	Yes	No
MICAL1	cg05949660	0.83845	0.188881	4.43904	2.7281e-05	0.000940446	0.297624	0.516037	0.218413	No	No	No
AOC3	cg21602160	1.14603	0.258488	4.43358	2.78463e-05	0.000957268	0.302492	0.453416	0.150924	NA	NA	NA
CDH5	cg22319147	0.723431	0.163173	4.43352	2.78524e-05	0.000957268	0.14673	0.348349	0.201619	No	No	No
SAMD4A	cg24256211	3.65771	0.825852	4.42901	2.83279e-05	0.000972156	0.0689972	0.10675	0.0377529	No	No	No
MEGF10	cg26465611	0.940844	0.212493	4.42766	2.84727e-05	0.000974293	0.338722	0.559054	0.220332	No	No	No
RASSF1	cg08047457	0.577346	0.130516	4.42357	2.89125e-05	0.000985094	0.166924	0.530752	0.363828	NA	NA	NA
GATA4	cg01546563	0.787432	0.178104	4.4212	2.91716e-05	0.00098782	0.165772	0.457362	0.291591	Yes	Yes	Yes
NCAM2	cg13297960	0.831952	0.188147	4.42183	2.91026e-05	0.00098782	0.203942	0.435104	0.231163	No	No	No
T	cg17188046	0.646762	0.146281	4.42136	2.91539e-05	0.00098782	0.0789799	0.307263	0.228283	No	Yes	Yes
HTR2C	cg05772663	0.979579	0.221679	4.41891	2.94233e-05	0.000994875	0.213385	0.484481	0.271095	Yes	Yes	Yes
FUT5	cg21570818	1.20655	0.273097	4.41805	2.95184e-05	0.000996624	0.325872	0.469813	0.14394	NA	NA	NA
LIMS2	cg16944093	1.53479	0.347686	4.4143	2.99353e-05	0.00100774	0.129111	0.221728	0.0926171	NA	NA	NA
BTBD5	cg21096966	0.869189	0.197191	4.40786	3.06673e-05	0.00102636	0.252895	0.488643	0.235748	No	No	No
TMEM119	cg16708012	1.0683	0.242891	4.39826	3.1789e-05	0.00105773	0.341708	0.567316	0.225608	No	No	No
MGC11271	cg21517055	0.913391	0.207748	4.39664	3.19825e-05	0.00106263	0.205151	0.38479	0.179639	No	No	No
ALDH3B1	cg07730301	1.2822	0.291872	4.39302	3.24176e-05	0.00107296	0.143183	0.242463	0.0992801	No	No	No
ZNF677	cg18335068	0.574101	0.130689	4.39289	3.24338e-05	0.00107296	0.0907592	0.374342	0.283583	No	No	No
P8	cg15149645	0.843678	0.192235	4.38878	3.29355e-05	0.00108643	0.199371	0.39191	0.192539	No	No	No
PEG3	cg19098268	2.04223	0.46529	4.38914	3.28914e-05	0.00108643	0.759598	0.872631	0.113033	No	No	No
GPNMB	cg17274742	1.36137	0.310824	4.37988	3.40497e-05	0.00112128	0.234434	0.359167	0.124733	No	No	No
TRIM54	cg25218351	0.987374	0.22545	4.37956	3.40896e-05	0.00112128	0.386893	0.634317	0.247425	No	No	No
GAPDHS	cg01443452	1.17123	0.267521	4.37807	3.42795e-05	0.00112591	0.594901	0.765636	0.170735	No	No	No
SLITL2	cg09276451	1.15275	0.263451	4.37558	3.45997e-05	0.0011348	0.259047	0.398528	0.139481	No	No	No
COL15A1	cg20503329	1.28233	0.293212	4.37339	3.48834e-05	0.00114248	0.409095	0.602994	0.1939	NA	NA	NA
PCDHGB7	cg23563234	0.874636	0.200033	4.37245	3.5006e-05	0.00114486	0.227128	0.529611	0.302483	No	No	No
DSC3	cg15439862	0.802919	0.18372	4.37035	3.52812e-05	0.00115222	0.0688863	0.293417	0.224531	Yes	Yes	Yes
SERPINB2	cg24691255	0.840594	0.192395	4.36911	3.54446e-05	0.00115591	0.461525	0.66125	0.199725	No	No	No
LOC654342	cg27011193	1.59648	0.36549	4.36804	3.5586e-05	0.00115888	0.28293	0.404816	0.121886	NA	NA	NA
HIST1H4F	cg08260959	0.93713	0.214632	4.36622	3.58281e-05	0.00116346	0.212351	0.490343	0.277992	No	Yes	No
PTPRN	cg06971096	0.865097	0.198181	4.3652	3.59657e-05	0.00116628	0.250038	0.47147	0.221433	No	No	No
SLC22A3	cg07237939	0.674363	0.154671	4.35998	3.66706e-05	0.00118579	0.0553706	0.28659	0.231219	No	Yes	Yes
UCN	cg20028470	1.18558	0.272159	4.35623	3.71871e-05	0.00120025	0.328634	0.464854	0.13622	Yes	Yes	Yes
SLC6A3	cg13202751	1.03788	0.238355	4.35435	3.74471e-05	0.0012058	0.229161	0.474381	0.24522	Yes	Yes	Yes
CPNE9	cg16191009	1.22917	0.282599	4.34953	3.81247e-05	0.0012259	0.466162	0.655226	0.189064	No	No	No
KRTHB5	cg06132342	1.18302	0.272367	4.34347	3.89942e-05	0.00125211	0.381446	0.590126	0.20868	No	No	No
C20orf141	cg01265637	2.07566	0.47805	4.34193	3.92178e-05	0.00125753	0.728087	0.814377	0.0862901	No	No	No
CCDC60	cg02498063	1.52033	0.350239	4.34085	3.93745e-05	0.00126079	0.35719	0.511104	0.153914	No	No	No
LDB2	cg03368758	1.34178	0.309184	4.33974	3.95378e-05	0.00126426	0.33799	0.499921	0.161931	No	No	No
HIST1H2AK	cg02367951	0.932235	0.215128	4.33339	4.04807e-05	0.00128902	0.235912	0.451997	0.216085	No	Yes	No
AD031	cg06378107	1.32144	0.304925	4.33364	4.04425e-05	0.00128902	0.308328	0.460971	0.152643	No	No	No
FLJ34503	cg20945531	1.06787	0.246719	4.32827	4.12562e-05	0.0013119	0.315783	0.49107	0.175287	No	No	No
SORCS3	cg09551147	0.526872	0.12187	4.32322	4.20358e-05	0.001333	0.14321	0.517402	0.374192	Yes	Yes	Yes
HOXD12	cg23130254	1.11519	0.257936	4.3235	4.19922e-05	0.001333	0.406355	0.622842	0.216487	Yes	Yes	Yes
PGLYRP1	cg02806777	1.0053	0.232774	4.31877	4.27348e-05	0.00135329	0.393843	0.64024	0.246397	No	No	No
PCDHGB4	cg00911351	0.940502	0.21779	4.3184	4.27942e-05	0.0013533	0.229584	0.463283	0.233699	NA	NA	NA
DNAJC15	cg11679069	1.67881	0.389109	4.31449	4.34185e-05	0.00137116	0.288145	0.416307	0.128162	No	No	No
AKNA	cg19556572	1.73002	0.401216	4.31193	4.3831e-05	0.00138208	0.424923	0.551557	0.126634	No	No	No
HIST1H2BI	cg27059238	1.13079	0.26234	4.31038	4.40838e-05	0.00138266	0.196712	0.387964	0.191252	No	No	No
NR1I3	cg06277277	1.03155	0.239516	4.3068	4.46703e-05	0.00139914	0.388679	0.613898	0.225218	No	No	No
PCDH11X	cg07474356	1.36213	0.316542	4.30317	4.52747e-05	0.00141614	0.0908874	0.22546	0.134573	Yes	No	No
THEM5	cg18081104	1.54068	0.358162	4.30163	4.55333e-05	0.00142229	0.401966	0.541139	0.139172	No	No	No
DLK1	cg09873258	1.17218	0.272525	4.3012	4.56053e-05	0.00142261	0.376503	0.543819	0.167316	No	Yes	Yes
HOXD12	cg03874199	0.744337	0.173115	4.29967	4.58641e-05	0.00142874	0.215065	0.497072	0.282008	Yes	Yes	Yes
DPEP3	cg21695020	2.21877	0.51639	4.2967	4.63703e-05	0.00144255	0.679266	0.782022	0.102756	No	No	No
SNTG1	cg08896053	0.722587	0.168492	4.28856	4.77853e-05	0.00148255	0.153707	0.380957	0.22725	No	No	No
VGLL2	cg11191210	0.664313	0.154931	4.28779	4.79211e-05	0.00148476	0.103307	0.370201	0.266894	No	Yes	Yes
TIMP3	cg22578204	0.569577	0.132859	4.28706	4.80493e-05	0.00148672	0.05725	0.315744	0.258494	No	No	No
POU3F4	cg23921534	1.70653	0.398257	4.28499	4.84183e-05	0.00149613	0.326072	0.452502	0.12643	Yes	Yes	Yes
DCC	cg25602457	1.00696	0.235028	4.28443	4.85186e-05	0.00149721	0.0651891	0.26904	0.20385	Yes	Yes	Yes
UTF1	cg03755123	0.806716	0.188353	4.283	4.87744e-05	0.00149906	0.30787	0.55713	0.24926	No	No	No
PDE4A	cg08859675	1.00153	0.233828	4.28318	4.87419e-05	0.00149906	0.521348	0.685224	0.163876	No	No	No
OTOP1	cg14882700	0.748162	0.174656	4.28364	4.86599e-05	0.00149906	0.316233	0.595544	0.279311	Yes	Yes	Yes
MEST	cg18183281	1.8314	0.427747	4.2815	4.90442e-05	0.00150497	0.666428	0.775245	0.108817	No	No	No
F2RL3	cg19006008	0.803888	0.187771	4.28121	4.90979e-05	0.00150497	0.115855	0.443929	0.328074	No	No	No
TBX20	cg13870866	0.703181	0.164303	4.27979	4.93559e-05	0.00150885	0.201957	0.438798	0.236842	No	Yes	Yes
AK1	cg11714502	1.32973	0.311106	4.2742	5.03811e-05	0.0015361	0.107624	0.221417	0.113793	No	No	No
TRPM1	cg18085517	0.842152	0.19715	4.27163	5.08608e-05	0.00154662	0.225713	0.50899	0.283277	No	No	No
FLJ20160	cg15998761	1.38736	0.325054	4.26811	5.15243e-05	0.0015632	0.374098	0.522847	0.148748	No	No	No
ZNF593	cg11418559	1.13046	0.265279	4.26141	5.28097e-05	0.00159532	0.170434	0.316829	0.146394	No	No	No
ELA2A	cg15952725	1.82941	0.42949	4.25949	5.31831e-05	0.00160449	0.571545	0.691668	0.120123	No	No	No
IGFALS	cg01747665	1.56066	0.366618	4.25692	5.36888e-05	0.0016155	0.670291	0.789126	0.118835	NA	NA	NA
KCNH8	cg07657236	0.709008	0.166543	4.2572	5.36341e-05	0.0016155	0.081078	0.369369	0.288291	No	No	No
GALR1	cg10486998	0.620787	0.145938	4.25379	5.43103e-05	0.00163206	0.101672	0.402998	0.301326	NA	NA	NA
GABRA4	cg16358826	0.989122	0.232649	4.25156	5.47552e-05	0.001639	0.206095	0.441371	0.235276	Yes	Yes	Yes
PRKCDBP	cg18959478	0.660504	0.155615	4.24449	5.6196e-05	0.00167339	0.0546267	0.325514	0.270888	No	No	No
WBSCR17	cg01366419	0.727838	0.171522	4.24342	5.6417e-05	0.00167668	0.144636	0.418369	0.273732	No	No	No
FOXD4L1	cg16708281	0.968401	0.228276	4.24224	5.66605e-05	0.00168069	0.26648	0.54097	0.27449	Yes	Yes	Yes
MORF4L2	cg26309951	1.40412	0.331511	4.23551	5.8077e-05	0.00171826	0.170762	0.2672	0.0964374	No	Yes	No
DIO2	cg00217795	0.844018	0.1993	4.2349	5.82052e-05	0.00171984	0.18221	0.337048	0.154838	No	No	No
PPFIA2	cg24719984	0.764144	0.180476	4.23404	5.83899e-05	0.00172087	0.100967	0.298207	0.197241	NA	NA	NA
PILRA	cg06762858	2.93271	0.693024	4.23176	5.88788e-05	0.00173305	0.807375	0.869305	0.0619308	No	No	No
IL11RA	cg21504624	0.857855	0.202804	4.22996	5.92685e-05	0.00174229	0.115738	0.329138	0.213399	No	No	No
LIPE	cg14679230	1.29347	0.306216	4.22403	6.05691e-05	0.00177597	0.323607	0.447647	0.12404	No	No	No
FLJ36070	cg27256309	1.08256	0.256755	4.21633	6.22992e-05	0.00182438	0.271744	0.427416	0.155672	NA	NA	NA
KCNS2	cg05373457	0.979007	0.23227	4.21495	6.26147e-05	0.00182895	0.229044	0.490399	0.261354	No	No	Yes
FBXO39	cg02613386	0.576209	0.136857	4.2103	6.36858e-05	0.00185082	0.101002	0.372836	0.271835	Yes	Yes	No
BOK	cg00603172	0.985458	0.234112	4.20934	6.39095e-05	0.00185497	0.426102	0.585185	0.159082	No	No	No
SPDY1	cg06816106	0.605644	0.143975	4.2066	6.45534e-05	0.00186658	0.0814003	0.419283	0.337883	No	No	No
PKP3	cg00935364	1.12359	0.26714	4.20599	6.46957e-05	0.00186834	0.45051	0.568385	0.117875	No	No	No
KCNE3	cg02595219	0.623574	0.148336	4.20378	6.52199e-05	0.00188111	0.131027	0.360639	0.229612	No	No	No
GPRASP2	cg00862041	1.32896	0.316309	4.20146	6.57735e-05	0.00189109	0.417546	0.563777	0.146231	No	No	No
GRIN2A	cg25047001	0.787652	0.187461	4.20168	6.57218e-05	0.00189109	0.0786945	0.284457	0.205763	NA	NA	NA
NAALAD2	cg05500015	0.72745	0.173211	4.19978	6.61782e-05	0.00189921	0.116658	0.31225	0.195592	No	No	No
NAT8	cg09172980	1.2236	0.291414	4.19885	6.64041e-05	0.00190331	0.19462	0.326069	0.131449	No	No	No
MEG3	cg04291079	1.43576	0.342757	4.18885	6.88675e-05	0.00197146	0.69343	0.824796	0.131366	NA	NA	NA
ELA3B	cg27069753	1.19474	0.285404	4.18614	6.95516e-05	0.00198856	0.505234	0.668854	0.16362	No	No	No
PEG3	cg19335327	1.33953	0.320041	4.18548	6.97183e-05	0.00199085	0.470955	0.624889	0.153934	No	No	No
ELA2B	cg24030609	1.56783	0.374663	4.18464	6.99307e-05	0.00199443	0.346306	0.479228	0.132922	No	No	No
FBXL22	cg01767116	0.816069	0.195215	4.18035	7.10308e-05	0.00201579	0.161173	0.348272	0.187099	No	No	No
MBD3	cg03569412	0.781105	0.186955	4.17803	7.16332e-05	0.00202456	0.358234	0.598009	0.239775	No	No	No
FLJ10916	cg07952391	0.562071	0.134519	4.17839	7.15388e-05	0.00202456	0.114022	0.357582	0.243561	No	No	No
GPRASP2	cg23066860	1.51939	0.363716	4.17743	7.17908e-05	0.00202485	0.33807	0.432076	0.0940062	No	No	No
CFI	cg12243271	1.8643	0.446432	4.17599	7.21659e-05	0.00203293	0.372783	0.44686	0.0740769	No	No	No
PDE1C	cg22131691	0.570432	0.136612	4.17555	7.22808e-05	0.00203367	0.115747	0.436575	0.320828	No	No	No
CLEC11A	cg20308817	1.45085	0.347721	4.17245	7.31005e-05	0.00205219	0.630907	0.780881	0.149974	No	No	No
RAB42	cg02525756	1.34006	0.321315	4.17055	7.36057e-05	0.00206336	0.144054	0.233489	0.0894345	No	No	No
RLN3R1	cg03909500	0.885905	0.212652	4.16599	7.48369e-05	0.00207711	0.059355	0.20233	0.142975	No	No	No
ADRA2C	cg04325632	2.04906	0.491893	4.16566	7.49254e-05	0.00207711	0.0978857	0.159916	0.0620301	NA	NA	NA
CIDEC	cg05684195	1.54496	0.370759	4.16703	7.45552e-05	0.00207711	0.686512	0.780096	0.0935842	No	No	No
CHRDL1	cg12485020	1.08908	0.26148	4.16505	7.50912e-05	0.00207711	0.208495	0.395544	0.187049	No	No	Yes
ZNF300	cg19014419	0.752621	0.180637	4.16649	7.46999e-05	0.00207711	0.087937	0.373217	0.28528	No	No	No
C20orf165	cg21023770	1.334	0.32028	4.16511	7.50765e-05	0.00207711	0.368519	0.538572	0.170053	No	No	No
COX7A1	cg24335895	1.1982	0.28752	4.16736	7.44645e-05	0.00207711	0.293638	0.486423	0.192785	No	No	No
ATP2A1	cg11094938	1.672	0.402023	4.15896	7.677e-05	0.00211336	0.709352	0.816017	0.106665	No	No	No
AKAP10	cg11630242	0.677481	0.162914	4.15851	7.68951e-05	0.00211427	0.23128	0.498391	0.267111	No	No	No
RAFTLIN	cg07200280	0.953768	0.229454	4.15668	7.74076e-05	0.00212329	0.148835	0.312587	0.163752	Yes	No	No
NGB	cg15501381	1.02967	0.247715	4.15667	7.74084e-05	0.00212329	0.497085	0.720508	0.223424	Yes	Yes	No
COL11A1	cg12884406	0.692274	0.166821	4.1498	7.9361e-05	0.0021665	0.138441	0.403414	0.264973	No	No	No
WBSCR27	cg02237119	1.29535	0.312197	4.14916	7.95461e-05	0.00216897	0.21221	0.297822	0.0856126	No	No	No
NETO1	cg21922574	0.865833	0.20872	4.1483	7.97928e-05	0.00217312	0.0524993	0.297233	0.244733	No	No	No
KRTHA4	cg06074920	1.13311	0.273421	4.1442	8.09867e-05	0.00220302	0.399268	0.520811	0.121542	NA	NA	NA
GALR1	cg15343119	0.585431	0.141324	4.14247	8.1495e-05	0.00221422	0.0883773	0.402764	0.314387	NA	NA	NA
GABRA2	cg21820677	0.830461	0.200527	4.14139	8.18127e-05	0.00221997	0.0942792	0.328465	0.234186	Yes	Yes	Yes
IRF8	cg24826867	0.552128	0.133329	4.1411	8.18999e-05	0.00221997	0.0867312	0.395597	0.308866	No	No	No
BTG4	cg22879515	0.447661	0.108198	4.13744	8.29894e-05	0.00224273	0.0899945	0.400532	0.310538	No	Yes	No
MGC52057	cg09500672	3.9991	0.967792	4.13219	8.45809e-05	0.00227919	0.0430027	0.0829598	0.0399571	NA	NA	NA
TMEM61	cg02008416	1.2798	0.309781	4.13131	8.48497e-05	0.00228375	0.378116	0.561566	0.18345	No	No	No
KIF5A	cg04270799	0.719993	0.174518	4.12561	8.66146e-05	0.00232222	0.129845	0.315584	0.185739	No	No	No
HSPB6	cg15125472	1.24623	0.302088	4.12539	8.66836e-05	0.00232222	0.0875809	0.17853	0.0909494	No	No	No
TRPC3	cg18474934	1.78267	0.432065	4.12593	8.65149e-05	0.00232222	0.676504	0.798645	0.122141	No	No	No
TNFRSF1B	cg26189983	0.647386	0.156926	4.12542	8.66742e-05	0.00232222	0.053484	0.385143	0.331659	Yes	No	Yes
HTR5A	cg25780543	0.702837	0.170409	4.1244	8.69925e-05	0.00232778	0.347071	0.581504	0.234433	NA	NA	NA
C6orf206	cg04600618	0.699608	0.169701	4.12259	8.75641e-05	0.00233763	0.233295	0.536129	0.302834	No	No	No
PHYHD1	cg12754854	1.57558	0.382266	4.12169	8.78495e-05	0.00234252	0.378377	0.507869	0.129491	No	No	No
PDE1C	cg00546491	1.05391	0.255781	4.12036	8.82702e-05	0.00234829	0.28162	0.469211	0.187591	No	No	No
SERPING1	cg09061733	1.08823	0.264322	4.11705	8.933e-05	0.00237098	0.235757	0.373656	0.137899	No	No	No
CYP7B1	cg04418492	0.622095	0.151162	4.11542	8.98588e-05	0.00238227	0.158069	0.511059	0.352989	No	No	No
HCRTR2	cg13948987	0.649243	0.157785	4.11473	9.00831e-05	0.00238546	0.0905395	0.382172	0.291632	No	No	No
ZNF312	cg06423920	0.851221	0.206969	4.11279	9.07135e-05	0.00239938	0.108266	0.355775	0.247509	Yes	Yes	Yes
ELAVL2	cg23693510	0.995225	0.242023	4.11211	9.09361e-05	0.00240118	0.156528	0.338041	0.181512	No	Yes	Yes
IGF2AS	cg25163476	0.67132	0.163414	4.10809	9.22635e-05	0.0024264	0.12101	0.37144	0.250431	Yes	Yes	Yes
ZNF541	cg22341310	0.859564	0.209577	4.10143	9.45024e-05	0.0024796	0.332661	0.617309	0.284648	No	No	No
GRM7	cg04527363	0.695583	0.169637	4.10043	9.48413e-05	0.00248566	0.149073	0.386296	0.237222	Yes	Yes	Yes
DAAM2	cg01985396	1.01565	0.24814	4.09304	9.73962e-05	0.00254565	0.197135	0.339199	0.142064	NA	NA	NA
BTG4	cg01192900	0.527507	0.129081	4.08662	9.96678e-05	0.00259426	0.11431	0.386171	0.271861	No	Yes	No
ZNF285	cg09030119	0.673819	0.164896	4.08632	9.97762e-05	0.00259426	0.17816	0.462738	0.284578	No	No	No
ADARB2	cg05307923	0.655327	0.160449	4.08434	0.000100485	0.0026068	0.056282	0.381801	0.325519	Yes	Yes	Yes
OBSCN	cg19109050	0.976394	0.239203	4.08186	0.000101383	0.00262712	0.550465	0.727915	0.17745	No	No	No
ESX1	cg04721883	0.933589	0.228784	4.08066	0.000101824	0.00263556	0.504969	0.728081	0.223113	Yes	Yes	Yes
FLJ40365	cg02489552	1.02561	0.251467	4.07849	0.000102616	0.00264712	0.242832	0.418672	0.17584	No	No	No
CIDEB	cg13840968	1.29928	0.318598	4.07812	0.000102755	0.00264773	0.627174	0.786905	0.159731	No	No	No
FAM65A	cg02225847	2.10236	0.515914	4.07501	0.000103906	0.00267138	0.0818098	0.147825	0.0660152	Yes	No	No
SNRPN	cg02305723	1.19102	0.292273	4.07504	0.000103896	0.00267138	0.491656	0.671125	0.179469	No	No	No
FLJ12056	cg18006568	0.592222	0.145354	4.07434	0.000104156	0.00267482	0.10563	0.377599	0.271969	No	No	No
C10orf59	cg06981182	0.570194	0.14001	4.07252	0.000104837	0.00268929	0.13751	0.376356	0.238846	No	No	No
GRIK1	cg21816539	0.718004	0.176469	4.06872	0.000106275	0.00272012	0.0999364	0.289562	0.189626	Yes	Yes	Yes
HIST1H1A	cg10146929	1.26445	0.31084	4.06787	0.0001066	0.00272538	0.320651	0.515503	0.194852	No	No	No
ASAM	cg19096475	0.772818	0.190006	4.06733	0.000106806	0.00272761	0.495647	0.657158	0.161511	No	No	No
POU4F3	cg18482268	0.801567	0.197154	4.06568	0.000107437	0.00274068	0.197232	0.378761	0.181529	Yes	Yes	Yes
GGT6	cg22628873	0.970302	0.238735	4.06434	0.000107952	0.00275077	0.29318	0.419817	0.126637	No	No	No
FLJ43582	cg11653466	1.04792	0.258001	4.06169	0.000108984	0.00277398	0.288331	0.478479	0.190147	No	No	No
TFPI	cg16478145	1.8855	0.464348	4.06052	0.000109438	0.00278244	0.43101	0.501369	0.0703584	No	No	No
HOXD9	cg14991487	0.485465	0.119636	4.05787	0.000110482	0.00280588	0.0943603	0.474253	0.379893	Yes	Yes	Yes
C14orf48	cg24520070	0.989868	0.244033	4.05629	0.000111107	0.00281864	0.620013	0.815585	0.195571	No	No	No
GABRB1	cg18016365	0.866167	0.213574	4.05559	0.000111387	0.00282264	0.195	0.414588	0.219588	No	No	No
FSBP	cg26323655	2.01947	0.498387	4.052	0.000112824	0.0028559	0.365153	0.443708	0.0785552	No	No	No
EPHA10	cg07447922	0.617631	0.152444	4.05152	0.000113019	0.00285768	0.127681	0.454316	0.326635	Yes	No	Yes
CDH13	cg01880569	1.65357	0.408201	4.05088	0.000113277	0.0028579	0.310087	0.407293	0.0972063	Yes	No	No
ZNF577	cg22472290	1.11637	0.275569	4.05114	0.000113171	0.0028579	0.211322	0.306835	0.0955137	No	No	No
PLCD1	cg24868271	1.23921	0.306147	4.04777	0.000114543	0.00288352	0.538511	0.709253	0.170742	No	No	No
UCN	cg04527918	0.55279	0.136726	4.04304	0.00011649	0.00292932	0.235416	0.502709	0.267293	Yes	Yes	Yes
SSH3	cg22285621	1.09854	0.271789	4.04188	0.000116975	0.0029383	0.0376819	0.155578	0.117896	No	No	No
NTN2L	cg22721827	1.26537	0.313108	4.04134	0.0001172	0.00294072	0.163616	0.304745	0.141129	No	No	No
GLOXD1	cg26781150	0.833168	0.206239	4.03983	0.000117834	0.00294885	0.0311341	0.151537	0.120403	No	No	No
SCN2B	cg13348944	0.995791	0.24653	4.03922	0.000118089	0.00295012	0.253099	0.423042	0.169943	No	No	No
NID2	cg22881914	0.595362	0.147496	4.03645	0.00011926	0.00297616	0.271223	0.639876	0.368653	Yes	No	No
C1QTNF2	cg07816439	1.35335	0.335331	4.03588	0.000119504	0.00297901	0.131897	0.237393	0.105496	No	No	No
HEYL	cg06154570	1.11683	0.276795	4.03487	0.000119934	0.00298033	0.106908	0.249796	0.142888	No	No	Yes
PRKCDBP	cg18392783	0.746483	0.185007	4.03489	0.000119927	0.00298033	0.0864634	0.302141	0.215678	No	No	No
MYL5	cg18176712	1.48397	0.368234	4.02996	0.000122051	0.00302933	0.498613	0.612328	0.113715	No	No	No
PCDHB12	cg07899016	0.971326	0.241094	4.02882	0.000122547	0.00303835	0.333378	0.562433	0.229055	NA	NA	NA
CIDEA	cg20950011	0.718135	0.178576	4.02145	0.000125804	0.00310904	0.128538	0.374576	0.246038	Yes	Yes	Yes
CST11	cg06489008	1.51778	0.37751	4.02049	0.000126235	0.00311633	0.439678	0.598634	0.158956	No	No	No
FSTL3	cg10503234	1.62308	0.403738	4.02014	0.000126393	0.00311688	0.0772349	0.157559	0.0803236	No	No	No
MGC16372	cg10883621	1.21607	0.302557	4.01931	0.000126766	0.00312273	0.121073	0.236833	0.11576	No	No	No
SPARCL1	cg05350879	1.27883	0.318223	4.01867	0.000127055	0.00312316	0.370657	0.512581	0.141924	No	No	No
NELL1	cg20113732	0.566066	0.140857	4.01873	0.000127029	0.00312316	0.0486362	0.296894	0.248258	Yes	Yes	Yes
GOT2	cg13883681	1.02812	0.255866	4.01818	0.000127279	0.0031253	0.329537	0.498999	0.169462	No	No	No
DYRK2	cg21281799	1.12409	0.279831	4.01703	0.000127797	0.00313467	0.431173	0.607317	0.176144	No	No	No
CX3CL1	cg20427865	1.45409	0.362045	4.01632	0.000128121	0.00313926	0.171297	0.250774	0.0794766	No	No	No
PHKG2	cg13277179	3.40026	0.84696	4.01466	0.000128878	0.00315445	0.0604754	0.0939471	0.0334717	No	No	No
FLJ25444	cg04924696	1.54571	0.385204	4.0127	0.000129782	0.00317211	0.366287	0.479894	0.113607	No	Yes	No
LDOC1	cg20104776	1.25132	0.31188	4.01219	0.000130014	0.00317211	0.55529	0.659877	0.104587	No	No	No
OPCML	cg03923934	0.729413	0.181823	4.01167	0.000130255	0.00317462	0.124108	0.380129	0.256021	No	No	No
CDKL1	cg16077929	1.1403	0.284295	4.01098	0.000130574	0.00317901	0.283837	0.383199	0.0993618	No	No	No
LOC221091	cg15538427	1.2981	0.323985	4.00666	0.000132595	0.00321797	0.10774	0.238229	0.130489	No	No	No
STMN2	cg23326689	0.87905	0.219487	4.00502	0.000133366	0.00322987	0.336623	0.559049	0.222426	Yes	Yes	Yes
KIF5B	cg18292711	1.92757	0.481534	4.00298	0.000134337	0.00324996	0.359421	0.434003	0.0745827	No	No	No
NID2	cg01231779	0.448187	0.111998	4.00173	0.000134932	0.00326092	0.0517704	0.456853	0.405082	Yes	No	No
C21orf100	cg06940107	1.02196	0.255609	3.99815	0.000136656	0.00329564	0.314356	0.495321	0.180965	No	No	No
DNASE1L2	cg12619509	0.608507	0.152282	3.99591	0.000137745	0.00331842	0.175112	0.408929	0.233817	No	No	No
EFEMP1	cg20786074	0.922802	0.230957	3.99556	0.000137919	0.00331913	0.262959	0.401588	0.138629	No	No	No
CRH	cg20329958	1.8621	0.466388	3.9926	0.000139373	0.0033506	0.252412	0.335823	0.0834113	No	No	Yes
NAP1L3	cg00768439	1.01429	0.254074	3.99211	0.000139611	0.00335282	0.156924	0.335109	0.178185	No	No	No
MEG3	cg25836301	1.3561	0.340007	3.98846	0.000141429	0.00338584	0.505601	0.64466	0.13906	NA	NA	NA
P8	cg05590982	0.932533	0.233923	3.98649	0.000142417	0.00339553	0.179307	0.32569	0.146383	No	No	No
ICAM2	cg10275770	0.921735	0.231224	3.98633	0.000142501	0.00339553	0.334516	0.541611	0.207095	No	No	No
SCTR	cg15250797	1.04132	0.261231	3.98619	0.000142573	0.00339553	0.138756	0.236147	0.0973918	Yes	Yes	Yes
PCDHAC1	cg18902090	0.539991	0.135455	3.98651	0.000142408	0.00339553	0.0932964	0.384327	0.291031	No	No	No
MASP1	cg20725021	0.979593	0.245783	3.9856	0.000142871	0.00339557	0.21911	0.393156	0.174046	No	No	No
PLEKHB1	cg25288155	1.09248	0.274105	3.98564	0.000142851	0.00339557	0.441772	0.61696	0.175188	NA	NA	NA
ARL10	cg27092035	0.652848	0.163907	3.98303	0.000144171	0.00342294	0.0529686	0.234453	0.181484	No	No	Yes
PPP2R3A	cg07038400	1.62054	0.406981	3.98186	0.000144772	0.00343365	0.140996	0.205527	0.0645304	No	No	No
PCDHB15	cg10757144	1.16071	0.29163	3.98009	0.000145681	0.00345164	0.277958	0.454076	0.176118	No	No	No
NPPA	cg20202438	1.06366	0.267264	3.9798	0.000145831	0.00345164	0.458278	0.603008	0.144731	No	No	No
HBA1	cg10647513	0.834509	0.209742	3.97875	0.000146373	0.00346048	0.100505	0.288103	0.187598	Yes	Yes	Yes
GABRB2	cg01939681	0.635405	0.159717	3.97833	0.000146591	0.00346048	0.0663617	0.354895	0.288533	No	Yes	Yes
CRYGD	cg25356886	1.37117	0.344672	3.9782	0.000146657	0.00346048	0.508902	0.675047	0.166145	No	No	No
CYP26C1	cg26404725	1.611	0.4052	3.97582	0.000147895	0.00348254	0.584254	0.698462	0.114208	Yes	Yes	Yes
SERPINB5	cg00226904	1.38275	0.347873	3.97486	0.000148396	0.00348654	0.348657	0.481493	0.132836	No	No	No
LMAN1L	cg24447890	0.933032	0.234747	3.97463	0.00014852	0.00348654	0.524095	0.754608	0.230514	No	No	No
FBS1	cg19464252	1.61163	0.405509	3.97433	0.000148678	0.00348667	0.538193	0.666403	0.128209	No	No	No
C20orf161	cg06425868	1.3847	0.34866	3.97149	0.000150175	0.00351819	0.107754	0.197851	0.0900972	No	No	No
GPR26	cg07036530	0.958184	0.241332	3.9704	0.000150753	0.00352744	0.3025	0.505762	0.203263	No	No	Yes
C10orf116	cg12261786	1.05159	0.264872	3.97017	0.000150877	0.00352744	0.276314	0.467274	0.19096	No	No	No
PSPN	cg10280342	0.678774	0.171032	3.96871	0.000151658	0.00353525	0.292349	0.589949	0.2976	No	No	No
TCEAL2	cg23163644	0.992005	0.249936	3.96903	0.000151485	0.00353525	0.167205	0.342748	0.175543	Yes	No	No
TIMP3	cg05260966	0.661926	0.166855	3.96706	0.00015254	0.00354825	0.145642	0.399038	0.253396	No	No	No
PMF1	cg24008892	1.27544	0.321785	3.96365	0.00015439	0.00358403	0.589453	0.69981	0.110357	No	No	No
SRPX2	cg18727700	1.41688	0.357974	3.95806	0.000157459	0.00364354	0.373689	0.4826	0.108911	Yes	No	No
HBA2	cg16263182	0.847213	0.214082	3.95741	0.000157819	0.00364354	0.101954	0.28876	0.186806	Yes	Yes	Yes
DIAPH2	cg17694877	1.13812	0.28767	3.95634	0.000158418	0.00365169	0.179852	0.333447	0.153595	No	No	No
CDH1	cg20716119	3.48096	0.880512	3.95333	0.000160105	0.00368686	0.0347615	0.0643769	0.0296154	No	No	No
USP51	cg25424556	1.10647	0.279992	3.9518	0.000160969	0.00369633	0.387201	0.494893	0.107692	No	No	No
SMARCA1	cg24447042	1.45723	0.368852	3.95073	0.000161581	0.00370196	0.452669	0.553309	0.10064	No	No	No
RBPSUHL	cg21835643	0.581753	0.147661	3.93979	0.00016792	0.00383605	0.232996	0.496619	0.263623	No	No	No
UNQ689	cg17536071	2.01347	0.511199	3.93871	0.000168555	0.00384672	0.343782	0.398853	0.0550706	No	No	No
DKFZP586H2123	cg14642338	1.20913	0.307166	3.9364	0.000169929	0.00386511	0.441717	0.603484	0.161766	No	No	No
CHAT	cg18592174	0.789549	0.200585	3.93623	0.000170034	0.00386511	0.108473	0.323476	0.215004	No	No	No
WDR17	cg18443378	0.468254	0.119005	3.93473	0.000170927	0.00387994	0.098719	0.36684	0.268121	No	No	No
DXS9879E	cg25410279	1.42774	0.362871	3.93457	0.000171024	0.00387994	0.481745	0.563174	0.0814294	No	No	No
ELAVL3	cg25434223	0.78119	0.198567	3.93414	0.000171283	0.00388196	0.110872	0.281624	0.170752	Yes	No	Yes
ISL1	cg21410991	0.782094	0.198836	3.93336	0.000171753	0.00388878	0.169566	0.421263	0.251696	Yes	Yes	Yes
GDAP1L1	cg04448487	0.630205	0.160391	3.92918	0.00017429	0.00393847	0.177738	0.479882	0.302144	No	No	No
PTPRJ	cg00394658	1.30638	0.332678	3.92687	0.000175708	0.00396659	0.173199	0.298781	0.125582	No	No	No
SLC41A2	cg27149093	1.54669	0.393966	3.92594	0.000176285	0.00397571	0.409438	0.518161	0.108723	No	No	No
FLJ90575	cg03782453	0.831459	0.211802	3.92565	0.000176464	0.00397586	0.158195	0.295964	0.13777	No	No	Yes
LSAMP	cg14294758	0.83695	0.21353	3.91959	0.000180256	0.00404936	0.196651	0.400067	0.203417	No	No	No
C1orf90	cg12278770	1.30853	0.333932	3.91855	0.000180911	0.00406011	0.3294	0.485939	0.156539	No	No	No
CSF2RB	cg16356956	1.50444	0.384164	3.91614	0.000182442	0.00409008	0.664167	0.783584	0.119417	No	No	No
FBXO25	cg01680762	1.36823	0.349816	3.91128	0.000185577	0.00414455	0.232156	0.315079	0.0829229	No	No	Yes
SUSD2	cg23349242	0.872914	0.223214	3.91067	0.000185974	0.00414938	0.321348	0.436913	0.115565	No	No	No
LTBR	cg15784615	1.28492	0.328604	3.91025	0.000186247	0.00415145	0.131096	0.227218	0.0961228	No	No	No
SOX3	cg02847500	1.04863	0.268267	3.9089	0.00018713	0.00416304	0.518439	0.679794	0.161355	Yes	Yes	No
WNK3	cg12707233	1.2238	0.313105	3.9086	0.000187321	0.00416326	0.551846	0.650153	0.0983066	No	No	No
HIST1H2BB	cg21250296	0.616277	0.157726	3.90725	0.000188207	0.00417891	0.0907036	0.376163	0.285459	No	No	No
NT5C1A	cg21280510	1.04446	0.267468	3.90501	0.00018969	0.00420369	0.320503	0.507358	0.186855	Yes	Yes	Yes
TGFBI	cg00386408	0.850894	0.218043	3.90242	0.000191418	0.0042379	0.128033	0.281862	0.153829	No	No	No
ACOT12	cg00540769	0.796983	0.204315	3.90076	0.000192528	0.00425838	0.262601	0.463726	0.201125	No	No	No
PHACTR3	cg20674577	0.756583	0.193975	3.90041	0.000192762	0.00425945	0.197733	0.40648	0.208747	No	No	No
WT1	cg16092786	0.669681	0.171724	3.89974	0.000193213	0.00426532	0.0827098	0.380335	0.297625	Yes	Yes	Yes
SOX14	cg16428251	0.729402	0.187078	3.89892	0.000193773	0.00427356	0.150865	0.40996	0.259095	Yes	Yes	Yes
PYCARD	cg15468095	0.981845	0.251905	3.89768	0.00019461	0.0042879	0.102175	0.19714	0.0949646	Yes	No	No
HAAO	cg01561916	0.553059	0.141952	3.89611	0.000195683	0.00430741	0.16736	0.553711	0.386352	No	No	No
LHB	cg12566415	2.06512	0.530526	3.89259	0.000198097	0.00435638	0.760124	0.825341	0.0652164	No	No	No
DCC	cg05420896	1.11858	0.287461	3.89125	0.000199025	0.0043726	0.284294	0.447539	0.163244	Yes	Yes	Yes
PTGES	cg26672426	0.982647	0.252567	3.89063	0.000199458	0.00437792	0.15454	0.276701	0.122162	No	No	No
ACOT4	cg26780333	1.30307	0.335087	3.88874	0.000200776	0.00440264	0.0268014	0.143339	0.116537	No	No	No
HOXA4	cg24169822	0.804587	0.206953	3.88778	0.000201449	0.00440898	0.40988	0.546518	0.136638	No	Yes	Yes
DPYSL4	cg07295678	0.574053	0.147716	3.88619	0.000202569	0.00442084	0.0516283	0.29781	0.246182	No	No	No
SAT	cg20308511	1.86226	0.479193	3.88625	0.000202528	0.00442084	0.183538	0.285981	0.102442	No	No	No
KCNA4	cg03506489	0.858171	0.220858	3.88562	0.000202973	0.00442545	0.0877268	0.249501	0.161774	NA	NA	NA
HTR4	cg07102705	0.476311	0.122601	3.88507	0.000203366	0.00442981	0.0542663	0.312743	0.258477	No	No	No
PAX7	cg07536847	0.719456	0.185244	3.88382	0.00020425	0.00444486	0.179891	0.459689	0.279798	Yes	Yes	Yes
DOK5	cg11822659	0.598764	0.154224	3.88243	0.000205246	0.00445808	0.102904	0.384236	0.281332	No	No	No
SST	cg02164046	0.563032	0.145032	3.88213	0.000205456	0.00445842	0.0970649	0.348847	0.251782	No	No	No
GABARAP	cg23983449	1.26357	0.325551	3.88132	0.000206037	0.0044668	0.142652	0.244654	0.102002	No	No	No
LAG3	cg01820374	0.967889	0.249598	3.87779	0.000208586	0.00450604	0.401055	0.619243	0.218187	NA	NA	NA
NEFL	cg13266631	0.895141	0.230812	3.87823	0.000208272	0.00450604	0.192404	0.396945	0.204541	Yes	Yes	Yes
FLJ14834	cg24891133	0.529219	0.136477	3.87773	0.000208632	0.00450604	0.0503783	0.305476	0.255098	No	No	No
KCNA2	cg22165175	1.68809	0.435377	3.87731	0.000208939	0.00450842	0.0682234	0.160258	0.0920342	No	No	No
SYT6	cg05368341	0.582802	0.150339	3.87658	0.000209468	0.00451561	0.0710515	0.373953	0.302902	Yes	No	Yes
K6IRS2	cg06494782	0.839981	0.216707	3.8761	0.000209815	0.00451885	0.378715	0.605187	0.226472	No	No	No
GEFT	cg11452221	0.803876	0.207415	3.87569	0.000210121	0.00452119	0.145958	0.300527	0.154569	No	No	No
HOXA9	cg07778029	0.600574	0.154996	3.87478	0.000210783	0.0045312	0.10671	0.415019	0.308308	No	Yes	Yes
ZNF710	cg01185080	0.890541	0.229956	3.87265	0.000212352	0.00455291	0.193216	0.320429	0.127213	No	No	No
FLJ43505	cg18665384	1.3896	0.359094	3.86974	0.000214514	0.0045899	0.541644	0.71115	0.169506	NA	NA	NA
TRAM1	cg25974617	1.15588	0.298686	3.86987	0.000214413	0.0045899	0.222687	0.330444	0.107757	No	No	No
NNAT	cg23566503	1.80857	0.467551	3.86817	0.000215686	0.00460932	0.587253	0.705052	0.117799	No	No	No
HLF	cg15835232	0.715699	0.185141	3.8657	0.000217548	0.00464185	0.054887	0.183979	0.129092	Yes	Yes	No
HIST1H4F	cg05159188	0.853587	0.22112	3.86029	0.00022167	0.00470357	0.239441	0.481809	0.242368	No	Yes	No
MAGEH1	cg18869368	0.933734	0.242104	3.85676	0.000224409	0.00475729	0.267657	0.468654	0.200997	No	No	No
TCAP	cg10986043	0.896103	0.232568	3.85309	0.000227285	0.0048138	0.482095	0.599005	0.11691	No	No	No
APOBEC3C	cg07186138	0.755241	0.196065	3.85199	0.00022815	0.00482353	0.0713985	0.355753	0.284354	No	No	No
PDIA5	cg10098541	1.35292	0.351227	3.85197	0.000228164	0.00482353	0.1656	0.252364	0.0867639	No	No	No
GLRA1	cg00059225	1.36257	0.354022	3.84884	0.000230653	0.00486719	0.118293	0.230574	0.112281	No	No	No
PTCH2	cg15329642	0.76883	0.199839	3.84724	0.000231935	0.00488975	0.162697	0.354853	0.192156	No	No	No
TTR	cg08521225	1.38077	0.359157	3.84448	0.000234171	0.00492333	0.520232	0.663976	0.143743	No	No	No
FBLN2	cg16604516	1.29019	0.335631	3.84409	0.000234488	0.00492547	0.0783908	0.187765	0.109374	No	No	No
RASL12	cg03349935	1.31354	0.341997	3.84079	0.000237181	0.00496678	0.687235	0.823142	0.135907	No	No	No
NT5C3L	cg18408487	0.983345	0.256031	3.84073	0.000237229	0.00496678	0.507323	0.670781	0.163458	No	No	No
DCHS2	cg04517429	0.850115	0.22139	3.83989	0.000237915	0.0049747	0.185814	0.379508	0.193695	Yes	Yes	Yes
PRDM12	cg09191327	0.600972	0.156541	3.83908	0.000238586	0.00498149	0.0655969	0.245167	0.17957	Yes	Yes	Yes
AR	cg14807303	1.13047	0.294497	3.83866	0.000238936	0.00498149	0.399973	0.534065	0.134092	NA	NA	NA
LIMS3	cg18879041	0.798667	0.208043	3.83895	0.000238694	0.00498149	0.176923	0.357102	0.18018	No	No	No
GPR12	cg22179082	0.822393	0.214314	3.83732	0.000240041	0.0049964	0.112287	0.270569	0.158282	Yes	Yes	Yes
LEFTY2	cg20661303	0.733656	0.191278	3.83555	0.000241519	0.00501353	0.27414	0.501624	0.227484	NA	NA	NA
FHL2	cg27223827	0.984479	0.256644	3.83598	0.000241163	0.00501353	0.283283	0.508662	0.225378	No	No	No
NCOR2	cg22820108	1.10574	0.288328	3.83502	0.000241964	0.00501823	0.209055	0.29305	0.0839954	No	No	No
ADAM12	cg11668923	0.46045	0.120123	3.83315	0.000243532	0.0050371	0.100988	0.447542	0.346554	Yes	No	No
HSPA1A	cg00929855	0.431559	0.112626	3.83178	0.00024469	0.0050565	0.107836	0.534937	0.427102	No	Yes	Yes
KAZALD1	cg15302379	1.16042	0.302879	3.8313	0.000245097	0.00506036	0.478924	0.541839	0.0629157	Yes	Yes	Yes
UNQ2446	cg10574499	0.799177	0.208737	3.82862	0.000247373	0.00509817	0.233292	0.469291	0.235999	No	No	No
ZNF205	cg13928306	1.52721	0.398879	3.82876	0.000247256	0.00509817	0.0667959	0.132061	0.0652652	No	No	No
MALL	cg01615704	1.32643	0.346729	3.82555	0.000250015	0.00514331	0.0739116	0.199884	0.125973	No	No	No
TBX20	cg02008154	0.597587	0.156207	3.82562	0.000249949	0.00514331	0.155502	0.384527	0.229025	No	Yes	Yes
TAL1	cg19797376	0.960008	0.250963	3.82529	0.000250235	0.00514331	0.260159	0.450559	0.1904	Yes	Yes	Yes
C20orf102	cg19438514	0.913908	0.238969	3.82438	0.000251021	0.00515485	0.219944	0.387211	0.167267	No	No	No
COL19A1	cg06321883	0.623724	0.163231	3.82112	0.000253868	0.00520401	0.134056	0.289851	0.155795	No	Yes	No
B4GALT1	cg05779272	1.09831	0.287524	3.8199	0.000254934	0.00522118	0.269425	0.431126	0.161701	No	No	No
BTBD3	cg14603345	0.992028	0.25977	3.81888	0.000255838	0.00523036	0.0881307	0.210826	0.122695	No	No	No
COX7C	cg20938689	1.4554	0.381083	3.81911	0.00025563	0.00523036	0.271389	0.368238	0.0968499	No	No	No
KCNE4	cg09835085	0.914374	0.239538	3.81725	0.00025728	0.00524584	0.159082	0.258632	0.09955	No	No	No
SLITRK1	cg25938646	0.576602	0.151095	3.81615	0.000258259	0.00526113	0.176901	0.426905	0.250005	Yes	Yes	Yes
C6orf182	cg08550724	1.38514	0.363625	3.80925	0.000264472	0.00538292	0.502523	0.64192	0.139397	No	No	No
C21orf84	cg23732182	0.905945	0.237881	3.8084	0.000265246	0.00539389	0.226286	0.342377	0.116091	No	No	No
CCK	cg16864658	0.67811	0.178098	3.8075	0.000266066	0.00540578	0.19329	0.361498	0.168208	NA	NA	NA
IRXL1	cg14614211	0.635968	0.16705	3.80704	0.000266488	0.00540957	0.221909	0.43799	0.216081	Yes	Yes	Yes
MS4A10	cg17397420	1.66804	0.438178	3.80677	0.000266737	0.00540983	0.323256	0.410173	0.0869165	No	No	No
SCUBE2	cg01081263	0.928248	0.243907	3.80575	0.000267676	0.00542409	0.189576	0.378155	0.188579	No	No	No
KCNJ3	cg24693368	0.603585	0.158678	3.80383	0.000269451	0.00545525	0.105726	0.328871	0.223145	Yes	No	Yes
EFCAB1	cg22836229	0.818676	0.215304	3.80242	0.000270767	0.00547429	0.0866438	0.196213	0.109569	No	No	Yes
LCTL	cg25665697	1.05695	0.277976	3.80231	0.000270868	0.00547429	0.214141	0.360764	0.146624	No	No	No
PRRX2	cg04713521	0.622212	0.163655	3.80197	0.000271187	0.00547591	0.0942718	0.288216	0.193944	No	No	No
ADRB3	cg01386493	1.1327	0.298164	3.79891	0.000274057	0.0055193	0.304698	0.445201	0.140503	Yes	Yes	Yes
SIX3	cg13163729	1.02155	0.268987	3.79778	0.000275116	0.00553576	0.0807625	0.233078	0.152316	Yes	Yes	Yes
PEG3	cg14849423	1.43238	0.377342	3.79597	0.000276837	0.00556552	0.599887	0.721122	0.121235	No	No	No
DYDC1	cg17703212	0.578705	0.152511	3.7945	0.000278236	0.00557555	0.154562	0.35072	0.196158	No	No	No
SNCG	cg21012874	0.711379	0.187445	3.79513	0.000277639	0.00557555	0.235117	0.372218	0.137102	No	No	No
ACOT11	cg21448423	1.3922	0.366907	3.79443	0.000278308	0.00557555	0.309969	0.452993	0.143024	NA	NA	NA
ELOVL3	cg00431050	1.11313	0.293477	3.79291	0.000279761	0.0055949	0.30577	0.435267	0.129497	No	No	Yes
FAM12B	cg12376406	1.27585	0.336362	3.79308	0.000279604	0.0055949	0.155243	0.281054	0.12581	No	No	No
ZIC3	cg25410053	1.53904	0.405799	3.79261	0.000280053	0.00559586	0.628698	0.764363	0.135664	No	No	No
BTBD5	cg00660989	0.780599	0.205902	3.79112	0.00028149	0.0056148	0.203803	0.406447	0.202644	No	No	No
FLJ46365	cg03167883	1.09289	0.288322	3.79052	0.000282073	0.00562155	0.309913	0.465441	0.155528	No	No	No
AXUD1	cg02254461	1.0041	0.265002	3.78904	0.000283505	0.0056452	0.333211	0.446108	0.112896	No	No	No
C20orf186	cg21519900	1.20651	0.318622	3.78665	0.000285846	0.00568195	0.197302	0.302349	0.105046	No	No	No
LRP3	cg08700306	1.11776	0.295266	3.78559	0.000286881	0.00569759	0.180739	0.268514	0.0877745	No	No	No
PPP1R16A	cg12515371	2.05364	0.542791	3.78348	0.000288972	0.00572922	0.73491	0.823768	0.0888572	No	No	No
NRIP2	cg00830029	0.670032	0.177418	3.77657	0.000295893	0.00585334	0.161194	0.346753	0.185559	No	No	No
NFIX	cg03172991	1.48236	0.392552	3.77622	0.000296253	0.00585334	0.523425	0.630422	0.106997	Yes	Yes	Yes
MGC2747	cg25903122	1.11298	0.294716	3.77646	0.000296009	0.00585334	0.619724	0.737933	0.118209	No	No	No
GM632	cg26760212	1.80253	0.477256	3.77687	0.000295593	0.00585334	0.165067	0.228089	0.0630225	No	No	No
KIAA1446	cg13673514	0.956981	0.253564	3.77412	0.00029839	0.00588544	0.196875	0.364996	0.168121	No	No	No
NDN	cg18602919	1.24276	0.32928	3.77419	0.00029832	0.00588544	0.66266	0.788456	0.125796	No	No	No
PAM	cg20131596	0.908629	0.240936	3.77125	0.000301342	0.00593346	0.18629	0.307701	0.121411	No	No	No
BDNF	cg16257091	0.974379	0.258534	3.76885	0.000303821	0.00597715	0.209953	0.377738	0.167785	No	No	No
RHBDD1	cg10523019	0.649913	0.172557	3.76636	0.000306422	0.00602316	0.170736	0.45676	0.286024	No	No	No
ATP10A	cg26062856	0.851161	0.226071	3.76502	0.000307831	0.00604568	0.536832	0.750133	0.213301	No	No	No
A2BP1	cg19378133	0.648953	0.172472	3.76267	0.000310322	0.00608419	0.197779	0.498472	0.300692	No	No	No
APOD	cg21084260	1.82633	0.485522	3.76159	0.00031147	0.00609628	0.32329	0.409534	0.0862443	NA	NA	NA
JPH4	cg02916816	1.03766	0.275853	3.76165	0.0003114	0.00609628	0.0992843	0.266795	0.167511	No	No	No
APCDD1	cg19264571	0.874009	0.232389	3.76097	0.000312121	0.00610019	0.224557	0.396972	0.172415	No	No	No
FAM83F	cg21771250	0.882373	0.234689	3.75975	0.000313431	0.00611903	0.354571	0.493489	0.138918	No	No	No
LHCGR	cg12351433	0.719562	0.191518	3.75715	0.000316224	0.0061683	0.202868	0.432882	0.230014	No	No	No
LAMB2	cg01919208	1.25865	0.335094	3.7561	0.000317358	0.00618315	0.143366	0.230042	0.0866763	No	No	No
FLJ23514	cg16404106	0.849777	0.226263	3.7557	0.000317793	0.00618315	0.243842	0.50023	0.256388	No	No	No
HNT	cg20881910	0.489525	0.130364	3.75505	0.000318499	0.00619164	0.154094	0.487586	0.333492	NA	NA	NA
HFE2	cg06589885	0.709495	0.189026	3.75343	0.000320265	0.00621544	0.258579	0.477826	0.219247	No	No	No
SLC9A3	cg23061578	0.788423	0.210097	3.75266	0.000321111	0.0062266	0.155033	0.32027	0.165236	Yes	Yes	Yes
LRFN5	cg04784672	0.463295	0.123542	3.75011	0.000323921	0.00627579	0.0743278	0.341877	0.26755	Yes	Yes	Yes
CCND2	cg12382902	0.522339	0.139377	3.74766	0.000326641	0.00632315	0.0491164	0.265487	0.21637	No	No	No
C8orf31	cg04612566	1.18128	0.31534	3.74606	0.000328426	0.006347	0.209077	0.280707	0.0716298	No	No	No
OPRK1	cg01281904	1.08923	0.290911	3.74422	0.000330496	0.00636968	0.274404	0.399842	0.125438	Yes	No	No
NRG1	cg17457560	0.476801	0.127358	3.74378	0.000330987	0.00636968	0.0595364	0.333692	0.274156	Yes	Yes	Yes
DKK2	cg01471384	0.720774	0.19258	3.74272	0.000332192	0.00637683	0.0455543	0.192445	0.14689	Yes	Yes	Yes
CRHR2	cg04922810	0.647184	0.172908	3.74293	0.000331951	0.00637683	0.0675688	0.268777	0.201208	No	No	No
KCNJ9	cg08665772	0.912123	0.243691	3.74295	0.000331928	0.00637683	0.253989	0.416081	0.162092	No	No	Yes
FLJ39599	cg08349806	0.647089	0.172907	3.74241	0.000332537	0.00637812	0.145883	0.35292	0.207037	No	No	No
BGLAP	cg04356968	4.42057	1.18268	3.73776	0.000337844	0.00647451	0.819066	0.845722	0.0266557	No	No	No
GABBR2	cg07903918	0.534884	0.14316	3.73627	0.000339562	0.00649117	0.138683	0.446947	0.308263	Yes	No	Yes
FLJ13265	cg27383956	0.702543	0.188127	3.7344	0.000341733	0.00652724	0.297652	0.43423	0.136578	No	No	No
CHFR	cg20535781	1.19234	0.31934	3.73378	0.000342459	0.00653025	0.296271	0.427971	0.1317	No	No	No
ISG20L1	cg26561254	1.48931	0.39887	3.73381	0.000342424	0.00653025	0.177728	0.244704	0.0669766	NA	NA	NA
PRDM14	cg10457247	0.740449	0.198557	3.72915	0.000347889	0.00661352	0.110159	0.388434	0.278275	No	Yes	No
CYP2E1	cg13315147	0.561522	0.150585	3.72894	0.00034814	0.00661352	0.22076	0.56973	0.34897	No	No	No
FLJ32569	cg14893161	0.658884	0.176671	3.72945	0.000347543	0.00661352	0.409785	0.660531	0.250746	No	No	No
TMEM88	cg23033845	2.18764	0.586682	3.72884	0.000348266	0.00661352	0.759768	0.820716	0.0609476	Yes	Yes	Yes
LEFTY2	cg22462235	0.986411	0.26456	3.7285	0.000348665	0.00661563	0.288778	0.424245	0.135466	NA	NA	NA
RCN1	cg12311132	2.00651	0.538647	3.7251	0.000352719	0.00667598	0.129669	0.186734	0.0570652	No	No	No
MTHFR	cg14472778	1.40549	0.377254	3.72558	0.000352145	0.00667598	0.316995	0.436715	0.11972	No	No	No
MMRN2	cg22545356	1.66809	0.447777	3.72526	0.00035252	0.00667598	0.622629	0.714235	0.0916069	No	No	No
PON3	cg10329418	0.933764	0.250842	3.72252	0.000355823	0.00672365	0.319478	0.541783	0.222306	No	No	No
TNKS1BP1	cg24855780	0.775804	0.208397	3.72272	0.000355578	0.00672365	0.190017	0.348691	0.158674	NA	NA	NA
PSTPIP1	cg26025891	0.884967	0.237774	3.72188	0.0003566	0.0067328	0.26883	0.428612	0.159782	No	No	No
IRXL1	cg02161900	0.858553	0.230727	3.72108	0.000357564	0.00674544	0.288842	0.520442	0.2316	Yes	Yes	Yes
GNAS	cg04457481	1.1437	0.307507	3.71928	0.000359763	0.00678136	0.494691	0.642829	0.148138	Yes	No	No
LY6K	cg26976437	0.712705	0.191695	3.71791	0.00036144	0.00680739	0.245252	0.385626	0.140374	No	No	No
DMPK	cg10857774	0.782999	0.210649	3.71707	0.000362462	0.00682104	0.362567	0.598203	0.235637	No	No	No
DBC1	cg25935911	0.641283	0.172541	3.71669	0.000362935	0.00682435	0.385783	0.616335	0.230552	No	No	No
OLFM1	cg27286999	0.757097	0.203802	3.71487	0.00036519	0.00686112	0.0836048	0.324541	0.240936	No	No	No
HMGCS2	cg10212621	1.08962	0.293532	3.71212	0.000368612	0.00691975	0.215378	0.298544	0.0831662	No	No	No
ECM2	cg24105685	1.72395	0.464613	3.71051	0.000370626	0.0069462	0.370587	0.457181	0.0865938	NA	NA	NA
THPO	cg09736922	1.28765	0.347319	3.7074	0.000374557	0.00700843	0.643133	0.782302	0.139169	No	No	No
LACTB	cg00616135	0.782099	0.211011	3.70644	0.00037577	0.00701399	0.312132	0.501103	0.188971	No	No	No
GRM1	cg06015218	0.804824	0.217131	3.70662	0.00037554	0.00701399	0.178507	0.399348	0.220841	No	No	No
PTGDR	cg24989962	0.534001	0.144072	3.70648	0.000375721	0.00701399	0.188017	0.481806	0.293789	Yes	Yes	Yes
MOS	cg22411207	0.765848	0.206792	3.70347	0.000379575	0.00707351	0.0782201	0.285783	0.207563	No	No	No
RCBTB2	cg25165199	1.65196	0.446164	3.70258	0.000380718	0.00708904	0.344971	0.472284	0.127313	No	No	No
MEST	cg17347253	1.39227	0.376104	3.70182	0.000381702	0.00710134	0.362054	0.481985	0.119931	No	No	No
DRD5	cg21279601	0.776596	0.209836	3.70096	0.000382812	0.00710498	0.428477	0.660087	0.23161	Yes	Yes	Yes
ZNF545	cg15383087	1.41097	0.381408	3.69938	0.000384867	0.00713188	0.403147	0.515025	0.111878	No	No	No
CYP1B1	cg25856383	0.538345	0.145587	3.69775	0.000386987	0.00715356	0.0882033	0.400243	0.312039	Yes	Yes	No
SORBS2	cg20544605	0.759154	0.205467	3.69476	0.000390921	0.00721414	0.359753	0.488606	0.128853	No	No	No
PPP1R16A	cg22563697	2.85059	0.771567	3.69455	0.000391207	0.00721414	0.832575	0.884984	0.0524083	No	No	No
GABRA3	cg24995836	0.972869	0.2633	3.6949	0.000390742	0.00721414	0.355011	0.511963	0.156952	No	No	No
FLJ27365	cg07546360	1.12798	0.305661	3.69029	0.000396878	0.00730698	0.136218	0.274313	0.138094	No	No	No
C18orf34	cg05245861	0.605746	0.164181	3.68951	0.000397925	0.00732038	0.0551729	0.292877	0.237704	No	No	No
ADORA2A	cg21949305	0.763729	0.207019	3.68917	0.000398378	0.00732286	0.318475	0.523236	0.204761	No	No	No
LAS1L	cg00947275	1.20041	0.325449	3.68849	0.000399297	0.00732802	0.212542	0.312121	0.0995794	No	No	No
TNFSF12-TNFSF13	cg00031162	1.47764	0.400771	3.687	0.000401314	0.00735809	0.350926	0.481768	0.130842	NA	NA	NA
DMP1	cg22416721	0.999666	0.271436	3.68288	0.000406931	0.00744431	0.355659	0.510477	0.154819	NA	NA	NA
SLC6A11	cg15284635	1.00807	0.273819	3.68152	0.000408812	0.00746682	0.376125	0.533141	0.157017	Yes	No	Yes
UPF3B	cg15681351	0.975965	0.265095	3.68157	0.000408735	0.00746682	0.337145	0.46693	0.129785	No	No	No
RIN2	cg17016000	1.21733	0.330856	3.67935	0.000411807	0.00751554	0.315404	0.467816	0.152412	NA	NA	NA
TRPC4	cg21081971	0.892328	0.242641	3.67756	0.000414302	0.00754907	0.285833	0.402457	0.116624	No	No	No
THBD	cg24562819	0.498077	0.135481	3.67635	0.000415998	0.00756824	0.0505162	0.24225	0.191734	Yes	Yes	Yes
SLC32A1	cg08535373	0.728039	0.198034	3.67634	0.000416013	0.00756824	0.166246	0.368179	0.201933	Yes	Yes	Yes
GABRB2	cg16509658	0.537946	0.146356	3.67561	0.000417041	0.00758093	0.0811387	0.366912	0.285773	No	Yes	Yes
SYT9	cg01806928	0.711256	0.193542	3.67495	0.000417963	0.00758864	0.317443	0.500152	0.182709	No	No	No
URB	cg02905245	1.44797	0.394022	3.67484	0.000418126	0.00758864	0.190908	0.253521	0.0626137	No	No	No
HTR7	cg06291867	0.671407	0.182778	3.67336	0.000420217	0.00761455	0.110245	0.313325	0.20308	Yes	Yes	Yes
GALR1	cg05896682	0.771104	0.209932	3.6731	0.000420572	0.00761497	0.248686	0.446012	0.197326	NA	NA	NA
KLHL1	cg20523861	0.684146	0.186336	3.67157	0.000422751	0.00764238	0.253061	0.471496	0.218435	No	No	Yes
SNRPN	cg25978208	1.60426	0.436917	3.67176	0.000422482	0.00764238	0.640395	0.766336	0.125942	No	No	No
C9orf138	cg22937320	1.86432	0.508067	3.66943	0.000425814	0.00769042	0.781613	0.875494	0.0938814	No	No	No
PRKCB1	cg05436658	0.509754	0.13897	3.66809	0.000427732	0.00770828	0.141189	0.388449	0.24726	No	Yes	Yes
LOC283487	cg22131172	1.5832	0.431614	3.66809	0.000427739	0.00770828	0.104626	0.16664	0.0620142	NA	NA	NA
SCN4B	cg17186803	0.918962	0.250633	3.66656	0.000429943	0.00772979	0.253421	0.407711	0.15429	Yes	Yes	Yes
GNPDA1	cg00145118	1.26844	0.345975	3.66626	0.000430381	0.0077316	0.213785	0.34627	0.132485	No	No	No
CDH10	cg01058368	1.21507	0.331654	3.66368	0.000434127	0.00777456	0.338645	0.417945	0.0793001	No	No	No
TERT	cg17166338	1.12068	0.305877	3.66384	0.0004339	0.00777456	0.543421	0.727909	0.184489	No	No	No
LOC92689	cg20484352	1.49027	0.406833	3.6631	0.000434981	0.00777975	0.0861842	0.155839	0.069655	No	No	No
ABLIM3	cg25821963	0.433951	0.118468	3.66302	0.000435094	0.00777975	0.119051	0.433324	0.314272	No	No	No
FLI1	cg17872757	0.390847	0.106715	3.66253	0.000435811	0.00778045	0.104461	0.412923	0.308462	Yes	Yes	Yes
GLRX	cg03852144	0.85788	0.234311	3.66128	0.000437649	0.00780719	0.28956	0.501354	0.211793	No	No	No
SLC13A2	cg11653858	1.3513	0.369353	3.65856	0.000441673	0.00787286	0.691901	0.81947	0.127568	No	No	No
UNQ9433	cg17162024	0.510754	0.139648	3.65744	0.000443338	0.00789028	0.0925917	0.315159	0.222568	Yes	Yes	Yes
PLEKHB1	cg02254407	1.12727	0.308425	3.65493	0.000447091	0.00793862	0.588082	0.758395	0.170313	NA	NA	NA
RBMX	cg12517167	1.78975	0.489664	3.65505	0.000446914	0.00793862	0.552721	0.619263	0.0665425	No	No	No
C10orf72	cg02569613	0.467275	0.127882	3.65395	0.000448562	0.0079463	0.0854457	0.367881	0.282436	No	Yes	No
CHODL	cg24130010	0.573757	0.15701	3.65427	0.000448084	0.0079463	0.200414	0.408398	0.207984	Yes	Yes	Yes
PCDH11Y	cg08455548	1.10177	0.30175	3.65126	0.00045263	0.00800435	0.184247	0.314551	0.130304	Yes	No	No
HK1	cg16001913	1.18897	0.325716	3.65034	0.000454029	0.00801841	0.389528	0.527213	0.137685	No	No	No
RELN	cg17923358	0.548985	0.150414	3.64982	0.000454833	0.00802026	0.108339	0.372678	0.26434	No	Yes	No
PCDHA13	cg26556719	0.924526	0.253296	3.64998	0.000454578	0.00802026	0.245062	0.473396	0.228333	No	No	No
LOC124842	cg18338311	0.421828	0.11565	3.64746	0.000458443	0.00805916	0.0570126	0.37466	0.317648	Yes	Yes	Yes
JAM3	cg24625128	0.587883	0.161315	3.64433	0.000463285	0.00813182	0.075443	0.338731	0.263288	No	No	No
RAPSN	cg09163021	1.0979	0.301383	3.64286	0.000465563	0.00815933	0.652112	0.756111	0.103999	No	No	No
TBC1D1	cg25608041	0.784669	0.215438	3.64221	0.000466593	0.00817114	0.228652	0.364725	0.136074	Yes	No	No
GUCY1A3	cg02210887	1.12335	0.308493	3.64143	0.000467815	0.00817889	0.440852	0.578621	0.137768	Yes	Yes	Yes
NPFF	cg14662756	1.85872	0.510423	3.64153	0.000467646	0.00817889	0.676681	0.765294	0.0886129	No	No	No
WIT-1	cg25577842	0.847607	0.23278	3.64124	0.000468104	0.00817889	0.115181	0.332055	0.216874	Yes	Yes	Yes
ANGPTL2	cg09427311	1.24125	0.340974	3.64029	0.000469591	0.00819863	0.141361	0.210277	0.0689162	No	No	No
GPR143	cg11325578	0.960582	0.26426	3.63499	0.000478004	0.00832652	0.507653	0.70464	0.196987	No	No	No
PROK1	cg18434152	0.95587	0.262947	3.63522	0.000477644	0.00832652	0.490562	0.626309	0.135747	No	No	No
CPN1	cg15457079	1.50417	0.413939	3.63379	0.000479933	0.00835379	0.310023	0.411884	0.10186	No	No	No
SLC22A11	cg09705062	0.830829	0.228689	3.633	0.000481201	0.00836951	0.224336	0.39951	0.175174	No	No	No
UNC45B	cg13859324	1.28906	0.354927	3.63191	0.000482966	0.00839385	0.292244	0.401252	0.109008	No	No	No
COL5A1	cg26024843	0.71741	0.197581	3.63096	0.000484504	0.00841422	0.046259	0.241501	0.195242	No	No	No
UCK1	cg12894126	1.16846	0.3219	3.62988	0.000486255	0.0084255	0.0974922	0.171835	0.0743432	No	No	No
SLC35A2	cg23709838	0.957987	0.263905	3.63005	0.000485976	0.0084255	0.31589	0.488971	0.17308	No	No	No
HAPLN4	cg14449575	1.16095	0.319955	3.62848	0.000488541	0.00844598	0.438864	0.588743	0.149879	NA	NA	NA
HCN2	cg06005396	1.21782	0.335764	3.62701	0.000490934	0.00848097	0.0866992	0.19228	0.105581	No	No	No
GPD1	cg24210717	1.11334	0.306987	3.62666	0.000491517	0.00848466	0.216965	0.297241	0.0802754	No	No	No
NOL4	cg06722216	0.477423	0.131702	3.62503	0.000494199	0.00852455	0.0739703	0.36187	0.2879	Yes	Yes	Yes
STRA6	cg00075967	0.757802	0.209118	3.6238	0.000496235	0.00855012	0.218727	0.409057	0.19033	No	No	No
POU3F3	cg20291049	0.55725	0.153784	3.6236	0.000496572	0.00855012	0.212637	0.430662	0.218025	NA	NA	NA
UBE3B	cg07657776	1.29853	0.359004	3.61703	0.000507592	0.00871047	0.409224	0.543109	0.133884	No	No	No
CDKN2A	cg10895543	0.741852	0.205101	3.617	0.000507633	0.00871047	0.171935	0.458421	0.286486	NA	NA	NA
C5orf4	cg10257049	0.815555	0.225599	3.61506	0.000510932	0.00875677	0.102585	0.222728	0.120144	No	No	No
KCTD12	cg15901783	0.834603	0.230874	3.61497	0.000511095	0.00875677	0.192761	0.330307	0.137545	No	No	No
PHKG1	cg05724065	0.822692	0.227706	3.61296	0.000514519	0.0087892	0.0981787	0.217293	0.119114	No	No	No
UGT3A2	cg07084163	0.99082	0.274227	3.61314	0.000514218	0.0087892	0.135195	0.255581	0.120386	No	No	No
DES	cg18182399	0.640571	0.177289	3.61314	0.000514223	0.0087892	0.0601446	0.233177	0.173033	No	No	No
LGALS1	cg19853760	1.09313	0.302666	3.61167	0.00051675	0.00880766	0.141984	0.221889	0.0799054	No	No	No
PCK1	cg16101800	0.699905	0.193809	3.61131	0.000517357	0.00881146	0.190341	0.38015	0.189809	No	No	No
CPEB4	cg03032025	1.46716	0.406311	3.61093	0.000518017	0.00881615	0.307197	0.39391	0.0867133	No	No	No
GAL3ST3	cg21238818	0.626368	0.173537	3.60943	0.00052062	0.00885389	0.134258	0.434645	0.300386	NA	NA	NA
PCDHAC1	cg12629325	0.453746	0.125756	3.60814	0.000522866	0.00888552	0.222366	0.528894	0.306528	No	No	No
SOX3	cg24432916	0.622192	0.172595	3.60493	0.000528487	0.00895477	0.284987	0.498579	0.213593	Yes	Yes	No
ZNF471	cg14289985	0.813288	0.225661	3.60403	0.000530077	0.00896609	0.122007	0.219076	0.0970689	No	No	No
SYN2	cg15873301	0.566083	0.157076	3.60388	0.000530341	0.00896609	0.115514	0.299834	0.184321	No	No	No
RAB34	cg05668853	1.03855	0.288554	3.59916	0.000538739	0.00909468	0.212003	0.295901	0.0838977	No	No	No
FLJ31659	cg00393585	0.559907	0.155599	3.59839	0.000540109	0.00911031	0.202036	0.484685	0.282649	No	No	No
MOBKL2B	cg19180541	1.34285	0.373202	3.5982	0.000540459	0.00911031	0.413965	0.519023	0.105058	No	No	No
ZNF132	cg19776201	0.765855	0.21298	3.5959	0.000544613	0.00916687	0.0607587	0.289803	0.229044	No	No	No
TCN2	cg04081402	0.913624	0.254159	3.59469	0.000546803	0.009197	0.498812	0.637458	0.138645	No	No	No
RHOJ	cg18771300	0.712687	0.198292	3.59413	0.000547826	0.00920745	0.331138	0.475367	0.14423	No	No	No
GATA4	cg09626984	0.606428	0.168739	3.59389	0.000548256	0.00920794	0.266177	0.565076	0.298899	Yes	Yes	Yes
FLJ39237	cg19528976	0.600706	0.167187	3.59301	0.000549864	0.00922819	0.100775	0.339794	0.239019	NA	NA	NA
SPAG6	cg25802093	0.631967	0.175993	3.59087	0.000553793	0.00928056	0.324238	0.617172	0.292934	Yes	Yes	Yes
C4orf7	cg10585462	1.58796	0.442358	3.58977	0.00055582	0.0092998	0.34933	0.408003	0.0586731	No	No	No
MSN	cg16204757	1.43068	0.398565	3.58959	0.000556156	0.0092998	0.297946	0.4177	0.119754	No	No	No
GNAS	cg07284407	1.13589	0.316479	3.58913	0.000556996	0.00930153	0.57432	0.698669	0.124349	Yes	No	No
CHRFAM7A	cg07501965	1.06367	0.296362	3.58909	0.00055707	0.00930153	0.0918019	0.19205	0.100248	No	No	No
GRP	cg23357981	0.588818	0.164094	3.5883	0.000558531	0.00931915	0.0544794	0.265623	0.211144	No	No	No
WNT2	cg01830294	0.446909	0.124604	3.58662	0.000561661	0.00933744	0.102139	0.341218	0.239079	Yes	Yes	Yes
HTR1E	cg04278702	0.747776	0.20849	3.58662	0.000561657	0.00933744	0.0457629	0.12763	0.0818668	No	Yes	No
SUHW3	cg06899582	1.34384	0.374591	3.58749	0.000560044	0.00933744	0.318465	0.429711	0.111246	No	No	No
GGTLA1	cg18365380	1.25635	0.350258	3.58692	0.000561104	0.00933744	0.368326	0.491274	0.122948	No	No	No
SLC22A18	cg22858288	1.05117	0.293076	3.58668	0.000561542	0.00933744	0.628511	0.802705	0.174194	No	No	No
PGLYRP1	cg10862535	0.8945	0.249445	3.58596	0.000562895	0.00934442	0.336076	0.559815	0.223739	No	No	No
C19orf35	cg01129847	1.02678	0.286442	3.58458	0.000565483	0.00935358	0.401755	0.531884	0.130129	No	No	No
CDH7	cg04564030	0.748847	0.208881	3.58503	0.000564626	0.00935358	0.181928	0.396239	0.214311	Yes	Yes	Yes
C10orf26	cg15227982	0.740732	0.206644	3.58458	0.000565473	0.00935358	0.113631	0.254642	0.141011	No	No	No
MEST	cg13917504	1.36501	0.381018	3.58252	0.000569348	0.00941073	0.675457	0.767949	0.0924921	No	No	No
RGN	cg07654896	0.786162	0.219503	3.58156	0.000571177	0.00943416	0.529736	0.715244	0.185508	No	No	No
CLIPR-59	cg06432655	0.956083	0.26708	3.57977	0.00057458	0.00947042	0.476069	0.668619	0.19255	No	No	No
PCDHGB4	cg26282384	0.808263	0.225788	3.57975	0.00057461	0.00947042	0.228694	0.411139	0.182445	NA	NA	NA
KCNA3	cg00995520	0.81667	0.228229	3.57829	0.000577396	0.00950271	0.33461	0.492154	0.157544	Yes	Yes	Yes
PSD	cg23402444	1.14787	0.320774	3.57844	0.000577114	0.00950271	0.0708593	0.152705	0.0818458	No	No	No
ABHD9	cg05488632	0.580426	0.162243	3.57751	0.0005789	0.00951381	0.182042	0.405671	0.22363	No	Yes	No
TP73	cg04391111	0.440716	0.12326	3.57551	0.000582739	0.00956391	0.0787739	0.43996	0.361186	Yes	Yes	Yes
MAGEE2	cg05152459	1.10638	0.309434	3.57549	0.000582782	0.00956391	0.549288	0.699733	0.150445	No	No	No
SLC5A8	cg05063104	0.725072	0.202849	3.57444	0.000584814	0.00958602	0.348633	0.567141	0.218508	No	No	No
SLC8A2	cg22123464	0.895047	0.250423	3.57415	0.000585382	0.00958602	0.195742	0.33495	0.139208	NA	NA	NA
TMEFF2	cg18221862	0.560743	0.156902	3.57384	0.000585973	0.00958887	0.0952638	0.315154	0.219891	Yes	Yes	Yes
WDR13	cg25053301	1.33262	0.372994	3.57276	0.000588078	0.00960961	0.56409	0.635994	0.0719043	No	No	No
POU6F2	cg04748010	1.20829	0.33822	3.57249	0.000588604	0.00961138	0.30328	0.379519	0.0762388	No	No	No
SYDE1	cg00666746	1.42856	0.399995	3.57144	0.000590654	0.009638	0.0514544	0.115914	0.0644598	No	No	No
MASK	cg08680085	1.40071	0.392267	3.57081	0.000591888	0.00965127	0.450272	0.546305	0.0960329	No	No	No
TUBB6	cg07307078	0.543254	0.152179	3.56984	0.000593801	0.00967101	0.145601	0.374513	0.228912	No	No	No
PTPN5	cg17233601	0.718882	0.201381	3.56976	0.000593941	0.00967101	0.452671	0.680834	0.228163	No	No	No
SLC22A16	cg22334665	0.615251	0.172505	3.56657	0.000600262	0.00975318	0.0661139	0.242645	0.176531	No	No	No
MYR8	cg18946226	0.794152	0.222688	3.56622	0.000600955	0.00975753	0.306165	0.480605	0.174441	NA	NA	NA
GATA4	cg20279283	0.606447	0.17011	3.56503	0.000603315	0.00978201	0.332142	0.604929	0.272786	Yes	Yes	Yes
SLC9A3R2	cg10084993	1.54316	0.433114	3.56293	0.000607517	0.00983626	0.164518	0.223559	0.0590411	No	No	No
SH2D3C	cg24545967	1.00145	0.281231	3.56095	0.000611523	0.00986632	0.424885	0.599039	0.174155	No	No	No
VEGFB	cg25547939	1.56449	0.439391	3.56059	0.000612249	0.00987109	0.635837	0.749034	0.113198	No	No	No
SCDR10	cg25771201	0.873974	0.245537	3.55943	0.000614585	0.00989487	0.484821	0.638714	0.153894	No	No	No
PRELP	cg05955301	1.0303	0.289701	3.55643	0.000620718	0.0099866	0.208465	0.31178	0.103315	No	No	No
COX6A2	cg24110063	0.992409	0.279064	3.55621	0.000621172	0.00998691	0.322372	0.501359	0.178987	No	No	No
HOXC5	cg15700739	0.741398	0.208579	3.55452	0.000624652	0.0100358	0.171559	0.244331	0.0727718	Yes	Yes	Yes
GPRASP1	cg23571457	1.05631	0.297193	3.55429	0.000625119	0.0100363	0.197953	0.348695	0.150742	No	No	No
SCOTIN	cg14494596	3.92831	1.10547	3.55352	0.000626708	0.0100478	0.0806416	0.0994141	0.0187726	No	No	No
ANXA9	cg20437604	0.806604	0.227098	3.55179	0.000630306	0.0100914	0.202459	0.362528	0.160069	No	No	No
ATP6V1E2	cg27485921	1.136	0.319922	3.55087	0.000632224	0.010108	0.288077	0.452687	0.16461	No	No	No
ARL14	cg16334519	1.5597	0.439833	3.54612	0.000642199	0.0102588	0.470251	0.580679	0.110428	No	No	No
WDRPUH	cg25964007	0.534076	0.150616	3.54595	0.000642554	0.0102588	0.119452	0.401395	0.281943	No	No	No
CRISP2	cg04595372	1.00441	0.283307	3.54531	0.00064392	0.0102735	0.601852	0.749833	0.147982	No	No	No
FCGBP	cg24030627	1.42574	0.402232	3.54458	0.00064547	0.0102839	0.739036	0.844911	0.105876	No	No	No
FBXO39	cg20723355	0.450173	0.127019	3.54414	0.000646397	0.0102916	0.144634	0.395122	0.250488	Yes	Yes	No
DCC	cg21669679	1.16496	0.328792	3.54315	0.000648506	0.010318	0.260864	0.36902	0.108157	Yes	Yes	Yes
GNAS	cg21625881	1.6049	0.453262	3.54079	0.000653582	0.0103844	0.754904	0.852528	0.0976236	Yes	No	No
PCDHB5	cg03349953	1.33777	0.3779	3.54	0.000655274	0.0103975	0.28968	0.407023	0.117343	No	No	No
PRRT1	cg13035743	0.892344	0.252474	3.53441	0.000667458	0.0105683	0.359844	0.545752	0.185908	No	No	Yes
DACH2	cg15373633	0.627417	0.177638	3.532	0.000672769	0.010631	0.328008	0.559673	0.231665	Yes	Yes	Yes
SLC18A3	cg14008883	0.532996	0.150946	3.53105	0.000674875	0.010649	0.149922	0.371283	0.221361	Yes	Yes	No
NTSR1	cg03567830	0.675969	0.191479	3.53024	0.000676664	0.0106699	0.196128	0.379793	0.183665	No	No	No
ESR1	cg15626350	1.12663	0.319199	3.52955	0.0006782	0.0106868	0.194298	0.26539	0.0710925	No	No	Yes
TCEAL3	cg24648715	0.89627	0.254387	3.52325	0.000692378	0.0108649	0.340555	0.502037	0.161482	Yes	No	No
KLF8	cg06457357	0.752586	0.213698	3.52172	0.000695862	0.0109052	0.238889	0.39938	0.160492	No	No	No
C4orf8	cg20163033	1.0454	0.296973	3.5202	0.000699351	0.0109524	0.446686	0.594923	0.148237	NA	NA	NA
GPR6	cg26252167	0.606526	0.172341	3.51933	0.000701347	0.0109687	0.0526479	0.25856	0.205912	No	Yes	Yes
TGFB1I1	cg23910243	0.84792	0.241068	3.51735	0.000705928	0.0110328	0.33693	0.537273	0.200343	No	No	No
ARL10	cg08725962	0.579867	0.16494	3.51562	0.000709935	0.0110879	0.0306096	0.159923	0.129313	No	No	Yes
EIF5A2	cg10541755	0.479229	0.136457	3.51195	0.000718543	0.0111814	0.115999	0.320573	0.204574	No	No	No
SMPD3	cg10556064	0.662416	0.188607	3.51214	0.000718084	0.0111814	0.338236	0.552826	0.21459	No	No	Yes
CAP2	cg23013864	1.42793	0.406608	3.51182	0.000718846	0.0111814	0.240183	0.316801	0.0766184	No	No	No
PPAP2B	cg16505550	1.70534	0.485964	3.50918	0.000725087	0.0112632	0.302102	0.367137	0.0650346	No	No	No
HOXA5	cg02248486	0.73307	0.209044	3.50678	0.000730799	0.011329	0.254621	0.398542	0.143921	NA	NA	NA
CD99L2	cg25130333	1.22235	0.348612	3.50633	0.000731878	0.011338	0.438863	0.533018	0.0941543	No	No	No
NGFB	cg22572159	1.22655	0.349933	3.50509	0.000734848	0.0113764	0.118139	0.170736	0.0525967	Yes	No	Yes
HHIP	cg13749822	0.707179	0.201802	3.50433	0.000736699	0.0113897	0.100151	0.276638	0.176487	Yes	Yes	Yes
TLX2	cg00234616	0.760041	0.216924	3.50371	0.000738173	0.0114016	0.069923	0.242114	0.172191	Yes	Yes	Yes
GABRB1	cg12294121	0.754849	0.21545	3.50359	0.000738466	0.0114016	0.265603	0.486479	0.220876	No	No	No
CCND2	cg16994506	0.571071	0.163043	3.50259	0.000740906	0.0114239	0.0504751	0.238415	0.18794	No	No	No
TFAP2E	cg26372517	0.769507	0.219691	3.50268	0.000740676	0.0114239	0.169415	0.285208	0.115793	Yes	Yes	Yes
GNAS	cg21988465	1.21389	0.346612	3.50215	0.000741969	0.0114327	0.734728	0.827516	0.0927884	Yes	No	No
MYO1B	cg15096140	1.27851	0.365399	3.49896	0.00074975	0.0115371	0.172017	0.276043	0.104026	No	No	No
OTOF	cg26900154	0.880642	0.251726	3.49842	0.000751075	0.0115497	0.20992	0.321741	0.111821	No	No	No
KHDRBS2	cg18239753	0.480838	0.137532	3.49619	0.000756563	0.0116263	0.173001	0.376821	0.203821	No	No	No
CLDN9	cg10282491	0.93918	0.268856	3.49324	0.000763885	0.011731	0.169152	0.288943	0.119791	NA	NA	NA
GLOXD1	cg10164640	0.68221	0.195358	3.49211	0.000766717	0.0117666	0.0435288	0.164405	0.120876	No	No	No
INHBC	cg08640498	0.897746	0.257247	3.48982	0.000772465	0.0118367	0.164756	0.280938	0.116182	No	No	No
GALNT5	cg20469837	1.87655	0.537786	3.48941	0.00077351	0.0118392	0.114636	0.15532	0.0406848	No	No	No
EDIL3	cg16773899	0.484138	0.138754	3.48918	0.000774094	0.0118402	0.0734798	0.287656	0.214176	No	No	No
COL6A3	cg00573606	0.589349	0.168945	3.48841	0.000776025	0.0118619	0.191472	0.416408	0.224936	No	No	No
NFKBIB	cg27442349	0.821294	0.235837	3.48246	0.000791239	0.0120778	0.477307	0.654126	0.176819	No	No	No
PYCARD	cg12100791	0.728305	0.209207	3.48127	0.00079431	0.0121091	0.33398	0.524379	0.190399	Yes	No	No
UBE1	cg25059428	1.34825	0.387679	3.47776	0.000803445	0.0122321	0.110213	0.217495	0.107283	No	No	No
FLJ39827	cg19407266	1.18046	0.339518	3.47686	0.000805796	0.0122598	0.39703	0.506539	0.10951	No	No	No
MEG3	cg05711886	1.25144	0.360011	3.47613	0.000807722	0.012281	0.621992	0.747402	0.12541	NA	NA	NA
DCTN1	cg01753375	0.662239	0.190545	3.47551	0.000809367	0.0122978	0.319473	0.545955	0.226482	No	No	No
MMP3	cg16466334	1.38814	0.399585	3.47396	0.000813454	0.012345	0.451057	0.551654	0.100597	No	No	No
C20orf100	cg11319389	0.604847	0.174129	3.47356	0.000814503	0.0123513	0.12986	0.346632	0.216771	Yes	No	No
IL22RA1	cg25946374	0.915244	0.263509	3.47329	0.000815213	0.0123539	0.245486	0.348152	0.102665	No	No	No
ZNF663	cg00576250	0.724589	0.208632	3.47305	0.000815872	0.0123558	0.0862312	0.265788	0.179557	NA	NA	NA
C2orf10	cg13121699	0.876225	0.252346	3.47231	0.000817822	0.0123772	0.0988862	0.187467	0.0885811	NA	NA	NA
C1orf52	cg05654164	0.863436	0.248698	3.47183	0.000819113	0.0123845	0.126907	0.230543	0.103636	No	No	No
NDRG2	cg18081258	0.684836	0.197273	3.47152	0.000819925	0.0123845	0.179063	0.378379	0.199316	No	No	No
BM88	cg23587532	1.13215	0.326106	3.47171	0.000819431	0.0123845	0.540797	0.689031	0.148235	No	No	No
SLC5A8	cg05722918	0.642176	0.185093	3.46947	0.000825413	0.012451	0.0532405	0.278149	0.224908	No	No	No
GATA4	cg11981599	0.66142	0.190691	3.46855	0.000827899	0.0124803	0.286374	0.481337	0.194963	Yes	Yes	Yes
C1QTNF6	cg26143719	0.842871	0.243114	3.46699	0.000832114	0.0125356	0.238957	0.347654	0.108697	No	No	No
KALRN	cg10430690	1.00665	0.29062	3.4638	0.00084077	0.0126577	0.417155	0.576236	0.159081	No	No	No
PABPC3	cg16991589	1.12971	0.326206	3.4632	0.000842425	0.0126743	0.450058	0.594998	0.14494	No	No	No
KCNE3	cg23189044	0.595165	0.172122	3.45781	0.000857282	0.0128641	0.0830291	0.261105	0.178076	No	No	No
WBSCR14	cg07737781	3.69842	1.06986	3.4569	0.000859815	0.0128853	0.0509619	0.081329	0.0303671	No	No	Yes
LDOC1	cg14562990	1.00469	0.29062	3.45706	0.000859374	0.0128853	0.439288	0.51334	0.0740513	No	No	No
CDKN2A	cg12840719	1.1041	0.319491	3.45582	0.000862847	0.0129223	0.264599	0.414353	0.149754	NA	NA	NA
MYO1F	cg16504798	1.08702	0.314623	3.45499	0.00086517	0.0129486	0.138957	0.221331	0.0823744	No	No	No
IZUMO1	cg08536841	0.677615	0.196204	3.45362	0.000869019	0.0129893	0.149635	0.32083	0.171194	No	No	No
OSTbeta	cg16029760	0.627183	0.181703	3.45169	0.000874484	0.013054	0.143501	0.348135	0.204634	NA	NA	NA
DRD1	cg16112129	0.579476	0.167961	3.45006	0.000879108	0.0131145	0.121721	0.306005	0.184284	NA	NA	NA
ZNF502	cg21672276	0.66777	0.193612	3.44901	0.000882105	0.0131496	0.134983	0.357324	0.22234	No	No	No
MSX2	cg27096144	1.78108	0.51643	3.44883	0.000882609	0.0131496	0.0566519	0.118911	0.0622594	No	Yes	Yes
FMNL1	cg00853068	1.1347	0.329147	3.4474	0.000886698	0.013202	0.191347	0.288344	0.0969971	No	No	No
DPM2	cg23006204	0.749597	0.217467	3.44695	0.000887994	0.0132041	0.260976	0.442972	0.181996	No	No	No
C18orf34	cg18382305	1.17786	0.341788	3.44616	0.000890283	0.0132296	0.389251	0.494079	0.104828	No	No	No
PHYHIP	cg26104206	0.985217	0.285976	3.4451	0.000893346	0.0132665	0.116614	0.220079	0.103466	No	No	No
PLAT	cg12091331	0.94643	0.274891	3.44293	0.000899645	0.0133428	0.190289	0.321047	0.130758	No	No	No
ALOX15	cg15843823	0.600901	0.174593	3.44173	0.00090314	0.0133774	0.0856466	0.293572	0.207925	Yes	Yes	Yes
SHANK2	cg10362475	0.761961	0.221415	3.44133	0.00090432	0.0133862	0.439827	0.689047	0.249219	No	No	No
DLEU1	cg05701114	2.93308	0.852529	3.44045	0.000906889	0.013407	0.0641495	0.0955371	0.0313876	No	No	No
FHL2	cg10635061	0.702343	0.20427	3.43831	0.000913185	0.0134827	0.271873	0.507208	0.235335	No	No	No
NINJ2	cg00237010	0.829988	0.241491	3.43693	0.000917261	0.0135168	0.279595	0.416971	0.137376	No	No	No
PHKG1	cg19759064	0.930312	0.270676	3.437	0.000917065	0.0135168	0.0814882	0.185476	0.103988	No	No	No
GFRA1	cg23898073	0.463174	0.13475	3.43729	0.000916195	0.0135168	0.0527021	0.3455	0.292798	Yes	Yes	No
PLS3	cg08990057	0.966228	0.281164	3.43653	0.000918464	0.0135182	0.172161	0.341965	0.169805	Yes	No	No
MRVI1	cg24365867	0.667055	0.194109	3.4365	0.000918538	0.0135182	0.232892	0.420757	0.187865	No	No	No
TCTEX1D1	cg24110050	0.828415	0.241677	3.42777	0.000944808	0.0138716	0.293154	0.521247	0.228093	No	No	No
HSD17B13	cg08815403	0.98339	0.28705	3.42585	0.000950685	0.0139288	0.273722	0.44173	0.168008	No	No	No
P2RY6	cg06637774	0.672537	0.196364	3.42495	0.000953459	0.0139506	0.126146	0.257169	0.131023	No	No	No
SLC22A11	cg09326702	0.865783	0.25288	3.42369	0.000957319	0.0139903	0.535857	0.69935	0.163493	No	No	No
RNF36	cg05439368	1.24549	0.363865	3.42295	0.000959619	0.0140061	0.379559	0.52645	0.146891	No	No	No
MAP2K2	cg24748945	2.28186	0.666627	3.42299	0.000959489	0.0140061	0.110254	0.176574	0.0663201	No	No	No
PROK1	cg21324308	1.14369	0.334236	3.42182	0.000963126	0.0140305	0.454965	0.571863	0.116897	No	No	No
NCOR2	cg22580512	0.926319	0.270705	3.42187	0.000962954	0.0140305	0.22566	0.315151	0.089491	No	No	No
PLAC2	cg16483916	1.19082	0.348038	3.42152	0.000964059	0.0140352	0.0502716	0.134057	0.0837854	No	No	No
ERBB2	cg11993754	1.55342	0.454062	3.42117	0.000965128	0.0140419	0.0621059	0.13186	0.0697542	No	No	No
GALR1	cg26721264	0.482713	0.141158	3.41967	0.000969809	0.0141011	0.0945206	0.367096	0.272575	NA	NA	NA
SPATA12	cg13745870	1.71882	0.503245	3.41548	0.000982995	0.0142477	0.222236	0.271901	0.049665	No	No	No
CYP2W1	cg15914863	0.751522	0.22003	3.41553	0.000982824	0.0142477	0.569581	0.725952	0.156372	No	No	No
HEXIM1	cg04700814	1.04275	0.305428	3.41406	0.000987507	0.014295	0.240147	0.355805	0.115658	No	No	No
PIR	cg19144013	0.752695	0.220553	3.41276	0.000991642	0.0143458	0.174891	0.375931	0.20104	Yes	Yes	Yes
FLJ40365	cg09601629	0.542215	0.158997	3.41022	0.000999786	0.0144545	0.127346	0.338522	0.211176	No	No	No
ZNF660	cg22598028	0.460356	0.135015	3.40967	0.00100156	0.014471	0.0759406	0.29313	0.217189	No	No	No
P4HA2	cg24117468	1.09064	0.320102	3.40716	0.00100967	0.01457	0.142495	0.234322	0.0918268	No	No	No
RAMP3	cg02417264	0.577676	0.169578	3.40656	0.00101163	0.0145712	0.273752	0.41868	0.144928	No	No	No
IFITM3	cg14885742	1.0834	0.318034	3.40655	0.00101167	0.0145712	0.189276	0.266003	0.0767271	No	No	No
MTCP1	cg24341236	1.14117	0.334965	3.40683	0.00101072	0.0145712	0.435552	0.549163	0.11361	No	No	No
MAN2C1	cg04008455	1.92607	0.565643	3.4051	0.00101637	0.0146206	0.152741	0.18479	0.0320496	No	No	No
LOC284837	cg00546897	0.92281	0.271157	3.40323	0.00102251	0.0146906	0.265651	0.33323	0.0675793	No	No	No
CXCL6	cg25432696	1.07741	0.316577	3.40329	0.0010223	0.0146906	0.122596	0.221912	0.0993157	NA	NA	NA
GALR2	cg14165663	0.639172	0.18793	3.40112	0.00102945	0.0147644	0.276896	0.50477	0.227873	Yes	Yes	Yes
FLJ39155	cg23029193	0.721471	0.21213	3.40108	0.00102958	0.0147644	0.0711197	0.2434	0.172281	Yes	No	Yes
TMEM119	cg22836470	0.903833	0.265823	3.40013	0.00103275	0.0147821	0.339791	0.480303	0.140512	No	No	No
BHMT2	cg03400060	0.559611	0.164638	3.39904	0.00103637	0.0148247	0.323127	0.56239	0.239263	No	No	No
GNAS	cg01355739	1.86746	0.54967	3.39743	0.00104173	0.0148829	0.728456	0.807492	0.0790356	Yes	No	No
MGC16291	cg21096915	0.681658	0.200633	3.39754	0.00104135	0.0148829	0.241376	0.455986	0.21461	No	No	No
ARF5	cg15802323	2.82766	0.832928	3.39484	0.0010504	0.0149602	0.0743453	0.105624	0.0312784	No	No	No
HOXC13	cg20587394	0.762519	0.224601	3.395	0.00104989	0.0149602	0.138469	0.313883	0.175414	Yes	Yes	No
EVX1	cg27626299	0.709401	0.208945	3.39515	0.00104937	0.0149602	0.174167	0.411805	0.237638	No	Yes	Yes
TMEM101	cg12259256	0.638731	0.188224	3.39346	0.00105506	0.0150141	0.171795	0.396929	0.225135	No	No	No
KCNQ1DN	cg13081704	0.525465	0.154861	3.39314	0.00105615	0.0150141	0.347945	0.578885	0.23094	No	No	No
COL6A2	cg21513553	0.452348	0.133378	3.39147	0.00106184	0.0150764	0.068973	0.346575	0.277602	No	No	No
SYT9	cg08185661	0.366897	0.108206	3.39073	0.00106435	0.0150881	0.0839282	0.414131	0.330203	No	No	No
CHAT	cg12052765	0.756913	0.223237	3.39063	0.0010647	0.0150881	0.132288	0.324815	0.192528	No	No	No
MLLT7	cg09176853	1.0248	0.302299	3.39003	0.00106674	0.0150993	0.253322	0.390118	0.136797	Yes	No	No
HPD	cg02506908	0.849425	0.250633	3.38911	0.00106987	0.0151343	0.33892	0.483317	0.144396	No	No	No
ASB10	cg13289321	0.843284	0.248943	3.38746	0.00107557	0.015195	0.548781	0.679646	0.130865	No	No	No
NEFH	cg16042149	0.597589	0.176537	3.38506	0.00108385	0.0152849	0.113907	0.317914	0.204007	Yes	No	Yes
WWC3	cg12064213	1.10267	0.325785	3.38467	0.00108521	0.0152947	0.369347	0.501655	0.132308	No	No	No
HAND2	cg02774439	0.602138	0.177926	3.38419	0.00108687	0.0153087	0.142241	0.384988	0.242747	Yes	Yes	Yes
IFI35	cg08090640	1.1764	0.347772	3.38268	0.00109216	0.0153643	0.201394	0.261681	0.0602869	NA	NA	NA
FLJ13946	cg26147657	0.798287	0.235982	3.38282	0.00109164	0.0153643	0.0797433	0.144713	0.0649698	No	No	No
MYBPH	cg23609672	1.12405	0.332671	3.37887	0.00110555	0.0155242	0.637372	0.754752	0.11738	No	No	No
CNTNAP3	cg13059782	1.8254	0.540369	3.37807	0.00110837	0.0155542	0.0782795	0.133576	0.0552961	No	No	No
PIB5PA	cg18053607	1.15279	0.341355	3.37709	0.00111185	0.0155936	0.130045	0.214034	0.0839893	No	No	No
A2BP1	cg03586879	0.685396	0.203096	3.37473	0.00112027	0.0156829	0.0596881	0.306121	0.246432	No	No	No
TMEM41A	cg11285843	1.80933	0.53612	3.37486	0.00111982	0.0156829	0.147934	0.188122	0.0401876	No	No	No
PIB5PA	cg27324619	0.897805	0.266065	3.37438	0.00112151	0.0156907	0.164301	0.259444	0.0951435	No	No	No
EML4	cg01184449	0.938662	0.27838	3.37188	0.00113053	0.0158073	0.492044	0.615648	0.123604	No	No	No
SLMAP	cg00002426	0.8064	0.239181	3.3715	0.00113189	0.0158166	0.208602	0.284272	0.0756699	NA	NA	NA
NMUR1	cg18250832	1.1529	0.342334	3.36775	0.00114551	0.0159778	0.526533	0.593889	0.0673551	No	No	No
PNMA2	cg02154186	0.581386	0.172748	3.36553	0.00115369	0.0160528	0.0959295	0.32104	0.225111	NA	NA	NA
GPR101	cg11033833	0.886523	0.263412	3.36554	0.00115365	0.0160528	0.293503	0.409539	0.116035	Yes	Yes	Yes
SLC27A3	cg21279955	2.42158	0.719598	3.36518	0.00115496	0.0160608	0.0748935	0.104109	0.0292157	No	No	No
ANK2	cg02735486	0.914633	0.271901	3.36385	0.00115987	0.0161093	0.146763	0.206236	0.0594729	No	No	No
CBLN2	cg21902544	0.516065	0.15341	3.36397	0.00115942	0.0161093	0.0940338	0.308157	0.214123	No	No	No
TSSK2	cg25759381	1.4106	0.419364	3.36366	0.00116055	0.0161093	0.712329	0.802703	0.0903737	No	No	No
CHST3	cg04268405	0.834463	0.24813	3.36301	0.00116298	0.0161333	0.414472	0.627657	0.213185	No	No	No
FLJ90036	cg12717203	0.517392	0.153917	3.3615	0.0011686	0.0161722	0.133257	0.385172	0.251915	NA	NA	NA
ACTA2	cg07436807	0.793226	0.236072	3.3601	0.0011738	0.0162305	0.409094	0.592516	0.183423	No	No	No
C7orf13	cg07671603	0.430716	0.12819	3.35999	0.00117424	0.0162305	0.0940301	0.28946	0.19543	No	No	No
FOXD4L4	cg07485588	0.995545	0.296339	3.35948	0.00117614	0.0162471	0.438389	0.612233	0.173844	Yes	Yes	Yes
PNPLA2	cg22016649	2.04575	0.609035	3.359	0.00117794	0.0162524	0.0733942	0.113512	0.0401178	NA	NA	NA
GSCL	cg26599006	0.453114	0.134905	3.35877	0.0011788	0.0162545	0.0707671	0.31471	0.243942	Yes	Yes	Yes
P2RX7	cg23801057	0.859361	0.255888	3.35835	0.00118039	0.0162667	0.252441	0.397806	0.145365	No	No	No
C6orf145	cg24549507	0.901985	0.268667	3.35726	0.00118447	0.0163131	0.0553369	0.208832	0.153495	No	No	No
ZNF667	cg03289872	0.588896	0.175498	3.35557	0.00119086	0.0163717	0.066394	0.231613	0.165219	No	No	No
PRLR	cg17397493	1.55561	0.463584	3.35562	0.00119068	0.0163717	0.260698	0.316611	0.0559128	No	No	No
IARS2	cg13530946	1.30571	0.389228	3.35462	0.0011945	0.0164118	0.381309	0.494346	0.113036	No	No	No
KCNA3	cg03483626	0.860382	0.256769	3.3508	0.00120909	0.0165665	0.277538	0.41314	0.135601	Yes	Yes	Yes
PDE4DIP	cg21047206	1.32236	0.394648	3.35073	0.00120937	0.0165665	0.613006	0.663983	0.0509769	Yes	Yes	Yes
VDAC3	cg17910564	1.04401	0.311622	3.35023	0.00121128	0.0165776	0.335282	0.488322	0.15304	No	No	No
CD59	cg24453664	1.18916	0.354964	3.35008	0.00121185	0.0165776	0.114764	0.182541	0.0677769	No	No	No
SERPINF2	cg04780454	1.14584	0.342246	3.34801	0.00121986	0.0166421	0.247639	0.377586	0.129947	No	No	No
NDUFS2	cg17166812	1.04909	0.313314	3.34836	0.00121851	0.0166421	0.151893	0.314171	0.162278	No	No	No
HOXA9	cg01354473	0.561038	0.167614	3.34721	0.00122297	0.0166634	0.284159	0.56018	0.276021	No	Yes	Yes
TRIM58	cg07533148	0.454833	0.135912	3.34653	0.00122561	0.0166796	0.266649	0.49341	0.226761	No	No	No
CAPN12	cg24712395	1.2489	0.373191	3.34655	0.00122556	0.0166796	0.67418	0.790853	0.116673	No	No	No
ST6GAL2	cg25725843	0.867341	0.259438	3.34315	0.00123884	0.0168397	0.0963301	0.220453	0.124123	No	No	No
PAQR6	cg10046892	0.70362	0.210597	3.34107	0.00124706	0.0168815	0.142745	0.256757	0.114012	No	No	No
SLC22A7	cg24922992	1.08004	0.323188	3.34185	0.00124399	0.0168815	0.265681	0.356038	0.090357	No	No	No
NAV1	cg25167447	1.16499	0.348677	3.34118	0.00124665	0.0168815	0.30997	0.396102	0.0861324	No	No	No
SORBS2	cg26583078	1.04076	0.311495	3.34119	0.00124658	0.0168815	0.388391	0.492803	0.104412	No	No	No
PDE4B	cg26832142	0.570044	0.170561	3.34217	0.00124272	0.0168815	0.0580278	0.233023	0.174995	NA	NA	NA
PKDREJ	cg11377136	0.541659	0.162347	3.33643	0.00126557	0.0171118	0.190306	0.413173	0.222867	No	No	No
SFRP4	cg20019546	0.948529	0.284422	3.33494	0.00127158	0.0171728	0.0720844	0.16324	0.0911558	No	Yes	Yes
COX4I2	cg27413508	0.650456	0.195095	3.33405	0.00127516	0.0172111	0.267104	0.48697	0.219865	No	No	No
VNN2	cg17836145	1.00889	0.30271	3.33286	0.00127998	0.0172357	0.338089	0.475575	0.137486	No	No	No
HOXD8	cg21815667	0.815206	0.244576	3.33315	0.00127882	0.0172357	0.0814168	0.228147	0.14673	Yes	Yes	Yes
LASS3	cg25004981	4.52883	1.35871	3.33319	0.00127865	0.0172357	0.913843	0.943365	0.0295222	No	No	No
FLJ30934	cg19018097	0.527493	0.158531	3.32738	0.00130239	0.0174861	0.0369528	0.219304	0.182351	No	No	No
ADMR	cg19824441	1.04236	0.313312	3.32691	0.00130432	0.0175017	0.588138	0.72882	0.140682	No	No	No
FSCN1	cg25176823	1.28899	0.387495	3.32647	0.00130615	0.017516	0.100579	0.219333	0.118754	No	No	No
SLITRK1	cg07104706	0.72749	0.218769	3.32538	0.00131065	0.017556	0.274958	0.473762	0.198804	Yes	Yes	Yes
PLEKHA4	cg06339706	0.797359	0.23995	3.32302	0.00132049	0.0176671	0.291159	0.40167	0.11051	No	No	No
LCN12	cg13493001	0.751626	0.226295	3.32144	0.00132711	0.0177293	0.467212	0.59424	0.127028	No	No	No
GATA4	cg25216696	0.500761	0.15077	3.32136	0.00132745	0.0177293	0.243972	0.576162	0.33219	Yes	Yes	Yes
BPHL	cg14115346	1.6089	0.484581	3.3202	0.00133234	0.0177739	0.258357	0.283219	0.0248614	No	No	No
DLK1	cg09971646	0.839892	0.253036	3.31926	0.00133631	0.0177958	0.338873	0.486895	0.148021	No	Yes	Yes
XPNPEP2	cg23026995	1.03338	0.311325	3.31929	0.00133618	0.0177958	0.267393	0.38962	0.122227	No	No	No
P2RX5	cg13246592	1.62663	0.490238	3.31804	0.00134146	0.0178128	0.193142	0.245092	0.0519501	No	Yes	Yes
SLC34A3	cg21964481	1.64389	0.495426	3.31813	0.00134109	0.0178128	0.767374	0.837089	0.0697148	No	No	No
TMEM88	cg23671708	1.1244	0.33883	3.31849	0.00133954	0.0178128	0.602855	0.738004	0.135149	Yes	Yes	Yes
ERBB3	cg19258882	1.02057	0.307834	3.31533	0.00135299	0.0179451	0.124078	0.18411	0.0600325	No	No	No
NHLH1	cg08247612	1.05595	0.31855	3.31487	0.00135496	0.0179608	0.651593	0.764732	0.113139	No	No	No
ID4	cg17252960	2.73773	0.826035	3.3143	0.0013574	0.0179828	0.0643312	0.0990581	0.0347269	No	No	No
FLJ22746	cg26154999	0.783943	0.23658	3.31365	0.00136022	0.0179993	0.484446	0.675832	0.191387	No	No	No
MEGF10	cg06940792	0.581807	0.175656	3.31219	0.00136649	0.0180719	0.0868276	0.328275	0.241447	No	No	No
STEAP1	cg18320336	0.875802	0.264556	3.31046	0.00137396	0.018157	0.0882574	0.185975	0.0977178	No	No	No
NRG1	cg19162158	0.416022	0.125673	3.31034	0.00137451	0.018157	0.0296841	0.321902	0.292218	Yes	Yes	Yes
HKR1	cg12024906	0.46862	0.141585	3.30982	0.00137673	0.018176	0.101884	0.367849	0.265965	No	No	No
SLC22A14	cg16558203	1.02293	0.309115	3.30923	0.0013793	0.0181768	0.379786	0.532164	0.152377	No	No	No
HCN4	cg24396745	0.914491	0.276361	3.30905	0.00138012	0.0181768	0.059109	0.16996	0.110851	Yes	No	Yes
VAMP5	cg25651505	0.984486	0.297515	3.30903	0.00138018	0.0181768	0.410103	0.586372	0.176269	No	No	No
C11orf2	cg13853761	1.3836	0.418481	3.30625	0.00139236	0.0182953	0.732816	0.839701	0.106885	No	No	No
TESSP1	cg19403023	1.08937	0.329574	3.30538	0.00139618	0.0183273	0.517002	0.619021	0.102019	No	No	No
SMPD3	cg00891541	0.610531	0.184772	3.30425	0.00140116	0.0183613	0.322763	0.538111	0.215348	No	No	Yes
LOC220070	cg02046017	0.949114	0.287239	3.30426	0.00140111	0.0183613	0.338558	0.484124	0.145567	No	No	No
CDKN2A	cg11653709	1.34593	0.407306	3.30447	0.00140019	0.0183613	0.301367	0.422893	0.121526	NA	NA	NA
SEMA3B	cg02657721	1.99115	0.602639	3.30405	0.00140204	0.0183623	0.144543	0.181109	0.0365667	No	No	Yes
WDR8	cg19135761	1.01302	0.306631	3.30372	0.00140351	0.0183711	0.26402	0.398923	0.134903	Yes	Yes	Yes
HOXA5	cg12128839	0.984107	0.29794	3.30304	0.00140652	0.0183894	0.143637	0.242986	0.0993489	NA	NA	NA
TNFRSF11B	cg19620294	1.44397	0.437205	3.30273	0.00140787	0.0183967	0.201744	0.244001	0.042257	No	No	No
KDR	cg17286640	1.05841	0.320693	3.30037	0.0014184	0.0185131	0.125267	0.233398	0.108132	No	No	No
RIG	cg05181279	1.07891	0.326942	3.3	0.00142004	0.018524	0.464392	0.602139	0.137746	No	No	No
FLJ90575	cg09424308	1.15964	0.35148	3.29931	0.00142312	0.0185536	0.105845	0.200429	0.094584	No	No	Yes
C9orf125	cg06912252	0.522988	0.158579	3.29797	0.00142916	0.0186219	0.11295	0.40871	0.295759	No	No	No
ZNF667	cg05508084	0.847532	0.257043	3.29724	0.00143244	0.0186445	0.128566	0.249424	0.120859	No	No	No
NEUROD1	cg22359606	0.581121	0.176347	3.29533	0.0014411	0.0187455	0.143565	0.370775	0.22721	Yes	Yes	Yes
ARTN	cg06207804	1.97001	0.598001	3.29433	0.00144562	0.0187936	0.0977934	0.14126	0.0434664	No	No	No
HS3ST2	cg20023231	0.729113	0.221431	3.29273	0.00145291	0.018867	0.123749	0.327284	0.203535	Yes	No	Yes
MTMR11	cg24620905	1.13929	0.346054	3.29224	0.00145517	0.018875	0.147911	0.207568	0.0596564	No	No	No
CX3CL1	cg15195412	1.59132	0.483648	3.29026	0.00146427	0.0189638	0.111348	0.168079	0.0567317	No	No	No
CDC42BPA	cg24860534	1.2047	0.366147	3.29021	0.00146449	0.0189638	0.0906999	0.158231	0.067531	No	No	No
LECT2	cg21783004	1.36078	0.413714	3.28919	0.00146919	0.0190033	0.335137	0.414918	0.0797814	No	No	No
C10orf33	cg03852570	1.77288	0.539375	3.28691	0.00147976	0.0191184	0.0683709	0.124544	0.0561734	No	No	No
MGC21830	cg01966105	1.73315	0.527507	3.28556	0.00148605	0.0191781	0.655396	0.725611	0.0702153	NA	NA	NA
CHFR	cg04044684	0.628468	0.191315	3.28499	0.0014887	0.0192014	0.0668871	0.196105	0.129218	No	No	No
ACTL6B	cg08572611	0.470932	0.143437	3.28319	0.00149714	0.0192995	0.181757	0.398688	0.216932	No	No	Yes
KCNAB3	cg14918082	0.684323	0.20854	3.2815	0.00150513	0.0193698	0.539125	0.773333	0.234209	No	No	No
SLC44A2	cg17826679	0.672249	0.20486	3.2815	0.0015051	0.0193698	0.266426	0.395053	0.128627	No	No	No
NOVA1	cg18488855	0.611468	0.186524	3.27824	0.0015206	0.019558	0.163831	0.334129	0.170298	No	No	No
FNDC5	cg20951444	1.2639	0.385602	3.27774	0.00152298	0.0195777	0.266957	0.373749	0.106793	No	No	Yes
FLJ14834	cg11126134	0.410728	0.125319	3.27746	0.00152429	0.0195836	0.145225	0.384026	0.2388	No	No	No
C2orf21	cg14419187	0.601381	0.183783	3.27223	0.00154951	0.0198853	0.227417	0.384915	0.157497	No	No	No
DOCK2	cg21233722	0.632976	0.193429	3.2724	0.00154867	0.0198853	0.427595	0.633238	0.205643	No	No	No
CPT1B	cg00983520	0.791829	0.242009	3.27189	0.00155115	0.0198916	0.235863	0.440512	0.204648	No	No	No
FSD1	cg25902889	0.824897	0.252126	3.27177	0.00155174	0.0198916	0.478162	0.638883	0.160721	No	No	No
NSMCE1	cg12391783	1.5381	0.470162	3.27143	0.00155338	0.0199015	0.581259	0.699056	0.117798	No	No	No
DAB1	cg06710648	0.706181	0.215922	3.27055	0.0015577	0.0199439	0.246622	0.431283	0.184661	No	No	No
DNAJC11	cg20668607	1.09555	0.334989	3.2704	0.00155842	0.0199439	0.439763	0.518202	0.078439	No	No	No
VILL	cg26113512	0.436774	0.13357	3.27	0.00156036	0.0199576	0.0295641	0.300131	0.270566	No	No	No
HIST1H3A	cg08797106	1.06005	0.324261	3.26913	0.00156465	0.0200012	0.122631	0.233078	0.110448	No	Yes	No
NR5A1	cg00691625	1.43361	0.438583	3.26872	0.00156663	0.0200043	0.764873	0.858434	0.0935614	No	No	No
PPP2R4	cg04653308	0.998585	0.30549	3.2688	0.00156626	0.0200043	0.415835	0.552347	0.136512	No	No	No
MPST	cg08727202	0.814869	0.249317	3.2684	0.00156818	0.020013	0.209778	0.305386	0.0956073	No	No	No
H1F0	cg07141002	0.738403	0.226169	3.26483	0.00158584	0.0202271	0.24207	0.331369	0.089299	No	Yes	No
CXCL1	cg25806808	0.557689	0.170846	3.26427	0.0015886	0.0202332	0.0952624	0.28318	0.187918	Yes	No	No
AOC2	cg18043280	2.61031	0.799818	3.26363	0.00159179	0.0202465	0.858508	0.899978	0.0414699	No	No	No
ZIM2	cg27519373	1.06432	0.326112	3.26366	0.00159163	0.0202465	0.526362	0.616772	0.0904103	No	No	No
KREMEN1	cg03198372	1.54317	0.473059	3.2621	0.00159942	0.0203101	0.0735768	0.15698	0.0834035	No	No	No
SGCD	cg04435420	0.771481	0.236747	3.25867	0.00161667	0.0205064	0.0474573	0.17178	0.124323	No	No	No
ZNF577	cg16731240	0.569456	0.174829	3.25722	0.00162399	0.0205766	0.222411	0.353348	0.130937	No	No	No
DKFZp434I1020	cg17886204	0.423129	0.130017	3.2544	0.00163835	0.0207356	0.0991877	0.385946	0.286758	Yes	No	No
NALP6	cg08961832	0.620015	0.190622	3.25259	0.00164766	0.020819	0.154626	0.339109	0.184482	No	No	No
NDN	cg12532169	0.832151	0.255823	3.25284	0.00164639	0.020819	0.500569	0.658766	0.158196	No	No	No
GDI1	cg16227684	1.17194	0.360336	3.25235	0.00164887	0.0208228	0.384819	0.492717	0.107897	NA	NA	NA
XKR6	cg10947146	0.454379	0.139782	3.25062	0.00165779	0.0209173	0.06989	0.395232	0.325342	No	No	No
FRMD4A	cg05755354	0.703414	0.216423	3.25018	0.00166009	0.02093	0.35937	0.570347	0.210978	NA	NA	NA
JAM2	cg11344614	1.35019	0.415584	3.24891	0.00166669	0.020972	0.490418	0.585175	0.0947572	No	No	No
APOBEC2	cg22375610	0.904315	0.278351	3.24883	0.00166707	0.020972	0.369847	0.526183	0.156336	No	No	No
CLDN11	cg20449692	0.445228	0.137121	3.24697	0.00167678	0.0210709	0.0572251	0.409146	0.351921	No	No	No
SYCE1	cg17606194	0.750551	0.231208	3.24621	0.00168077	0.0211096	0.365097	0.530317	0.16522	No	No	No
PDE4C	cg13899108	1.0659	0.328852	3.24129	0.00170675	0.021389	0.448519	0.606905	0.158387	NA	NA	NA
ARC	cg24981018	1.03993	0.320868	3.24098	0.00170839	0.021398	0.367353	0.409926	0.0425732	No	No	No
COL6A3	cg08950375	1.62203	0.500608	3.24012	0.00171296	0.0214435	0.416931	0.479328	0.0623974	No	No	No
CSMD2	cg19228118	0.81577	0.251817	3.23953	0.00171611	0.0214595	0.155582	0.286521	0.130939	No	No	Yes
FGF11	cg13492227	0.893349	0.275799	3.23913	0.00171825	0.0214746	0.455087	0.607923	0.152836	No	No	Yes
EN1	cg03266453	1.22914	0.379596	3.23802	0.00172418	0.0215136	0.204009	0.302114	0.0981051	Yes	Yes	Yes
IGFBP5	cg19008649	2.41197	0.74482	3.23832	0.00172258	0.0215136	0.122376	0.144232	0.0218566	Yes	No	No
RBAK	cg06914598	1.10268	0.340788	3.23567	0.00173687	0.021637	0.312156	0.4737	0.161544	No	No	No
RPE	cg19203504	2.37001	0.732454	3.23571	0.00173666	0.021637	0.105979	0.13378	0.0278014	No	No	No
GNAS	cg15160445	0.980371	0.303075	3.23474	0.00174186	0.0216752	0.50156	0.636197	0.134637	Yes	No	No
CXCL3	cg08003742	0.855356	0.264488	3.23401	0.00174584	0.0217128	0.113007	0.197726	0.0847187	No	No	No
AMOT	cg18389752	0.921876	0.285072	3.23384	0.00174677	0.0217128	0.16733	0.308013	0.140684	Yes	Yes	No
KCNA4	cg15183083	0.566217	0.175208	3.23168	0.00175854	0.0218473	0.114641	0.32867	0.214029	NA	NA	NA
HIST1H3C	cg07636178	0.566338	0.175391	3.229	0.00177322	0.0220026	0.127638	0.350064	0.222426	No	Yes	No
LRRN3	cg09837977	0.868731	0.269077	3.22856	0.00177567	0.0220062	0.380427	0.531623	0.151196	No	No	No
LSAMP	cg25315362	0.829468	0.256942	3.22823	0.00177749	0.0220113	0.22924	0.365345	0.136105	No	No	No
C1orf61	cg17727529	1.04055	0.32241	3.22741	0.00178202	0.0220435	0.144432	0.247081	0.102649	No	No	No
ACMSD	cg18766847	1.37794	0.426932	3.22753	0.00178135	0.0220435	0.371719	0.419577	0.0478581	No	No	No
RAB32	cg22030890	1.08702	0.336836	3.22716	0.00178339	0.0220486	0.0478088	0.110567	0.0627587	No	Yes	No
FLJ37549	cg25875213	0.472316	0.146396	3.22629	0.0017882	0.0220962	0.0637001	0.253248	0.189548	No	No	No
DNAJB6	cg11695266	0.738649	0.229047	3.22488	0.00179609	0.0221698	0.0821675	0.220352	0.138184	No	No	No
DIAPH2	cg07917796	1.02521	0.31794	3.22453	0.00179804	0.0221701	0.0947303	0.171237	0.0765067	No	No	No
VSX1	cg23097006	0.580906	0.180144	3.22468	0.00179718	0.0221701	0.149298	0.420119	0.270821	Yes	Yes	Yes
PARVA	cg01781266	2.86639	0.889433	3.22271	0.00180819	0.0222713	0.0726129	0.100522	0.0279092	No	No	No
GAS2L1	cg02293044	1.12731	0.349964	3.22122	0.00181657	0.0223385	0.112543	0.171323	0.0587801	No	No	No
CTNNAL1	cg05485060	1.08812	0.337785	3.22134	0.00181591	0.0223385	0.28621	0.357877	0.0716672	No	No	No
FUT1	cg13881341	0.990415	0.307441	3.22148	0.00181511	0.0223385	0.229502	0.307852	0.0783499	No	No	No
MARCKSL1	cg06434451	0.839075	0.260585	3.21996	0.00182368	0.022402	0.475435	0.59722	0.121785	No	No	No
FOXD4L1	cg08451957	1.67972	0.522542	3.21451	0.00185475	0.0227715	0.696458	0.792049	0.0955905	Yes	Yes	Yes
CYP27B1	cg04905829	1.26355	0.393192	3.21358	0.00186014	0.0228254	0.192603	0.26356	0.070957	Yes	Yes	Yes
C1orf76	cg13449778	0.642704	0.200057	3.21261	0.00186569	0.022869	0.0347919	0.142222	0.10743	Yes	Yes	Yes
TAGLN	cg24619694	0.870508	0.271078	3.21128	0.00187343	0.0229517	0.429267	0.566852	0.137585	No	No	No
C1orf177	cg20903926	1.2318	0.383893	3.20871	0.00188837	0.0231224	0.730538	0.856848	0.12631	No	No	No
HOXD9	cg10957151	0.709626	0.221252	3.20732	0.00189652	0.0232079	0.143715	0.326288	0.182573	Yes	Yes	Yes
KCNJ8	cg01226811	1.33594	0.416636	3.20649	0.00190139	0.0232322	0.0558794	0.0957056	0.0398262	No	No	No
LAMA4	cg14289461	0.83399	0.260088	3.20656	0.00190094	0.0232322	0.236099	0.415303	0.179204	No	No	No
HIST1H1A	cg14652095	1.05853	0.330198	3.20574	0.00190578	0.0232736	0.558174	0.739722	0.181548	No	No	No
HOXC9	cg21272774	0.64729	0.202146	3.2021	0.00192738	0.0235123	0.167589	0.383831	0.216242	Yes	Yes	No
SLC6A13	cg20804101	1.07868	0.336986	3.20095	0.00193422	0.0235832	0.189018	0.252728	0.0637103	No	No	No
ELOVL4	cg19439399	0.599863	0.187425	3.20055	0.00193661	0.0235999	0.101344	0.234675	0.133332	No	No	No
CSPG4	cg13230197	1.4907	0.46592	3.19948	0.00194301	0.0236652	0.105925	0.171641	0.0657162	No	No	No
TACSTD1	cg16076328	0.855871	0.267554	3.19887	0.00194669	0.0236849	0.164888	0.295099	0.130211	No	No	No
CTSK	cg11946165	0.982971	0.307313	3.1986	0.00194832	0.0236922	0.361007	0.498734	0.137728	No	No	No
C9orf121	cg05507459	1.76869	0.553046	3.19808	0.00195145	0.0237095	0.126988	0.178516	0.0515286	No	No	No
SLC9A7	cg14841098	1.1191	0.350105	3.19648	0.00196112	0.02381	0.508281	0.597497	0.0892162	No	No	No
CMKLR1	cg06933965	0.767821	0.240278	3.19555	0.00196675	0.0238657	0.0872152	0.222057	0.134841	NA	NA	NA
ALDH1A2	cg03365437	0.459304	0.143886	3.19214	0.0019875	0.0240665	0.131645	0.370677	0.239033	No	No	No
ARPC2	cg08216808	0.950907	0.297906	3.19198	0.00198854	0.0240665	0.0969229	0.197443	0.10052	No	No	No
PTRF	cg14070162	1.58328	0.496379	3.18965	0.00200285	0.024227	0.14196	0.196995	0.055035	No	No	No
SLC18A3	cg11389172	0.536131	0.16811	3.18916	0.00200585	0.0242378	0.0343083	0.217116	0.182808	Yes	Yes	No
PCDHGB7	cg14011639	0.639393	0.20057	3.18787	0.00201385	0.0243088	0.143034	0.416085	0.273051	No	No	No
ATP10A	cg10734665	0.562194	0.176368	3.18762	0.00201544	0.0243152	0.396592	0.612782	0.21619	No	No	No
RB1	cg27182551	5.49317	1.72338	3.18743	0.00201658	0.0243163	0.920168	0.948479	0.0283117	No	No	No
TBC1D14	cg12958778	0.827237	0.25956	3.18707	0.00201883	0.0243178	0.171097	0.290546	0.119448	No	No	No
RIT2	cg22039287	1.20251	0.377305	3.1871	0.00201865	0.0243178	0.337421	0.395442	0.0580218	NA	NA	NA
PCDHB16	cg11864993	0.815626	0.255944	3.18674	0.00202088	0.0243297	0.346401	0.53754	0.19114	NA	NA	NA
SNRPN	cg24993443	1.03518	0.324989	3.18527	0.00203007	0.024402	0.726423	0.82032	0.0938975	No	No	No
AHNAK	cg19764555	1.00632	0.316029	3.18426	0.00203639	0.0244396	0.0903054	0.178163	0.0878577	NA	NA	NA
SLC6A12	cg03139377	0.993038	0.311905	3.18378	0.00203937	0.0244625	0.19572	0.300619	0.104898	NA	NA	NA
TEKT1	cg13337865	0.901801	0.283803	3.17756	0.00207877	0.0248573	0.0583643	0.146058	0.0876941	NA	NA	NA
TGFB3	cg08615333	0.837443	0.26367	3.1761	0.00208812	0.024956	0.339622	0.466304	0.126682	No	No	No
FLJ90166	cg14546153	0.708409	0.223059	3.17588	0.00208954	0.02496	0.10952	0.292396	0.182876	Yes	No	No
HSPC152	cg11296937	1.63165	0.513973	3.17458	0.00209794	0.0250473	0.137276	0.206868	0.0695917	No	No	No
GDNF	cg07442479	0.688657	0.216993	3.17364	0.00210398	0.0250934	0.115898	0.252696	0.136797	Yes	Yes	Yes
SMURF2	cg25629694	0.867966	0.273485	3.17373	0.0021034	0.0250934	0.120041	0.269607	0.149567	No	No	No
PGK1	cg10560144	1.41093	0.444711	3.1727	0.00211009	0.0250943	0.526806	0.603868	0.0770626	No	No	No
MSX1	cg15696627	6.81793	2.14896	3.17266	0.00211031	0.0250943	0.0368894	0.0492948	0.0124054	Yes	Yes	Yes
BCL2	cg21602520	0.738456	0.232743	3.17283	0.00210919	0.0250943	0.0781069	0.149286	0.0711788	Yes	Yes	Yes
GPR25	cg21870884	0.453499	0.142942	3.17261	0.00211062	0.0250943	0.11664	0.353706	0.237066	No	No	No
NPY5R	cg18438777	0.426933	0.13459	3.17211	0.00211391	0.0251204	0.164163	0.401409	0.237246	Yes	No	Yes
NNMT	cg14209518	0.91008	0.287112	3.16977	0.0021291	0.0252617	0.354251	0.495372	0.141121	No	No	No
CYP4F3	cg16377880	0.780683	0.246288	3.1698	0.00212895	0.0252617	0.208098	0.284222	0.0761237	NA	NA	NA
RBP4	cg12936747	2.68575	0.847532	3.1689	0.0021348	0.0253032	0.0845106	0.111688	0.0271776	Yes	Yes	Yes
PPP2R4	cg25587233	1.18029	0.372573	3.16795	0.00214105	0.0253511	0.609093	0.74481	0.135717	No	No	No
BCL7C	cg22377963	1.66402	0.525294	3.16778	0.00214216	0.0253511	0.111227	0.15259	0.0413627	No	No	No
ISL1	cg26896762	0.666044	0.210285	3.16733	0.0021451	0.0253729	0.147127	0.335827	0.1887	Yes	Yes	Yes
BRD4	cg02533173	1.54734	0.488683	3.16634	0.00215166	0.0254374	0.215227	0.273309	0.0580829	NA	NA	NA
AOX1	cg12627583	0.501066	0.158302	3.16526	0.00215879	0.0255085	0.0698073	0.246681	0.176874	No	No	No
WNK4	cg08108311	0.458242	0.144851	3.16354	0.00217021	0.0256039	0.0592444	0.195952	0.136707	No	No	No
CREB5	cg10822172	1.26694	0.400538	3.1631	0.00217316	0.0256159	0.200845	0.253015	0.0521695	No	No	No
COL4A2	cg19385139	1.52512	0.482168	3.16305	0.00217345	0.0256159	0.292721	0.35893	0.0662091	No	No	No
TGFB1I1	cg10995380	1.48202	0.468819	3.16118	0.00218597	0.0257275	0.178712	0.223329	0.0446173	No	No	No
PRRT1	cg25426302	0.693885	0.219508	3.16109	0.00218655	0.0257275	0.234301	0.359629	0.125327	No	No	Yes
PCDHB3	cg01512854	0.983734	0.311271	3.16038	0.00219132	0.0257451	0.368285	0.503477	0.135192	No	No	No
SH3PX3	cg27635271	0.551876	0.174631	3.16024	0.00219227	0.0257451	0.291767	0.498155	0.206388	No	No	No
DNAJC5	cg14448145	1.5212	0.48145	3.15962	0.00219641	0.0257806	0.196092	0.257309	0.0612172	No	No	No
MYADM	cg19717326	1.3156	0.416446	3.15912	0.00219977	0.0257937	0.205192	0.264727	0.0595351	No	No	No
GSPT2	cg22601215	0.737615	0.233479	3.15924	0.00219901	0.0257937	0.325425	0.503873	0.178448	No	No	No
GPHA2	cg03245641	0.825376	0.261366	3.15794	0.00220778	0.0258085	0.233197	0.333251	0.100054	No	No	No
DISP1	cg10942056	0.810262	0.256536	3.15847	0.0022042	0.0258085	0.326357	0.388955	0.0625982	NA	NA	NA
GPR35	cg13097816	0.6426	0.203469	3.15822	0.00220586	0.0258085	0.423993	0.651765	0.227772	NA	NA	NA
BAPX1	cg20073553	0.698239	0.22107	3.15845	0.0022043	0.0258085	0.325502	0.551098	0.225595	Yes	Yes	Yes
CSDC2	cg25447894	0.740606	0.234505	3.15817	0.00220619	0.0258085	0.258898	0.426816	0.167918	No	No	No
FAM101A	cg21453309	0.60312	0.191185	3.15464	0.00223019	0.0260307	0.122025	0.275971	0.153945	No	No	No
FLJ38159	cg14137939	0.589019	0.186765	3.1538	0.00223589	0.0260707	0.22268	0.383138	0.160458	No	No	No
NAPRT1	cg15537850	0.671311	0.212872	3.15359	0.00223734	0.0260743	0.387349	0.47539	0.0880402	NA	NA	NA
ZSCAN1	cg21331821	0.574397	0.18216	3.15326	0.00223965	0.026088	0.118132	0.27927	0.161138	No	No	No
GRB7	cg17740645	0.786864	0.249694	3.15131	0.00225298	0.02623	0.0899488	0.185565	0.0956162	No	No	No
AMOT	cg27581839	0.91848	0.291477	3.15112	0.00225429	0.0262319	0.371028	0.49174	0.120711	Yes	Yes	No
HOXC11	cg07123069	0.529369	0.168046	3.15015	0.00226103	0.0262765	0.181324	0.393313	0.211989	Yes	Yes	Yes
EMILIN1	cg15895197	0.836159	0.265441	3.15007	0.00226156	0.0262765	0.375501	0.535392	0.15989	No	No	No
LDHD	cg24429836	1.39182	0.441881	3.14975	0.00226379	0.0262892	0.173377	0.219227	0.0458503	No	No	No
ZNF167	cg06566994	0.819571	0.260255	3.14911	0.00226821	0.0263139	0.472428	0.651896	0.179467	No	No	No
FLJ14503	cg10009830	1.00203	0.318255	3.14851	0.00227237	0.0263484	0.382784	0.512469	0.129684	Yes	Yes	No
GBX2	cg23095584	0.629485	0.199941	3.14835	0.00227348	0.0263484	0.135155	0.331028	0.195873	Yes	Yes	Yes
FGF5	cg18638496	0.544004	0.17289	3.14654	0.00228613	0.0264816	0.0997265	0.257419	0.157692	Yes	Yes	Yes
C10orf26	cg09405083	1.29828	0.412696	3.14585	0.00229094	0.0265106	0.126166	0.183606	0.0574401	No	No	No
FBXL22	cg13288195	0.715072	0.227327	3.14557	0.00229292	0.0265201	0.326224	0.4672	0.140976	No	No	No
FLJ11155	cg19843036	3.1154	0.990542	3.14515	0.00229584	0.0265266	0.0665563	0.0940064	0.0274501	No	No	No
FLJ38159	cg24939733	1.19831	0.381023	3.14499	0.00229694	0.0265266	0.301802	0.38153	0.0797271	No	No	No
ALK	cg18277754	0.528252	0.168002	3.14432	0.00230164	0.0265675	0.0597656	0.229245	0.16948	NA	NA	NA
FLJ90166	cg23418591	0.550855	0.175401	3.14055	0.00232827	0.0268478	0.158375	0.390991	0.232617	Yes	No	No
ALDH1A3	cg19177941	0.778198	0.247841	3.13991	0.00233286	0.0268872	0.0552671	0.186687	0.13142	No	No	No
TNFRSF10C	cg14015044	0.466876	0.148725	3.13919	0.00233796	0.0269325	0.0965911	0.331078	0.234487	No	No	No
CALCA	cg09068492	0.591246	0.188375	3.13866	0.00234172	0.0269623	0.139992	0.29675	0.156758	Yes	Yes	Yes
AQP3	cg26624914	0.92539	0.294865	3.13835	0.00234398	0.0269748	0.391132	0.545658	0.154526	No	No	No
EDAR	cg01124420	1.97569	0.62959	3.13805	0.00234612	0.0269859	0.0683486	0.109972	0.0416233	No	No	No
CYTL1	cg01114088	0.567758	0.181056	3.13582	0.00236213	0.0271564	0.159534	0.317757	0.158223	No	No	No
SUSD1	cg04230060	0.700454	0.223467	3.13449	0.00237171	0.0272393	0.454587	0.649086	0.194499	No	No	No
LHX1	cg22660578	0.502009	0.160201	3.13363	0.00237794	0.0272972	0.253539	0.485691	0.232152	No	No	No
ZIM2	cg01656470	1.37889	0.44014	3.13284	0.00238368	0.0273221	0.718353	0.792813	0.07446	No	No	No
PCDHGA12	cg07730329	0.893609	0.285226	3.13299	0.00238257	0.0273221	0.304381	0.503847	0.199466	No	No	No
CCDC3	cg22750254	0.458665	0.146394	3.13309	0.00238188	0.0273221	0.10513	0.224957	0.119827	No	No	No
FLJ46365	cg25538571	0.744212	0.237639	3.13168	0.00239207	0.0274046	0.290649	0.474167	0.183518	No	No	No
ATP6V1B1	cg06946880	0.841374	0.268721	3.13103	0.00239682	0.0274453	0.58014	0.728245	0.148106	No	No	No
GABBR2	cg02058918	0.473626	0.1513	3.13039	0.00240153	0.0274718	0.133907	0.303228	0.169321	Yes	No	Yes
SMARCA1	cg10076009	0.945765	0.302114	3.13049	0.00240079	0.0274718	0.344847	0.488609	0.143762	No	No	No
EHHADH	cg11935638	1.3097	0.418475	3.12969	0.00240665	0.0275167	0.149631	0.201046	0.0514152	No	No	No
DDAH1	cg14322224	1.52538	0.487734	3.12749	0.00242281	0.0276517	0.120074	0.159718	0.039644	Yes	Yes	Yes
CCND2	cg08069899	0.586307	0.187643	3.12458	0.00244434	0.0278505	0.0376991	0.184377	0.146678	No	No	No
MLC1SA	cg25954162	1.64575	0.526868	3.12365	0.00245124	0.0279016	0.127666	0.173022	0.0453559	No	No	No
GPX1	cg06613840	0.906158	0.290138	3.1232	0.00245465	0.0279254	0.239786	0.346895	0.107109	No	No	No
GLRA3	cg19968631	0.716501	0.229424	3.12305	0.00245577	0.0279254	0.132331	0.30693	0.1746	No	No	No
ZNF559	cg26674132	1.68285	0.538908	3.1227	0.00245837	0.0279411	0.171968	0.211268	0.0393004	No	No	No
NDUFA1	cg14616651	1.06861	0.34224	3.12241	0.00246056	0.0279522	0.539193	0.646665	0.107471	No	No	No
FLJ41131	cg03060925	5.41359	1.7346	3.12095	0.00247151	0.0280626	0.0576532	0.0709897	0.0133366	No	No	No
DAPK2	cg23165541	0.935426	0.299766	3.12052	0.00247473	0.0280853	0.226851	0.28491	0.0580591	NA	NA	NA
C22orf23	cg14127659	0.670832	0.214998	3.12018	0.00247726	0.0281001	0.328506	0.51202	0.183514	No	No	No
PODN	cg23092823	0.496479	0.159211	3.11837	0.00249092	0.0282411	0.109831	0.318216	0.208386	Yes	Yes	Yes
ZNF366	cg15037004	1.69863	0.544803	3.11788	0.00249465	0.0282658	0.316237	0.388556	0.0723192	No	No	No
CART1	cg02409351	0.500236	0.160584	3.11511	0.0025157	0.0284628	0.0834256	0.402618	0.319193	Yes	Yes	No
LOC349136	cg19831077	0.678403	0.217862	3.11392	0.00252482	0.0285409	0.239251	0.439976	0.200725	No	No	No
HCN4	cg02860342	0.654206	0.210162	3.11287	0.00253287	0.0286178	0.299721	0.459118	0.159397	Yes	No	Yes
ZNF491	cg23673107	0.630148	0.20248	3.11215	0.00253837	0.0286659	0.151164	0.300266	0.149102	NA	NA	NA
TSPAN2	cg03614513	0.465561	0.149652	3.11096	0.00254758	0.0287416	0.0873223	0.249633	0.16231	No	No	No
ADAMTS13	cg14802951	0.893057	0.287154	3.11002	0.0025548	0.0288089	0.420189	0.582569	0.16238	No	No	No
SCNM1	cg24262376	1.00829	0.324246	3.10964	0.00255776	0.028814	0.360204	0.481961	0.121758	No	No	No
ITGA9	cg25870420	0.513866	0.165269	3.10927	0.00256067	0.0288326	0.0838133	0.26442	0.180607	No	No	No
NEUROG3	cg03425110	0.561847	0.180721	3.10891	0.00256344	0.0288496	0.100664	0.296653	0.195989	Yes	Yes	Yes
LCE3A	cg26466858	0.787621	0.253488	3.10714	0.00257727	0.0289769	0.300922	0.436788	0.135866	No	No	No
RAB37	cg12448933	0.624145	0.200916	3.10649	0.0025823	0.0290193	0.0542487	0.186554	0.132305	No	No	No
MTCP1	cg03595428	1.08371	0.348988	3.10529	0.00259175	0.0291112	0.455424	0.575308	0.119884	No	No	No
SCUBE1	cg26219051	0.899291	0.289867	3.10243	0.00261427	0.0293068	0.0876666	0.198759	0.111092	No	No	No
PLA2G2E	cg24613957	2.51797	0.811718	3.10203	0.00261746	0.0293282	0.876263	0.910067	0.0338042	No	No	No
RORC	cg18149207	0.911494	0.294171	3.09852	0.00264541	0.0295692	0.491812	0.642204	0.150391	No	No	No
PPP1R3C	cg09775312	0.518468	0.167421	3.09679	0.00265927	0.0296855	0.0776037	0.202909	0.125305	No	No	No
GPR6	cg12800028	1.471	0.475066	3.09641	0.00266227	0.0296855	0.110899	0.1695	0.0586005	No	Yes	Yes
OVCA2	cg13315690	1.77041	0.572015	3.09504	0.00267337	0.0297947	0.0785516	0.134222	0.0556704	No	No	No
FLJ43582	cg23843812	3.2182	1.0414	3.09026	0.00271225	0.0301257	0.0582576	0.0784386	0.0201809	No	No	No
ARMCX5	cg11810837	1.09267	0.353884	3.08764	0.00273377	0.0303353	0.260734	0.351287	0.0905524	No	No	No
GRM3	cg14724613	0.65574	0.212462	3.08639	0.00274413	0.0304311	0.111907	0.256224	0.144316	No	Yes	No
SERPINF1	cg22242539	0.672943	0.218044	3.08627	0.00274505	0.0304311	0.194351	0.324134	0.129783	NA	NA	NA
FLJ34503	cg19815376	0.785056	0.254424	3.08562	0.0027505	0.0304621	0.184876	0.297297	0.112422	No	No	No
PDPN	cg18877506	0.392939	0.127366	3.08512	0.00275466	0.0304935	0.0657482	0.331666	0.265917	No	No	No
SFRP5	cg05937453	0.445463	0.144421	3.08448	0.00275992	0.0305327	0.0710492	0.295704	0.224655	Yes	Yes	Yes
TAS2R48	cg21874193	1.40599	0.455961	3.08358	0.00276745	0.0305761	0.364152	0.449161	0.0850091	No	No	No
CRISP2	cg08942800	0.833836	0.270499	3.08258	0.00277579	0.0306534	0.426529	0.584327	0.157798	No	No	No
PODN	cg16028753	0.796144	0.258301	3.08223	0.00277875	0.0306714	0.0717003	0.235327	0.163627	Yes	Yes	Yes
DDX19B	cg14244577	1.37648	0.446686	3.08153	0.00278456	0.030706	0.132811	0.215935	0.0831238	No	No	No
SLC15A1	cg10694152	1.1972	0.388663	3.08031	0.00279485	0.0308047	0.0587273	0.13174	0.0730132	No	No	No
PCDHAC2	cg24076884	0.765621	0.24862	3.07948	0.00280186	0.0308671	0.506152	0.626344	0.120192	No	No	No
MMP14	cg09208010	1.24507	0.405029	3.07403	0.00284822	0.0313328	0.0962429	0.160742	0.0644995	No	No	No
GATA4	cg08369065	0.525754	0.171101	3.07276	0.00285909	0.0314235	0.154854	0.433538	0.278684	Yes	Yes	Yes
ARSE	cg11964613	1.11104	0.361744	3.07134	0.00287135	0.0315419	0.282007	0.363652	0.0816448	No	No	No
CACNB2	cg01805540	0.375374	0.122238	3.07084	0.00287563	0.0315738	0.0781722	0.373493	0.295321	No	No	No
HCRTR2	cg17063201	0.968325	0.315468	3.06948	0.00288743	0.0316579	0.459992	0.577973	0.117981	No	No	No
FLJ23514	cg25500444	0.795253	0.259077	3.06956	0.00288672	0.0316579	0.191907	0.34799	0.156083	No	No	No
MAGI2	cg20537629	0.756291	0.246535	3.06768	0.0029031	0.0317994	0.245003	0.403656	0.158653	No	Yes	No
AOC3	cg09040752	0.893351	0.2913	3.06677	0.00291106	0.0318166	0.231162	0.395564	0.164402	NA	NA	NA
RB1	cg19254235	1.33144	0.434109	3.06707	0.00290847	0.0318166	0.459535	0.571212	0.111677	No	No	No
NUCB1	cg21252483	1.09716	0.357728	3.06701	0.00290895	0.0318166	0.565835	0.724307	0.158471	No	No	No
APC	cg21634602	0.521205	0.16995	3.06681	0.00291075	0.0318166	0.105063	0.205939	0.100875	No	No	No
CA3	cg22289837	0.904572	0.294965	3.06671	0.0029116	0.0318166	0.296449	0.452857	0.156408	Yes	Yes	No
ACVR1	cg09499849	1.05554	0.344234	3.06634	0.00291478	0.0318362	0.200657	0.262658	0.0620005	No	No	No
ZNF285	cg26918645	0.465161	0.151715	3.06602	0.00291759	0.0318517	0.0852538	0.360109	0.274855	No	No	No
EXOC6	cg19780563	1.07414	0.350362	3.06579	0.00291962	0.0318587	0.474727	0.576886	0.102159	No	No	No
CMKOR1	cg03626672	1.6977	0.553918	3.0649	0.00292744	0.0318986	0.176091	0.208129	0.0320382	No	No	No
TRPA1	cg06493386	0.561405	0.183165	3.06502	0.00292639	0.0318986	0.0779558	0.308153	0.230198	Yes	Yes	No
ACOT12	cg21942082	0.677908	0.22122	3.0644	0.00293185	0.0319315	0.113285	0.260233	0.146947	No	No	No
KCNQ5	cg15717808	0.425215	0.138833	3.06278	0.00294616	0.0320569	0.0453553	0.359185	0.313829	No	Yes	Yes
CXCL1	cg02029926	0.618723	0.20205	3.06223	0.00295104	0.0320795	0.155958	0.289119	0.133161	Yes	No	No
KRT6A	cg11471401	1.06062	0.346641	3.05971	0.00297342	0.0322208	0.239957	0.322484	0.0825266	No	No	No
TPM2	cg24070292	0.889164	0.290624	3.0595	0.00297525	0.0322208	0.12188	0.233019	0.11114	No	No	No
HPSE2	cg03388193	0.832593	0.272189	3.05887	0.00298088	0.0322664	0.238368	0.389524	0.151156	Yes	Yes	Yes
TIGD5	cg14292823	0.751947	0.245925	3.05762	0.00299207	0.0323418	0.403832	0.488506	0.0846745	No	Yes	No
LOC283849	cg21142272	0.739793	0.241938	3.05778	0.00299071	0.0323418	0.368454	0.564021	0.195567	No	No	No
MANSC1	cg19491035	1.7457	0.571241	3.05598	0.00300682	0.0324554	0.0891964	0.132807	0.0436105	No	No	No
SLC32A1	cg03556497	0.702282	0.229846	3.05544	0.00301171	0.032493	0.106741	0.243624	0.136882	Yes	Yes	Yes
MCF2L2	cg27239157	0.977408	0.319984	3.05455	0.00301978	0.0325647	0.0725374	0.137266	0.0647282	No	No	No
MGC72075	cg01758870	1.1116	0.364053	3.0534	0.00303021	0.0326618	0.485541	0.57828	0.0927388	No	No	No
MAMDC2	cg13870494	1.41155	0.462326	3.05314	0.00303254	0.0326716	0.246383	0.30357	0.0571871	No	No	No
RPRM	cg27420236	0.440954	0.14447	3.05223	0.00304081	0.03273	0.0756417	0.336804	0.261162	No	No	No
SRPX2	cg19481953	1.2533	0.410673	3.05181	0.00304461	0.0327556	0.366396	0.442975	0.0765788	Yes	No	No
LOC348840	cg02141570	1.30862	0.428873	3.0513	0.00304931	0.0327754	0.463813	0.560457	0.0966433	NA	NA	NA
ZNF501	cg04389838	0.90147	0.295648	3.04914	0.00306913	0.0329268	0.148581	0.337533	0.188952	No	No	No
ECHDC3	cg23960723	0.980492	0.32165	3.04832	0.00307666	0.0329614	0.0930998	0.189195	0.0960947	No	No	No
FMOD	cg03764585	1.84845	0.606423	3.04812	0.00307847	0.0329654	0.0487599	0.0860802	0.0373203	No	No	No
APOE	cg14123992	0.865287	0.283981	3.04699	0.00308886	0.0330457	0.340493	0.446781	0.106288	No	No	No
RPE65	cg11724759	1.17395	0.385424	3.04588	0.00309917	0.0331098	0.269318	0.348626	0.0793084	No	No	No
IZUMO1	cg10234985	0.627973	0.206236	3.04492	0.00310808	0.0331895	0.416334	0.596692	0.180358	No	No	No
DKK4	cg01762581	1.11298	0.365684	3.04357	0.00312065	0.033292	0.252029	0.308049	0.0560194	No	No	No
KCNQ1	cg16609872	1.05739	0.347437	3.04339	0.00312234	0.033292	0.114485	0.186254	0.0717693	No	Yes	Yes
GRIA2	cg25148589	1.13129	0.371737	3.04327	0.00312348	0.033292	0.080797	0.180301	0.0995039	Yes	Yes	Yes
SNRPN	cg11265941	1.01804	0.334578	3.04277	0.00312809	0.0333103	0.335484	0.47181	0.136325	No	No	No
PPP1R13L	cg03554552	2.1015	0.690934	3.04153	0.00313975	0.033388	0.0638443	0.0975883	0.033744	No	No	No
POU3F4	cg20065832	1.13438	0.37295	3.04165	0.00313859	0.033388	0.231097	0.353567	0.122471	Yes	Yes	Yes
PQBP1	cg14520448	0.844939	0.277962	3.03977	0.00315631	0.0335294	0.329683	0.428717	0.0990343	No	No	No
BCL9L	cg20029201	0.825478	0.27157	3.03965	0.00315744	0.0335294	0.266711	0.336298	0.069587	No	No	No
KCNK3	cg01643580	0.535858	0.17643	3.03722	0.0031804	0.0337461	0.151457	0.30198	0.150523	No	No	Yes
ITGBL1	cg03386869	0.633212	0.208561	3.0361	0.00319102	0.0338391	0.494488	0.677115	0.182627	No	No	No
TPTE	cg02148834	3.24361	1.06955	3.0327	0.00322361	0.0341532	0.897447	0.933235	0.0357883	NA	NA	NA
EPSTI1	cg22905097	0.665358	0.219437	3.03212	0.00322918	0.0341964	0.0792149	0.235592	0.156377	No	No	No
APOA2	cg01053621	1.104	0.364409	3.02955	0.00325403	0.0344278	0.666145	0.761315	0.0951702	No	No	No
MYOT	cg04956382	1.7126	0.565618	3.02783	0.00327068	0.0345721	0.313232	0.384951	0.071719	No	No	No
DLX5	cg06537230	1.9523	0.644862	3.02747	0.00327424	0.0345938	0.0933945	0.139583	0.0461887	No	Yes	Yes
ADAMTSL1	cg16714091	1.02834	0.339747	3.02678	0.00328095	0.0346182	0.129819	0.199938	0.070118	No	No	No
GPR137	cg25400358	0.665463	0.219918	3.02595	0.00328905	0.0346705	0.465897	0.602961	0.137064	No	No	No
SLC27A6	cg07103493	1.76684	0.583987	3.02548	0.0032937	0.0347035	0.0513011	0.0907194	0.0394183	No	No	No
FAM58A	cg01140782	1.21807	0.402699	3.02477	0.00330069	0.0347613	0.423971	0.526091	0.10212	No	No	No
WDR69	cg14329157	0.651414	0.215375	3.02456	0.00330272	0.0347667	0.354103	0.590922	0.236819	No	No	No
GNMT	cg10862848	0.966605	0.31967	3.02376	0.00331065	0.0348023	0.242159	0.300918	0.058759	No	No	No
MANEAL	cg18105315	0.635143	0.210046	3.02383	0.00330993	0.0348023	0.108413	0.27666	0.168247	NA	NA	NA
PTPRO	cg10646402	0.485654	0.160633	3.02337	0.00331444	0.034824	0.0484189	0.252347	0.203928	No	No	No
ERBB2	cg22778981	1.44705	0.478643	3.02323	0.00331584	0.034824	0.182206	0.228023	0.0458171	No	No	No
PRICKLE2	cg23047271	0.989182	0.327252	3.02269	0.00332116	0.034833	0.169493	0.262073	0.0925803	No	No	No
PSEN2	cg05894797	3.3638	1.11323	3.02165	0.00333144	0.034925	0.0728511	0.0891152	0.016264	No	No	No
SMPD3	cg17217677	1.46051	0.483629	3.0199	0.00334883	0.0349954	0.825762	0.874579	0.0488172	No	No	Yes
ARTN	cg22930187	1.46943	0.486787	3.01864	0.00336144	0.0350952	0.149574	0.199573	0.0499998	No	No	No
GNAS	cg16833551	0.894156	0.296281	3.01793	0.00336849	0.0351044	0.616017	0.739752	0.123735	Yes	No	No
ABCB7	cg23279136	0.988787	0.327652	3.01779	0.00336989	0.0351044	0.32052	0.40795	0.0874304	No	No	No
CACNG4	cg26743024	1.19007	0.394353	3.01779	0.00336996	0.0351044	0.175454	0.259418	0.0839645	No	No	No
CST5	cg10423860	1.19071	0.394733	3.01649	0.00338293	0.0352234	0.0854402	0.16972	0.0842798	No	No	No
HIST1H4I	cg21269897	0.871824	0.289195	3.01466	0.00340139	0.0353675	0.257141	0.409722	0.152582	No	Yes	No
PLD5	cg12613383	0.982934	0.326128	3.01395	0.00340856	0.035426	0.0720386	0.146366	0.0743274	No	No	No
NEUROD1	cg02836529	1.22326	0.405962	3.01323	0.00341588	0.035486	0.168402	0.276941	0.108539	Yes	Yes	Yes
B4GALT2	cg23001650	2.51428	0.834467	3.01304	0.0034178	0.03549	0.0902415	0.123971	0.0337293	NA	NA	NA
NUMBL	cg08450982	0.523205	0.173677	3.01251	0.00342318	0.0355268	0.433296	0.634117	0.200821	No	No	No
SLC44A2	cg21663431	0.706026	0.234374	3.01239	0.00342445	0.0355268	0.312647	0.422636	0.109989	No	No	No
KCNV1	cg04237663	0.484952	0.16102	3.01174	0.00343101	0.0355788	0.0994766	0.40526	0.305783	Yes	Yes	Yes
SLC39A2	cg05245515	1.04421	0.346794	3.01105	0.00343808	0.035636	0.201937	0.263808	0.0618705	No	No	No
CDKL5	cg01885202	1.26397	0.419889	3.01025	0.0034462	0.035672	0.310264	0.42252	0.112256	No	No	No
PWWP2	cg00259755	1.4341	0.476733	3.00818	0.00346751	0.0358764	0.0628239	0.135783	0.0729596	No	No	No
40430	cg03330678	0.538319	0.179018	3.00706	0.00347896	0.0359623	0.330607	0.579273	0.248666	No	No	No
WISP2	cg03562120	1.00821	0.335393	3.00606	0.0034893	0.0359844	0.205902	0.322439	0.116537	No	No	No
FLJ32447	cg02245378	0.722035	0.240202	3.00595	0.0034905	0.0359844	0.301075	0.530137	0.229062	Yes	Yes	Yes
AGC1	cg06937608	0.655941	0.218182	3.00639	0.00348593	0.0359844	0.092014	0.247298	0.155284	Yes	No	Yes
LRFN3	cg15060813	0.648583	0.215731	3.00644	0.00348544	0.0359844	0.245131	0.380129	0.134998	No	No	No
NAB1	cg11778001	2.58372	0.859645	3.00556	0.00349452	0.0360097	0.0992553	0.118861	0.0196056	No	No	No
GPM6B	cg03003060	0.573351	0.190774	3.0054	0.00349616	0.0360105	0.0977095	0.255822	0.158112	Yes	Yes	Yes
MYST4	cg20721467	1.21193	0.403362	3.00456	0.00350486	0.0360771	0.375882	0.466201	0.090319	NA	NA	NA
PGRMC1	cg07876586	0.934167	0.310993	3.00382	0.00351261	0.0361313	0.567051	0.638733	0.0716815	No	No	No
FOXD2	cg15868302	0.545561	0.181664	3.00313	0.00351973	0.0361883	0.174938	0.313943	0.139005	Yes	Yes	Yes
F2RL2	cg00415993	1.05592	0.351658	3.00269	0.0035244	0.0362201	0.242647	0.303532	0.0608844	No	No	No
UNQ6411	cg15944856	1.08212	0.360422	3.00237	0.00352773	0.0362381	0.636186	0.734103	0.0979165	NA	NA	NA
MOS	cg05661838	0.644627	0.214722	3.00215	0.00352997	0.0362389	0.145624	0.318045	0.17242	No	No	No
PDE10A	cg24133115	0.806251	0.268566	3.00205	0.00353103	0.0362389	0.0602154	0.14937	0.0891547	No	Yes	Yes
OSBPL7	cg09911755	0.853751	0.284489	3.001	0.00354207	0.0363204	0.30934	0.392399	0.0830587	NA	NA	NA
SUPT16H	cg25820971	2.29394	0.765052	2.99841	0.00356932	0.0365835	0.0913646	0.115399	0.0240342	No	No	No
TNKS1BP1	cg12603560	1.26514	0.421962	2.99824	0.00357116	0.036586	0.245143	0.315309	0.0701666	NA	NA	NA
DKK2	cg01404615	0.70727	0.235924	2.99788	0.00357497	0.0366087	0.103578	0.207206	0.103627	Yes	Yes	Yes
PGPEP1	cg00420929	1.00107	0.333969	2.9975	0.00357897	0.0366239	0.231257	0.302774	0.071517	No	No	No
SLC6A13	cg15966757	0.85538	0.285385	2.99728	0.00358124	0.0366239	0.261218	0.351688	0.0904701	No	No	No
MADCAM1	cg26525091	0.692836	0.231143	2.99743	0.0035797	0.0366239	0.177223	0.322311	0.145088	No	No	Yes
GLRB	cg18344745	1.12762	0.376317	2.99646	0.00358997	0.0366641	0.223946	0.295731	0.0717852	No	No	No
INSL3	cg01413516	1.55095	0.517647	2.99616	0.00359318	0.0366701	0.795532	0.860137	0.0646045	No	No	No
SULT1C2	cg10236239	0.902773	0.301335	2.99592	0.00359577	0.0366745	0.239982	0.347195	0.107213	No	No	No
C20orf55	cg20289911	0.784686	0.261988	2.99512	0.00360428	0.0367286	0.208604	0.318787	0.110183	No	No	No
DEFB1	cg24292612	0.874695	0.292108	2.99443	0.00361165	0.0367711	0.257831	0.324952	0.0671213	No	No	No
MT1E	cg15134649	0.435541	0.145562	2.99213	0.00363622	0.0369557	0.0649915	0.325004	0.260012	NA	NA	NA
WISP1	cg03670238	0.647105	0.216285	2.99191	0.00363861	0.0369586	0.296228	0.358902	0.0626741	No	No	No
APC	cg15020645	0.542817	0.181434	2.99181	0.00363973	0.0369586	0.0894261	0.212987	0.123561	No	No	No
EHD3	cg08251399	0.678521	0.226817	2.99149	0.00364309	0.0369764	0.397837	0.535631	0.137794	No	No	No
MMP19	cg16725130	0.817873	0.273453	2.99091	0.00364935	0.0370072	0.188611	0.326716	0.138105	NA	NA	NA
UPF3A	cg07218880	1.51165	0.505953	2.98774	0.00368374	0.0372901	0.199995	0.238073	0.0380786	No	Yes	No
GLB1L	cg10862587	2.92103	0.977926	2.98697	0.00369215	0.0373587	0.0633928	0.0920259	0.0286331	No	No	No
MAOB	cg00121904	1.02425	0.343003	2.98613	0.00370128	0.0374213	0.227408	0.328614	0.101206	No	No	No
FLJ32569	cg14159672	0.596117	0.199739	2.98448	0.00371931	0.0375673	0.32142	0.556898	0.235478	No	No	No
DAK	cg25406518	0.801212	0.268599	2.98293	0.00373634	0.0377062	0.211478	0.341099	0.129622	No	No	No
NPIP	cg07792737	0.979129	0.328336	2.98209	0.00374566	0.037767	0.695772	0.826369	0.130597	NA	NA	NA
NIP	cg10201668	1.35134	0.45328	2.98124	0.00375508	0.0378454	0.055795	0.167617	0.111822	Yes	Yes	Yes
PRKCDBP	cg05628549	0.616919	0.207134	2.97836	0.00378708	0.038101	0.180544	0.343035	0.162491	No	No	No
IL22RA1	cg09152089	0.961305	0.322824	2.9778	0.00379335	0.0381016	0.108483	0.183078	0.0745954	No	No	No
RAPSN	cg15679098	1.64116	0.551096	2.97799	0.00379123	0.0381016	0.834402	0.872621	0.0382182	No	No	No
ADRB3	cg17619823	0.522552	0.175482	2.9778	0.00379331	0.0381016	0.0723991	0.22705	0.154651	Yes	Yes	Yes
EXTL1	cg18212039	0.935402	0.314129	2.97776	0.00379378	0.0381016	0.648558	0.791524	0.142966	No	No	No
HOXB5	cg16495265	1.2236	0.410936	2.9776	0.00379557	0.038103	0.150113	0.204216	0.0541034	NA	NA	NA
EPIM	cg07057831	2.76841	0.930184	2.9762	0.00381124	0.0382336	0.0649719	0.083859	0.0188871	No	No	No
MARK2	cg06204948	0.907685	0.305044	2.97559	0.0038181	0.0382789	0.12755	0.203289	0.0757393	NA	NA	NA
CA3	cg18674980	0.693096	0.233025	2.97434	0.0038322	0.0384035	0.195532	0.42978	0.234248	Yes	Yes	No
FAM19A4	cg23967169	0.556453	0.187266	2.97145	0.00386488	0.0386466	0.0717548	0.226052	0.154297	Yes	Yes	Yes
PMP22	cg08343834	1.23681	0.416732	2.96787	0.00390581	0.0390053	0.229755	0.30441	0.0746544	Yes	Yes	Yes
C20orf135	cg27272402	1.67243	0.563523	2.96782	0.00390646	0.0390053	0.776221	0.826784	0.0505635	No	No	No
PPYR1	cg20491707	0.631269	0.212754	2.96713	0.0039143	0.0390387	0.127084	0.313526	0.186442	No	No	No
SLC25A18	cg02555579	1.28541	0.433451	2.96553	0.00393282	0.0392065	0.319619	0.405941	0.0863219	No	No	No
UBQLN2	cg10009003	1.49983	0.506068	2.9637	0.00395397	0.0393489	0.316924	0.385093	0.0681685	No	No	No
FLJ20186	cg16504670	0.79601	0.268633	2.96318	0.00396003	0.0393922	0.458319	0.576089	0.117771	NA	NA	NA
CACNA2D1	cg06379754	2.33041	0.786556	2.9628	0.00396449	0.0394025	0.0397782	0.073089	0.0333109	No	No	No
COL12A1	cg08009622	0.693194	0.233963	2.96283	0.00396409	0.0394025	0.0800127	0.233662	0.153649	No	Yes	Yes
FLJ20152	cg02729303	1.1612	0.392038	2.96196	0.00397427	0.0394454	0.171719	0.222661	0.0509419	No	No	No
TFF3	cg04806409	0.671721	0.226771	2.96211	0.00397253	0.0394454	0.247042	0.333155	0.086113	No	No	No
RB1	cg07880715	0.99314	0.335377	2.96126	0.0039824	0.0394454	0.573089	0.728958	0.155869	No	No	No
IDS	cg09018810	1.55472	0.524989	2.96143	0.00398046	0.0394454	0.515748	0.567072	0.051324	No	No	No
UNQ1940	cg10725344	1.1175	0.377374	2.96125	0.00398256	0.0394454	0.299751	0.368533	0.0687816	No	No	No
C14orf132	cg16539629	0.729037	0.246111	2.96223	0.00397106	0.0394454	0.0624311	0.134756	0.0723248	No	No	Yes
FUNDC1	cg18511445	0.593444	0.200454	2.9605	0.00399133	0.0394982	0.111511	0.237083	0.125571	No	No	No
IGSF4B	cg08654655	0.853551	0.288391	2.9597	0.00400069	0.0395567	0.121836	0.225632	0.103796	Yes	No	No
TNFSF7	cg24778383	0.574244	0.194015	2.95979	0.00399964	0.0395567	0.0592364	0.218396	0.159159	Yes	Yes	Yes
C5	cg02552945	1.18689	0.401061	2.95937	0.00400459	0.0395782	0.392566	0.458653	0.0660872	No	No	No
TMEM109	cg10735607	0.658561	0.222606	2.95842	0.00401582	0.0396721	0.272615	0.343756	0.0711415	No	No	No
EEF1A2	cg22463915	0.684353	0.231547	2.95557	0.00404942	0.0399525	0.358161	0.501046	0.142885	No	No	No
SFRP1	cg22418909	0.551537	0.186661	2.95476	0.00405912	0.040031	0.0690767	0.224258	0.155182	Yes	Yes	Yes
PCSK1	cg23187653	0.677066	0.22919	2.95417	0.00406607	0.0400727	0.165755	0.320376	0.154621	No	No	No
GK	cg05238794	0.964846	0.326757	2.9528	0.00408253	0.0401928	0.20804	0.313221	0.105181	No	No	No
ENO2	cg13334990	0.594469	0.201418	2.95141	0.00409912	0.0403216	0.349187	0.459779	0.110592	NA	NA	NA
C7orf11	cg22284975	1.63889	0.555336	2.95116	0.00410212	0.0403338	0.0631626	0.100675	0.0375126	No	No	No
PTHLH	cg01333011	1.03781	0.351841	2.94966	0.00412018	0.0404767	0.214951	0.270237	0.0552863	Yes	Yes	Yes
CD8A	cg17108819	0.503518	0.170768	2.94855	0.00413365	0.0405705	0.0485403	0.183914	0.135373	Yes	Yes	Yes
C14orf68	cg19798224	1.35264	0.458767	2.94843	0.00413503	0.0405705	0.666735	0.771791	0.105056	No	No	No
FEZ1	cg19433435	0.972107	0.329747	2.94804	0.00413976	0.0405996	0.290812	0.417137	0.126324	Yes	Yes	Yes
SLITRK4	cg05801573	0.666209	0.226171	2.9456	0.00416945	0.0408036	0.28772	0.452729	0.165009	Yes	Yes	No
CASQ2	cg18942631	0.740842	0.25156	2.945	0.00417681	0.0408424	0.338686	0.481881	0.143195	No	No	No
NPFFR2	cg26656113	0.519106	0.176268	2.94499	0.00417697	0.0408424	0.310577	0.52159	0.211013	No	No	No
LMO7	cg22227965	1.33019	0.451825	2.94404	0.00418859	0.0409211	0.381017	0.432641	0.0516241	No	No	No
LYPD3	cg15014458	0.974932	0.331287	2.94287	0.00420294	0.0410439	0.105036	0.186568	0.0815314	No	No	No
POU4F3	cg23303408	0.60104	0.204254	2.94261	0.00420604	0.0410567	0.165092	0.330518	0.165426	Yes	Yes	Yes
TXK	cg02600394	1.03204	0.350981	2.94043	0.00423301	0.0412672	0.657637	0.780616	0.122979	No	No	No
NOS1	cg03538436	0.539659	0.183545	2.9402	0.00423584	0.0412773	0.0706768	0.231022	0.160346	Yes	No	No
TSPYL5	cg00186701	0.704557	0.239642	2.94004	0.00423776	0.0412785	0.388216	0.600532	0.212316	No	No	No
IGF1	cg01305421	1.299	0.442095	2.93829	0.00425955	0.041438	0.30555	0.410644	0.105093	No	No	No
BHLHB5	cg22766145	0.749996	0.255322	2.93745	0.00427004	0.0415225	0.18639	0.349324	0.162934	Yes	Yes	Yes
TMEM71	cg20955688	0.964508	0.328462	2.93644	0.00428265	0.0416275	0.145592	0.25056	0.104967	No	No	No
C16orf25	cg10163825	1.48216	0.504968	2.93515	0.00429875	0.0417487	0.0780797	0.131613	0.053533	No	No	No
NAALAD2	cg21500966	0.865883	0.295052	2.93468	0.0043047	0.0417887	0.121737	0.205539	0.0838015	No	No	No
CSNK1D	cg19761273	2.47622	0.844232	2.93311	0.00432442	0.0419447	0.0563665	0.0870566	0.03069	No	No	No
MAPK8	cg19612574	1.14527	0.390642	2.93176	0.00434152	0.0420573	0.361324	0.435072	0.073748	No	No	No
CDK5R1	cg04106785	0.731379	0.249525	2.93109	0.00435001	0.0421218	0.406843	0.535828	0.128985	No	No	No
A4GALT	cg07393322	1.97642	0.67433	2.93094	0.0043519	0.0421223	0.0804324	0.114477	0.0340448	No	No	No
GDF5	cg03547924	0.721097	0.246139	2.92964	0.00436844	0.0422289	0.22579	0.313327	0.0875375	No	No	No
SPTB	cg20851097	1.43956	0.49146	2.92914	0.00437474	0.042272	0.460833	0.550946	0.0901127	Yes	No	Yes
TF	cg24879335	0.753191	0.257175	2.9287	0.00438034	0.0422728	0.0988264	0.203251	0.104425	No	No	No
CRHR2	cg14896516	0.445616	0.152209	2.92766	0.00439366	0.0423538	0.101411	0.310263	0.208852	No	No	No
IMPACT	cg22757447	0.551319	0.188317	2.92761	0.00439427	0.0423538	0.0969686	0.216458	0.119489	No	No	No
TRPC1	cg24794531	0.543092	0.185554	2.92687	0.00440383	0.0424103	0.0813755	0.213172	0.131797	No	No	No
PDK4	cg22171829	1.54965	0.529483	2.92671	0.00440581	0.0424117	0.0962978	0.138436	0.0421384	No	No	No
AFG3L1	cg13969584	0.686444	0.234661	2.92526	0.00442449	0.0425736	0.132652	0.296152	0.1635	No	No	No
PGM5	cg09230173	1.767	0.604253	2.92427	0.00443722	0.0426782	0.0337476	0.0885331	0.0547855	Yes	Yes	Yes
FLJ46156	cg01129459	0.672342	0.22997	2.92361	0.0044458	0.0427428	0.186377	0.391801	0.205423	No	No	No
CTNNA1	cg02276665	1.61832	0.553787	2.92228	0.00446307	0.0428813	0.230747	0.26075	0.0300032	No	No	No
ZPBP2	cg14914852	1.61063	0.552113	2.91721	0.00452931	0.0434077	0.709505	0.786811	0.0773066	No	No	No
PDPN	cg10743104	0.445232	0.152663	2.91643	0.00453961	0.0434808	0.0770162	0.275242	0.198226	No	No	No
DMRT2	cg00250430	0.555212	0.190437	2.91547	0.00455238	0.0435306	0.196907	0.390167	0.19326	Yes	Yes	Yes
C16orf30	cg11375102	0.819778	0.281316	2.91408	0.00457078	0.0436883	0.382615	0.540361	0.157746	No	No	No
LDB2	cg08899626	1.07098	0.367554	2.9138	0.00457443	0.043705	0.240314	0.303062	0.0627488	No	No	No
HOXC11	cg22709192	0.454005	0.15588	2.91252	0.00459146	0.0438312	0.383902	0.540059	0.156157	Yes	Yes	Yes
NMUR1	cg00143376	0.930985	0.31969	2.91215	0.00459646	0.0438606	0.420927	0.498454	0.0775268	No	No	No
HOXC5	cg00187380	0.794116	0.272741	2.91161	0.00460366	0.0438747	0.10274	0.142948	0.0402074	Yes	Yes	Yes
PALM2-AKAP2	cg10994430	1.847	0.634294	2.91189	0.00459989	0.0438747	0.0789898	0.107891	0.0289012	No	No	No
FXYD2	cg25894551	0.874475	0.300331	2.9117	0.00460243	0.0438747	0.65281	0.739774	0.0869636	No	No	No
PLEKHA4	cg08077345	1.10842	0.380944	2.90966	0.00462979	0.0440871	0.423392	0.524068	0.100675	No	No	No
PCDHB14	cg06327515	0.613993	0.211071	2.90893	0.00463954	0.0441433	0.210322	0.379789	0.169468	NA	NA	NA
PLA2R1	cg24235037	1.35338	0.465405	2.90795	0.00465277	0.0442326	0.0931444	0.149512	0.0563679	No	No	No
CACNG6	cg04080057	0.758438	0.260851	2.90755	0.00465817	0.0442655	0.373996	0.514301	0.140304	No	No	No
EGLN1	cg16855929	1.03554	0.356209	2.9071	0.0046643	0.0443055	0.385934	0.474902	0.0889683	No	No	No
LYPD2	cg18493182	0.685132	0.235754	2.90613	0.0046774	0.0444115	0.562849	0.709805	0.146956	No	No	No
PAX9	cg00509670	0.564847	0.194417	2.90534	0.00468821	0.0444774	0.203874	0.397291	0.193418	Yes	Yes	Yes
DAND5	cg15177917	1.28952	0.444053	2.90399	0.00470656	0.0445962	0.128641	0.192253	0.0636119	No	No	No
CIDEA	cg19883905	0.592172	0.203951	2.9035	0.00471324	0.044641	0.0910992	0.285052	0.193953	Yes	Yes	Yes
LOC124751	cg14069619	1.28087	0.441204	2.90312	0.00471844	0.0446719	0.386117	0.443677	0.0575603	No	No	No
EFNB1	cg23545272	0.85939	0.296203	2.90135	0.00474265	0.044864	0.553345	0.614807	0.0614622	Yes	No	No
PIM2	cg18653991	1.5721	0.542177	2.89961	0.00476668	0.0450543	0.280371	0.339191	0.0588209	No	No	No
C20orf39	cg16098981	0.70574	0.243526	2.89801	0.00478879	0.0452074	0.059061	0.150266	0.0912047	No	No	No
CAMK2N1	cg08398233	1.02679	0.354445	2.8969	0.00480423	0.0453163	0.100661	0.171166	0.0705047	Yes	Yes	Yes
DMRT3	cg26489108	1.00166	0.34577	2.89689	0.00480428	0.0453163	0.346722	0.510906	0.164184	Yes	Yes	Yes
WNT2	cg15647515	0.828081	0.285909	2.89631	0.00481238	0.0453741	0.054146	0.126718	0.0725723	Yes	Yes	Yes
PRKCB1	cg24250393	0.523414	0.180768	2.89551	0.00482358	0.045461	0.160207	0.370137	0.20993	No	Yes	Yes
HIST1H3J	cg17718302	0.458663	0.158574	2.89242	0.00486677	0.0457885	0.0844234	0.333553	0.24913	No	Yes	No
EDNRB	cg23316360	0.421371	0.145694	2.89217	0.00487029	0.0457885	0.0957203	0.345966	0.250246	No	No	No
PRKCG	cg26626089	0.721648	0.249517	2.89218	0.0048702	0.0457885	0.162778	0.293265	0.130488	No	No	No
FLJ30313	cg27447740	0.555609	0.192073	2.8927	0.00486287	0.0457885	0.078706	0.250565	0.171859	No	No	No
CHRNA10	cg26158980	4.35186	1.50515	2.89132	0.00488234	0.0458642	0.912484	0.931841	0.0193565	No	No	No
CNTN4	cg11563860	0.720215	0.249113	2.89111	0.00488524	0.0458727	0.225833	0.324884	0.0990508	No	No	No
PCDHB12	cg12343638	0.833767	0.288422	2.89079	0.00488977	0.0458965	0.195559	0.377984	0.182425	NA	NA	NA
COL15A1	cg19461644	0.58286	0.201644	2.89054	0.00489341	0.0459119	0.0759062	0.181791	0.105885	NA	NA	NA
TXNL2	cg24582500	2.06987	0.716146	2.89029	0.00489691	0.0459259	0.0765035	0.102588	0.0260848	No	No	No
TNXB	cg13823701	0.750324	0.259668	2.88955	0.00490729	0.0459742	0.226509	0.338478	0.11197	No	No	No
SPON1	cg02994974	0.466073	0.161363	2.88836	0.00492426	0.0460562	0.0405854	0.171979	0.131394	Yes	Yes	Yes
TNS1	cg18328334	0.641095	0.22204	2.88729	0.00493945	0.0461741	0.21495	0.386888	0.171938	No	No	No
TRAPPC1	cg01837574	0.775392	0.268643	2.88633	0.00495318	0.0462835	0.208892	0.288467	0.0795749	NA	NA	NA
SLC2A3	cg20972214	0.616215	0.213531	2.88583	0.00496033	0.0463315	0.201196	0.406964	0.205768	No	No	No
OLIG3	cg03889226	0.574628	0.199161	2.88525	0.00496873	0.0463783	0.127641	0.328329	0.200688	No	Yes	Yes
TRO	cg06942445	0.586649	0.20333	2.8852	0.00496938	0.0463783	0.301443	0.424583	0.12314	No	No	No
PTPRO	cg06357925	0.488113	0.169189	2.88501	0.00497211	0.0463849	0.0845067	0.294423	0.209916	No	No	No
OGN	cg13580728	1.34142	0.465046	2.88449	0.00497958	0.0464357	0.423939	0.503411	0.0794721	NA	NA	NA
TSCOT	cg10726357	1.1473	0.397776	2.88427	0.00498268	0.0464457	0.45263	0.54221	0.0895802	Yes	No	No
CCK	cg03724463	0.579687	0.201008	2.8839	0.00498805	0.0464581	0.180668	0.343462	0.162794	NA	NA	NA
ADAMTSL3	cg11611600	0.458112	0.158847	2.88399	0.00498677	0.0464581	0.125694	0.289053	0.163359	Yes	No	No
SLC39A7	cg10940418	0.901843	0.312824	2.88291	0.00500233	0.0465533	0.27292	0.352797	0.0798768	No	No	No
KCNMB2	cg08812936	0.965286	0.334932	2.88204	0.00501489	0.0466513	0.309581	0.365181	0.0556003	No	No	No
EDNRB	cg03086857	0.713892	0.247861	2.88021	0.00504139	0.0468598	0.105723	0.210466	0.104742	No	No	No
MSC	cg06269753	0.611575	0.212386	2.87954	0.00505117	0.0469128	0.214428	0.421618	0.20719	Yes	Yes	Yes
NR2F6	cg16749578	1.82693	0.634588	2.87893	0.00506008	0.0469575	0.0654464	0.111258	0.0458113	No	No	No
PAX7	cg11428724	0.475859	0.165329	2.87825	0.00506997	0.0470303	0.0735559	0.224141	0.150585	Yes	Yes	Yes
FBLN5	cg14974772	1.68238	0.58479	2.87689	0.00508989	0.047196	0.124433	0.157523	0.0330902	No	No	Yes
WNT6	cg22156632	1.15223	0.40059	2.87634	0.00509795	0.0472326	0.103102	0.174128	0.0710262	Yes	Yes	Yes
ENSA	cg26087862	1.51557	0.527071	2.87546	0.00511094	0.0473338	0.241669	0.291555	0.0498856	No	No	No
CDH1	cg24765079	0.592278	0.206073	2.87412	0.0051307	0.0474977	0.129963	0.249913	0.11995	No	No	No
RAB31	cg17982102	0.657888	0.228942	2.8736	0.00513827	0.0475295	0.1942	0.308715	0.114515	Yes	No	No
ESX1	cg09261015	0.789406	0.275024	2.87032	0.00518709	0.0479038	0.441388	0.554905	0.113517	Yes	Yes	Yes
SOCS2	cg22125370	0.683628	0.238293	2.86885	0.00520896	0.0480671	0.218009	0.470997	0.252988	No	No	No
BZRAP1	cg12937434	1.03601	0.361212	2.86816	0.00521941	0.0480863	0.306278	0.427423	0.121145	No	No	No
CHRNA5	cg22563815	0.839765	0.292773	2.86831	0.00521708	0.0480863	0.360003	0.469351	0.109348	No	No	No
CART	cg23300372	0.533855	0.186144	2.86796	0.00522235	0.048094	0.0709141	0.192582	0.121668	No	No	No
PCDH9	cg25422943	0.368932	0.128743	2.86565	0.00525714	0.0483175	0.0435667	0.236999	0.193433	No	No	No
NR2F2	cg04943986	2.59543	0.905998	2.86472	0.00527119	0.0484272	0.049961	0.0697231	0.019762	Yes	Yes	Yes
FOLR1	cg03699566	0.739542	0.258324	2.86285	0.00529955	0.0486684	0.314822	0.391836	0.0770139	No	No	No
L3MBTL4	cg17688525	0.979158	0.342325	2.86032	0.00533821	0.0489451	0.0500203	0.122536	0.0725161	No	No	No
ABCC8	cg11981631	0.635429	0.222177	2.86001	0.00534296	0.048969	0.056984	0.146949	0.0899645	Yes	Yes	Yes
FLJ21820	cg09109450	0.479792	0.167771	2.8598	0.00534614	0.0489786	0.0859732	0.315949	0.229976	No	No	No
CALCA	cg06295856	0.456561	0.159758	2.85783	0.00537644	0.0491778	0.103222	0.272407	0.169185	Yes	Yes	Yes
LYL1	cg15013019	0.537877	0.188195	2.85809	0.00537252	0.0491778	0.1724	0.424931	0.25253	No	No	No
C10orf33	cg08397758	2.06462	0.722536	2.85746	0.00538216	0.0492105	0.0825127	0.116586	0.0340734	No	No	No
FOXE1	cg15802898	0.407191	0.142516	2.85716	0.00538682	0.0492334	0.0703698	0.328622	0.258252	Yes	Yes	Yes
PSORS1C2	cg22458065	2.05469	0.719226	2.85681	0.00539222	0.0492632	0.770978	0.819685	0.0487079	No	No	No
NPY5R	cg13975625	0.506411	0.177277	2.85662	0.00539522	0.049271	0.0877551	0.307381	0.219626	Yes	No	Yes
MMP14	cg10599444	1.00516	0.351906	2.85634	0.00539944	0.0492839	0.126484	0.198947	0.0724638	No	No	No
GSTP1	cg22224704	0.799005	0.279739	2.85625	0.00540092	0.0492839	0.0591546	0.156446	0.0972917	No	No	No
TRIM58	cg20855565	0.428966	0.15024	2.85521	0.00541701	0.0493522	0.0705723	0.296629	0.226057	No	No	No
ADAMTS14	cg02503850	1.60529	0.562313	2.85479	0.00542347	0.0493914	0.0447181	0.0949817	0.0502636	No	No	No
OGFR	cg21387281	1.38768	0.486147	2.85444	0.00542892	0.0494215	0.611242	0.712755	0.101513	No	No	No
LARP5	cg10789261	1.12446	0.394075	2.85342	0.00544484	0.0495271	0.485358	0.557572	0.0722142	No	No	No
NDUFA1	cg14541939	1.10567	0.387599	2.85261	0.00545748	0.0496225	0.452727	0.535616	0.0828882	No	No	No
LLGL2	cg20366832	1.51908	0.533026	2.84991	0.00549978	0.049928	0.257044	0.295781	0.038737	No	No	No
UBQLN2	cg02492740	0.773391	0.271592	2.84762	0.00553598	0.050221	0.355165	0.44983	0.0946645	No	No	No
PCDHB3	cg03504078	1.37962	0.484536	2.8473	0.00554108	0.050221	0.356392	0.411425	0.0550336	No	No	No
ALX4	cg11797994	0.823248	0.289119	2.84744	0.00553886	0.050221	0.268185	0.436509	0.168325	Yes	Yes	Yes
FAM50A	cg12219915	0.814907	0.286215	2.84718	0.005543	0.050221	0.437497	0.548248	0.11075	NA	NA	NA
TSGA14	cg13975369	0.625994	0.219976	2.84574	0.00556583	0.0503941	0.14722	0.202492	0.0552721	No	No	No
ATP7A	cg21142188	0.92729	0.325856	2.8457	0.00556649	0.0503941	0.432896	0.514783	0.0818867	No	No	No
CECR6	cg12373771	1.6786	0.590209	2.84408	0.00559228	0.0505724	0.0614248	0.103902	0.0424771	No	No	No
GNL3L	cg26822601	0.941034	0.330878	2.84405	0.0055928	0.0505724	0.347635	0.411915	0.0642797	No	No	No
ZNF681	cg11262874	1.08767	0.382556	2.84316	0.00560714	0.0506822	0.215849	0.309607	0.093758	NA	NA	NA
BMP2	cg01797527	0.894163	0.314556	2.84262	0.00561571	0.0507397	0.0396322	0.0930119	0.0533797	No	No	No
FXYD7	cg22392666	0.696528	0.245074	2.84212	0.00562383	0.050773	0.0903448	0.18768	0.0973352	No	No	Yes
CYP8B1	cg21979032	0.770618	0.271256	2.84092	0.00564306	0.0508667	0.594376	0.722736	0.12836	No	No	No
CHI3L1	cg07423149	0.57334	0.201922	2.83941	0.00566749	0.0510668	0.205067	0.308835	0.103768	No	No	No
MARVELD1	cg25355803	1.05965	0.373268	2.83883	0.0056768	0.0510797	0.422274	0.539296	0.117021	No	No	No
EGFL6	cg00932276	0.767183	0.270323	2.83803	0.00568991	0.0511484	0.388205	0.50307	0.114866	Yes	Yes	Yes
MMP24	cg07085271	1.16963	0.412157	2.83783	0.00569304	0.0511565	0.349138	0.442678	0.0935395	No	No	No
FLJ22688	cg10971790	0.893978	0.315096	2.83716	0.00570396	0.0511945	0.0365339	0.0931543	0.0566204	No	Yes	No
SLC25A34	cg16713727	0.724841	0.255648	2.8353	0.00573426	0.0514061	0.580825	0.648528	0.0677024	No	No	No
F2	cg20199333	1.10168	0.388652	2.83463	0.00574536	0.0514856	0.695908	0.768027	0.0721186	No	No	No
ZFP3	cg04862249	0.493293	0.174035	2.83445	0.00574828	0.0514916	0.0875577	0.273862	0.186304	No	No	No
CD248	cg00350296	0.646681	0.228196	2.83388	0.00575763	0.0515553	0.176784	0.342828	0.166044	No	No	No
CRAMP1L	cg06810647	1.10251	0.389561	2.83013	0.00581953	0.0519727	0.079392	0.164389	0.0849966	No	No	No
FNDC5	cg25870263	0.811212	0.286663	2.82985	0.00582412	0.0519884	0.38333	0.547144	0.163814	No	No	Yes
C9orf45	cg21489873	1.7459	0.617159	2.82893	0.00583932	0.0521039	0.831839	0.870631	0.0387918	No	No	No
KCNQ4	cg06885782	0.872433	0.308423	2.82869	0.00584336	0.0521197	0.203564	0.319529	0.115966	No	No	No
DNALI1	cg21488617	0.676061	0.239125	2.82723	0.00586781	0.0522971	0.144363	0.312979	0.168616	No	No	No
PTPRO	cg27196745	0.472352	0.167084	2.82704	0.00587096	0.0523049	0.0781252	0.303235	0.22511	No	No	No
ARL14	cg24147596	1.11562	0.394781	2.82592	0.00588962	0.0524305	0.568573	0.6645	0.0959274	No	No	No
NDP	cg11614809	1.13247	0.400793	2.82558	0.00589543	0.0524618	0.285467	0.327283	0.0418168	Yes	No	No
NRIP2	cg05194726	0.729976	0.258398	2.82501	0.00590502	0.0525267	0.17854	0.287811	0.109271	No	No	No
FLJ36070	cg15475323	0.771258	0.273114	2.82394	0.0059229	0.0526654	0.227554	0.304195	0.0766411	NA	NA	NA
RAB39B	cg00547789	0.883365	0.312893	2.82322	0.00593514	0.0527538	0.245859	0.350016	0.104157	No	No	No
ADIPOQ	cg03573747	0.911058	0.322725	2.82302	0.00593848	0.0527631	0.485185	0.596686	0.1115	No	No	No
ZNF354C	cg04488521	0.436779	0.154773	2.82207	0.00595451	0.0528851	0.0578083	0.227311	0.169502	No	No	No
CELSR3	cg06621358	0.841171	0.298192	2.8209	0.00597433	0.0530201	0.123523	0.209623	0.0861004	No	No	No
ACTA1	cg20025656	0.570396	0.202308	2.81944	0.00599928	0.0532209	0.1193	0.250749	0.131449	No	No	No
EPHA8	cg11847808	1.51158	0.536543	2.81726	0.00603655	0.0534723	0.138118	0.177156	0.0390382	No	No	No
FGF10	cg14654926	0.553967	0.196635	2.81723	0.00603694	0.0534723	0.0648902	0.226605	0.161714	No	Yes	No
SLC5A8	cg16178491	0.749284	0.265964	2.81723	0.00603693	0.0534723	0.0797075	0.22097	0.141262	No	No	No
HCN1	cg06498267	0.473042	0.167952	2.81653	0.00604906	0.053539	0.130966	0.306405	0.175439	No	No	No
PLS3	cg16221059	0.675645	0.239886	2.81652	0.00604913	0.053539	0.108756	0.302675	0.193919	Yes	No	No
WDR69	cg21577049	0.589115	0.209324	2.81437	0.0060862	0.0538256	0.41036	0.637946	0.227585	No	No	No
KAL1	cg04553232	1.00691	0.357932	2.81314	0.00610743	0.0539597	0.154637	0.219945	0.0653081	Yes	Yes	No
CHST8	cg13959523	2.24152	0.796933	2.81268	0.00611547	0.0539597	0.0587926	0.0798437	0.0210511	Yes	Yes	Yes
CALCA	cg22183706	0.836299	0.297295	2.81303	0.00610945	0.0539597	0.209928	0.2907	0.0807727	Yes	Yes	Yes
SPAG16	cg24664861	0.606369	0.215583	2.8127	0.00611516	0.0539597	0.120762	0.216705	0.095943	No	No	No
ESRRA	cg23073111	1.45481	0.51726	2.81254	0.00611796	0.053961	0.160868	0.214275	0.0534074	NA	NA	NA
WDR58	cg24652919	0.933764	0.332041	2.8122	0.00612384	0.0539921	0.329084	0.433994	0.10491	No	No	No
ACVR1	cg16682903	1.39675	0.496731	2.81188	0.00612942	0.0540125	0.303275	0.363288	0.0600134	No	No	No
FLJ10260	cg19566405	1.03251	0.367226	2.81166	0.00613321	0.0540125	0.27964	0.307893	0.0282538	NA	NA	NA
VMP	cg12457773	1.22034	0.434074	2.81137	0.00613829	0.0540365	0.0741459	0.123827	0.0496814	No	No	No
NPY2R	cg27504805	0.509422	0.181237	2.8108	0.00614819	0.0540822	0.10546	0.284178	0.178718	NA	NA	NA
PTGES2	cg24730207	2.94127	1.04656	2.81042	0.00615478	0.0540987	0.855778	0.892158	0.0363796	No	No	No
EMP2	cg00451635	1.19488	0.425368	2.80905	0.00617871	0.0542882	0.0989426	0.154911	0.0559688	No	No	No
GSTM2	cg16670497	0.472294	0.168169	2.80845	0.00618931	0.0543606	0.0821235	0.256644	0.174521	No	No	No
HIST1H2BE	cg21146268	0.723378	0.257676	2.80732	0.00620924	0.0544523	0.190478	0.314904	0.124426	No	No	No
PAQR9	cg00970325	0.621632	0.221453	2.80706	0.00621371	0.0544707	0.209535	0.308736	0.0992009	No	No	No
PPP1R3C	cg21017752	0.462373	0.164731	2.80684	0.00621767	0.0544846	0.0718137	0.198676	0.126862	No	No	No
CYHR1	cg04794268	0.948413	0.338156	2.80466	0.00625619	0.0547594	0.16847	0.238524	0.0700546	No	No	No
ANKMY1	cg08321346	1.01651	0.362505	2.80413	0.0062655	0.0547782	0.0947743	0.165909	0.0711343	No	No	No
TDRD5	cg09656934	0.774365	0.27613	2.80435	0.00626161	0.0547782	0.377804	0.578423	0.200619	No	No	No
B3GALT7	cg20557104	0.663679	0.236668	2.80426	0.0062632	0.0547782	0.142558	0.241626	0.0990679	No	No	No
PARVA	cg26320696	1.82197	0.649934	2.80332	0.0062799	0.0548833	0.048935	0.0845105	0.0355755	No	No	No
RPL36A	cg18507125	0.953296	0.340234	2.80188	0.00630549	0.055044	0.606486	0.657918	0.0514318	No	No	No
AOX1	cg02144933	0.358246	0.127905	2.80087	0.00632361	0.0550586	0.0387574	0.263701	0.224944	No	No	No
SLC25A10	cg07845392	0.651402	0.232528	2.80139	0.00631426	0.0550586	0.205607	0.285939	0.080332	No	No	No
SIM1	cg11540692	0.808516	0.288647	2.80105	0.00632033	0.0550586	0.323914	0.483424	0.15951	No	Yes	Yes
PLA2G1B	cg18133966	1.05199	0.375597	2.80085	0.00632392	0.0550586	0.234556	0.321234	0.0866772	No	No	No
C15orf48	cg08278554	0.671173	0.239668	2.80042	0.00633161	0.0551045	0.23921	0.372655	0.133445	No	No	No
BCL9L	cg11507178	1.11989	0.400006	2.79969	0.00634478	0.0551665	0.0759305	0.126773	0.0508422	No	No	No
ZNF354C	cg11538128	0.646998	0.231113	2.79949	0.00634835	0.0551665	0.0597999	0.160626	0.100826	No	No	No
RNF2	cg11320084	1.64296	0.587026	2.79879	0.00636099	0.0552555	0.0819042	0.12197	0.0400654	No	No	Yes
GRM1	cg13722123	0.62732	0.224248	2.79744	0.00638525	0.0554033	0.140715	0.310262	0.169548	No	No	No
KCNK4	cg01352108	0.78782	0.281661	2.79705	0.00639231	0.0554226	0.120761	0.199338	0.0785771	Yes	Yes	Yes
HYAL2	cg00840516	0.639699	0.228764	2.79633	0.00640526	0.055514	0.468509	0.614949	0.14644	No	No	No
BRWD3	cg03164831	0.742234	0.265526	2.79533	0.00642341	0.0556503	0.335326	0.453552	0.118225	No	No	No
AQP1	cg20176648	0.761009	0.272379	2.79394	0.0064488	0.0558095	0.196435	0.341875	0.14544	No	No	No
EIF5A2	cg26209058	0.441606	0.15806	2.79392	0.00644909	0.0558095	0.0710217	0.226264	0.155243	No	No	No
CSMD2	cg05382123	0.553194	0.198091	2.79263	0.00647261	0.0559308	0.0665937	0.195839	0.129245	No	No	Yes
MTNR1B	cg15842276	0.637688	0.228338	2.79273	0.0064708	0.0559308	0.418454	0.609695	0.191242	No	No	No
CNTN2	cg17860158	1.80018	0.644619	2.79262	0.00647285	0.0559308	0.107932	0.140057	0.032125	No	No	Yes
GNAS	cg06324048	0.856584	0.306818	2.79184	0.00648716	0.0560179	0.392503	0.519495	0.126992	Yes	No	No
ZNF502	cg08210616	0.728266	0.260876	2.79162	0.0064912	0.0560179	0.188715	0.321839	0.133124	No	No	No
GRIA1	cg08578734	0.788931	0.282626	2.79143	0.00649464	0.0560179	0.217455	0.327104	0.109649	No	No	No
CKMT2	cg10978355	0.654748	0.234559	2.7914	0.00649512	0.0560179	0.119403	0.254232	0.134828	No	No	No
LHX5	cg23922454	0.594195	0.212866	2.79141	0.00649502	0.0560179	0.117238	0.304124	0.186886	Yes	Yes	Yes
C20orf42	cg09539538	0.88804	0.318258	2.79031	0.00651514	0.0561694	0.379413	0.493921	0.114508	No	No	No
WNT4	cg07180649	2.2799	0.817189	2.78993	0.00652218	0.056188	0.102933	0.141348	0.0384146	No	No	No
CUL7	cg18159180	0.71662	0.256849	2.79005	0.00651995	0.056188	0.347954	0.452039	0.104084	No	No	No
CIDEB	cg15364618	0.604726	0.216856	2.78861	0.0065465	0.056334	0.454324	0.605055	0.150731	No	No	No
FLNA	cg06758848	1.31594	0.472541	2.78482	0.00661686	0.0567819	0.397184	0.445259	0.0480758	No	No	No
IGF2AS	cg17773950	0.695008	0.249542	2.78513	0.00661105	0.0567819	0.0798415	0.212728	0.132887	Yes	Yes	Yes
HNT	cg11965370	0.403902	0.145055	2.78448	0.00662322	0.0568026	0.253894	0.481403	0.227508	NA	NA	NA
HOXA9	cg25047280	0.540635	0.194216	2.78368	0.00663817	0.0569095	0.188956	0.403835	0.214879	No	Yes	Yes
GRB2	cg04156850	2.31568	0.831979	2.78334	0.00664453	0.0569428	0.0850986	0.109236	0.0241372	No	No	No
CORIN	cg26018901	0.722609	0.259842	2.78096	0.0066892	0.0572615	0.0915191	0.183911	0.0923922	No	No	No
JMJD4	cg11520395	1.0432	0.375172	2.78058	0.00669637	0.0572818	0.332726	0.407999	0.0752726	No	No	No
FLI1	cg13755070	0.784027	0.281966	2.78057	0.00669656	0.0572818	0.164223	0.256011	0.0917873	Yes	Yes	Yes
RAC3	cg03000846	0.668702	0.240539	2.78001	0.00670703	0.05735	0.347389	0.430903	0.0835146	No	No	No
SSTR4	cg10019507	1.01191	0.364175	2.77863	0.00673312	0.0575239	0.547864	0.655946	0.108082	No	No	No
GNL3L	cg10318351	1.29768	0.467035	2.77854	0.00673488	0.0575239	0.342608	0.388717	0.046109	No	No	No
FLJ27365	cg04329382	0.679462	0.244739	2.77627	0.00677809	0.0578499	0.164201	0.27492	0.11072	No	No	No
GSTM5	cg04987894	0.643021	0.231639	2.77596	0.00678402	0.057879	0.359458	0.518887	0.159429	No	No	No
VMD2L2	cg04609640	1.16786	0.420873	2.77485	0.00680518	0.0580086	0.358538	0.42339	0.0648524	No	No	No
MAL	cg21245652	0.785225	0.282988	2.77477	0.00680679	0.0580086	0.211274	0.325882	0.114607	Yes	Yes	Yes
KNS2	cg23090046	0.911506	0.32855	2.77433	0.00681508	0.0580557	0.161139	0.278221	0.117083	No	No	No
FLJ22746	cg24516901	0.64719	0.233288	2.77421	0.00681737	0.0580557	0.149845	0.264989	0.115143	No	No	No
C10orf72	cg08427977	0.783366	0.282427	2.7737	0.00682729	0.0580755	0.291675	0.395871	0.104196	No	Yes	No
FGF7	cg23504246	0.9024	0.325342	2.7737	0.00682728	0.0580755	0.237532	0.302932	0.0654004	No	No	No
SLC6A15	cg03064067	0.613428	0.221207	2.77309	0.00683888	0.0581525	0.252796	0.410524	0.157728	No	No	No
SUSD2	cg03599338	1.00006	0.360764	2.77205	0.00685891	0.0582072	0.400988	0.454351	0.0533635	No	No	No
RASGRF1	cg16154416	0.755276	0.272436	2.7723	0.00685407	0.0582072	0.0817095	0.198881	0.117172	Yes	Yes	Yes
KIAA0196	cg27089714	1.0972	0.395775	2.77228	0.00685449	0.0582072	0.302137	0.392374	0.0902373	No	No	No
ZIC3	cg13613682	1.30939	0.472423	2.77164	0.00686689	0.0582397	0.577935	0.674037	0.0961019	No	No	No
CHFR	cg17387870	0.825751	0.298023	2.77077	0.00688375	0.0583612	0.202269	0.260838	0.058569	No	No	No
MAGED1	cg17991347	0.994977	0.359309	2.76914	0.00691521	0.0585846	0.246476	0.35257	0.106094	No	No	No
PNMA3	cg05376895	0.84843	0.306525	2.7679	0.00693945	0.0586922	0.478223	0.558949	0.0807264	NA	NA	NA
EBF3	cg06139836	1.24222	0.448805	2.76783	0.00694069	0.0586922	0.0877795	0.137478	0.0496983	Yes	No	Yes
MARK4	cg15642326	2.87041	1.03699	2.76801	0.00693721	0.0586922	0.0550071	0.0697063	0.0146991	No	No	No
PLEKHA6	cg21581873	0.729222	0.263456	2.76791	0.00693925	0.0586922	0.175432	0.328561	0.153129	No	No	No
NGFRAP1	cg05782975	1.2742	0.460486	2.76707	0.00695557	0.0587963	0.576237	0.633091	0.056854	No	No	No
FLJ13946	cg02549910	0.602107	0.217661	2.76626	0.00697149	0.0588876	0.0754675	0.129025	0.0535579	No	No	No
STK31	cg25612145	2.44553	0.884027	2.76636	0.00696951	0.0588876	0.853922	0.899155	0.0452333	No	No	No
MAGEE1	cg12431196	0.961839	0.347798	2.76551	0.00698608	0.0589457	0.377743	0.477083	0.0993403	No	No	No
BMP3	cg01049530	0.367561	0.13292	2.76529	0.00699044	0.0589609	0.0861333	0.303326	0.217193	Yes	Yes	No
GABRA4	cg03593419	0.555588	0.200963	2.76463	0.00700342	0.0590486	0.0392031	0.216727	0.177524	Yes	Yes	Yes
C11orf44	cg13125510	0.88308	0.319591	2.76315	0.00703244	0.0592063	0.452429	0.576671	0.124243	No	No	No
DAPK3	cg03752885	0.969188	0.350795	2.76283	0.00703878	0.059238	0.291477	0.41931	0.127833	NA	NA	NA
RALGPS2	cg10559803	0.753763	0.272877	2.76228	0.00704959	0.0593072	0.274111	0.371348	0.0972366	No	No	No
ST8SIA1	cg24723331	0.550586	0.199391	2.76134	0.00706827	0.0594426	0.0646352	0.223207	0.158572	Yes	Yes	No
GLUD2	cg11174654	1.16052	0.420568	2.75941	0.00710653	0.0597425	0.225279	0.303314	0.0780357	No	No	No
PRAP1	cg10742801	0.679697	0.246352	2.75905	0.00711377	0.0597636	0.113159	0.262517	0.149358	No	No	No
TSPAN8	cg15684563	1.45499	0.527355	2.75903	0.00711425	0.0597636	0.275323	0.316854	0.0415308	No	No	No
FAM19A2	cg15736338	1.49919	0.543457	2.75861	0.00712249	0.0597891	0.11844	0.138785	0.0203449	No	No	No
MLF1	cg20182358	0.413155	0.149808	2.7579	0.00713673	0.0598729	0.086216	0.329897	0.243681	No	No	No
STK24	cg10057295	1.46228	0.530354	2.75718	0.00715111	0.0599417	0.0640285	0.116639	0.0526106	No	No	No
CALCR	cg23239396	0.64164	0.23271	2.75725	0.0071497	0.0599417	0.105093	0.226625	0.121532	No	Yes	Yes
Gcom1	cg00509616	2.16752	0.786329	2.7565	0.0071647	0.0600336	0.0563647	0.0882627	0.031898	No	No	No
ERO1L	cg08554114	1.48213	0.537803	2.7559	0.00717673	0.0601126	0.549467	0.633984	0.0845173	No	No	No
DDX31	cg10676060	1.36569	0.495605	2.75559	0.00718304	0.0601215	0.108982	0.162439	0.0534576	No	No	No
GIPC1	cg14528319	0.762914	0.276909	2.75511	0.00719276	0.0601809	0.270788	0.353288	0.0824994	No	No	No
DPYSL5	cg26195812	0.389709	0.141552	2.75311	0.00723309	0.0604964	0.0900214	0.264264	0.174242	Yes	No	Yes
SCNN1D	cg22421766	1.73604	0.630612	2.75294	0.00723642	0.0605021	0.0537025	0.0984484	0.0447459	No	No	No
HOM-TES-103	cg01493517	0.844041	0.306643	2.75252	0.00724496	0.0605515	0.45965	0.639375	0.179726	NA	NA	NA
CORIN	cg02553486	0.729102	0.264926	2.7521	0.00725349	0.0606007	0.212915	0.332933	0.120017	No	No	No
APC	cg16970232	0.488657	0.17758	2.75177	0.00726029	0.0606354	0.186698	0.272088	0.0853905	No	No	No
ME1	cg06836736	0.567209	0.206176	2.75109	0.00727401	0.0606975	0.0976796	0.251359	0.15368	No	No	No
MAMDC4	cg15619125	1.53058	0.556372	2.75101	0.00727565	0.0606975	0.641353	0.71282	0.0714673	No	No	No
CALCA	cg14348532	0.568201	0.206662	2.74942	0.00730806	0.0609458	0.165481	0.278536	0.113056	Yes	Yes	Yes
LHX1	cg07747970	0.918868	0.334289	2.74872	0.00732229	0.0610422	0.115203	0.190589	0.0753855	No	No	No
CNTNAP2	cg07028533	0.533448	0.194136	2.7478	0.00734115	0.0611773	0.0965303	0.217029	0.120499	No	No	No
LOC63928	cg15309006	0.994192	0.36207	2.74586	0.0073812	0.0614887	0.0256773	0.104438	0.0787607	No	No	No
ZNF574	cg11584690	0.607296	0.221235	2.74503	0.00739833	0.061563	0.275609	0.493179	0.21757	No	No	No
ELMO3	cg19514469	0.709927	0.258635	2.7449	0.00740085	0.061563	0.347841	0.454514	0.106673	No	No	No
TMPRSS6	cg21271753	0.763309	0.278066	2.74506	0.00739753	0.061563	0.124812	0.215639	0.090827	No	No	No
DNM3	cg01017147	0.468029	0.170581	2.74374	0.00742492	0.0616712	0.263566	0.430086	0.16652	No	No	No
C1orf54	cg16501235	0.925228	0.337204	2.74382	0.00742328	0.0616712	0.455601	0.582981	0.12738	No	No	No
SGCD	cg03811411	0.889001	0.32406	2.74332	0.00743354	0.0616785	0.561758	0.670893	0.109135	No	No	No
LDHC	cg08418111	0.680773	0.248196	2.74288	0.00744276	0.0617327	0.304709	0.440903	0.136195	No	No	No
FRMPD4	cg07177300	0.566561	0.206585	2.7425	0.00745058	0.0617752	0.160371	0.274325	0.113953	Yes	Yes	Yes
SLC22A17	cg19573166	1.25957	0.459367	2.74197	0.00746173	0.0618454	0.203553	0.261578	0.058025	No	No	No
HBEGF	cg01599709	1.33889	0.488531	2.74065	0.00748921	0.0620137	0.103018	0.150888	0.0478701	No	No	No
APXL	cg09665351	1.33179	0.485948	2.74061	0.00749014	0.0620137	0.27332	0.324347	0.0510263	No	No	No
LRFN5	cg13526007	0.978349	0.357112	2.73962	0.00751082	0.0621397	0.162393	0.207913	0.0455195	Yes	Yes	Yes
CCND2	cg17580045	0.571654	0.208672	2.73949	0.00751348	0.0621397	0.202951	0.374638	0.171687	No	No	No
SYNPO	cg13590277	0.879055	0.321044	2.73811	0.0075424	0.0623026	0.181818	0.294152	0.112334	NA	NA	NA
RUNX1	cg19836199	1.52652	0.557517	2.73807	0.00754326	0.0623026	0.287943	0.337804	0.0498613	NA	NA	NA
EFNB1	cg10950297	1.0148	0.370715	2.73742	0.00755696	0.0623705	0.444422	0.523578	0.0791557	Yes	No	No
IL1RAPL2	cg23384620	0.931854	0.340418	2.73739	0.00755769	0.0623705	0.186231	0.283414	0.0971827	Yes	Yes	Yes
APS	cg05253159	0.871085	0.318302	2.73666	0.00757287	0.0624517	0.309589	0.410677	0.101088	NA	NA	NA
DRD2	cg12758687	0.711428	0.259962	2.73666	0.00757297	0.0624517	0.145046	0.331423	0.186377	No	No	No
ADARB1	cg09676390	0.911548	0.333129	2.73632	0.00758019	0.0624888	0.439083	0.531721	0.0926379	No	No	No
C2	cg04498679	0.873946	0.319657	2.73401	0.00762915	0.0627347	0.216697	0.308978	0.0922813	No	No	No
GNG4	cg09649610	0.477931	0.17477	2.73463	0.007616	0.0627347	0.296897	0.478858	0.181961	No	No	No
ZNF43	cg13858139	0.947462	0.346489	2.73447	0.0076194	0.0627347	0.160995	0.278473	0.117478	NA	NA	NA
FLJ20273	cg15967525	1.03115	0.377135	2.73417	0.00762572	0.0627347	0.230743	0.332667	0.101924	No	No	No
C12orf40	cg22941086	0.915704	0.334923	2.73407	0.00762773	0.0627347	0.567092	0.694459	0.127367	No	No	No
APC	cg24332422	0.516677	0.188995	2.73381	0.00763334	0.0627467	0.0704724	0.170483	0.10001	No	No	No
PRKAR2B	cg21250978	0.691663	0.253043	2.73338	0.00764251	0.0627771	0.232609	0.334563	0.101954	No	No	No
ECE1	cg22054164	0.802789	0.293729	2.73309	0.00764853	0.0628042	0.343464	0.454085	0.110621	No	No	No
SYNGR3	cg26486663	0.776674	0.284285	2.73202	0.00767135	0.0629465	0.0635009	0.164672	0.101171	No	No	No
TDRD5	cg12277666	0.868472	0.317963	2.73136	0.00768549	0.0630175	0.0734204	0.134006	0.0605852	No	No	No
PCOLCE	cg26777475	0.592193	0.216807	2.73143	0.00768411	0.0630175	0.363198	0.559674	0.196475	NA	NA	NA
MGC2463	cg02540157	1.75359	0.642172	2.73072	0.00769931	0.063107	0.707303	0.764626	0.0573235	No	No	No
KCNIP2	cg25123470	0.392712	0.143819	2.7306	0.0077019	0.063107	0.117316	0.401015	0.283698	No	No	Yes
KCNJ14	cg19876838	1.88892	0.691823	2.73034	0.00770729	0.0631286	0.624758	0.673178	0.0484192	No	No	No
PREPL	cg03894103	1.2785	0.468294	2.73011	0.00771224	0.0631466	0.373277	0.436367	0.0630899	No	No	No
STAG2	cg16243644	1.12164	0.410883	2.72983	0.00771842	0.0631747	0.387965	0.442736	0.0547704	No	No	No
PCDH17	cg13806135	0.54255	0.198854	2.72838	0.00774943	0.0633607	0.0807561	0.19768	0.116924	Yes	Yes	Yes
PIK4CB	cg18598959	0.691606	0.253479	2.72845	0.00774802	0.0633607	0.432932	0.553123	0.120191	No	No	No
C8orf37	cg17987660	1.22694	0.449737	2.72812	0.00775502	0.0633839	0.108739	0.195071	0.086332	No	No	No
FLJ10178	cg03057808	0.777633	0.285099	2.72759	0.00776649	0.063455	0.388505	0.500414	0.111909	No	No	No
KCNK9	cg01717150	0.451573	0.165596	2.72695	0.0077804	0.0635009	0.0545781	0.207693	0.153115	No	No	No
[truncated: 349 more rows]
