# Supplementary material for: Role of DNA Methylation and Epigenetic Silencing of HAND2 in Endometrial Cancer Development
Source: PLoS Med. 2013 Nov 12;10(11):e1001551. doi: 10.1371/journal.pmed.1001551 (PMC3825654; doi:10.1371/journal.pmed.1001551)
Supplement: Table S11 — Gene Set Enrichment Analysis of those genes comprising each of the 19 top-ranked epigenetic modules. (XLS) [file pmed.1001551.s023.xls]

## Sheet: table S11
Supplementary table S11: Gene Set Enrichment Analysis (GSEA) of those genes comprising each of the 19 top ranked EpiMods. GSEA was done using a one-tailed Fisher’s exact test of the genes comprisng each of the 19 EpiMods (defined in Supplementary table S4) against the Molecular Signatures Database (MSigDB, Broad Institute, www.broadinstitute.org/gsea/msigdb). The columns label the gene list, the …
HAND2 EpiMod
Gene List	nList	nRep	fRep	nOVLAP	OR	pvalue	adjPval	Genes
TRANSFAC	1418	908	0.640339	14	16.8565	3.15557e-09	1.34585e-05	CREBL1 GATA4 GATA6 HAND1 HAND2 HEY2 HEYL HOXD13 KLF13 NFATC4 NKX2-5 PHOX2A TBX2 TBX5
BIOCARTA_NFAT_PATHWAY	54	45	0.833333	5	60.6221	9.72726e-08	0.000207434	NKX2-5 NFATC4 GATA4 HAND1 HAND2
TRANSCRIPTION_DNA_DEPENDENT	624	510	0.817308	10	13.7034	2.244e-07	0.000248253	HOXD13 HAND2 GATA6 GATA4 HAND1 TBX2 TBX5 NKX2-5 NFATC4 KLF13
RNA_BIOSYNTHETIC_PROCESS	626	512	0.817891	10	13.6449	2.32828e-07	0.000248253	HOXD13 HAND2 GATA6 GATA4 HAND1 TBX2 TBX5 NKX2-5 NFATC4 KLF13
HEART_DEVELOPMENT	36	25	0.694444	4	86.7807	4.79008e-07	0.000408594	GATA4 HAND1 HAND2 TBX5
BRUNEAU_SEPTATION_VENTRICULAR	10	7	0.7	3	314.801	5.92214e-07	0.000420966	GATA4 NKX2-5 TBX5
TRANSCRIPTION	739	600	0.811908	10	11.4627	1.02619e-06	0.000625241	HOXD13 HAND2 GATA6 GATA4 HAND1 TBX2 TBX5 NKX2-5 NFATC4 KLF13
RNA_METABOLIC_PROCESS	811	645	0.795314	10	10.5801	2.00303e-06	0.00106787	HOXD13 KLF13 HAND2 GATA6 GATA4 HAND1 TBX2 TBX5 NKX2-5 NFATC4
SYSTEM_DEVELOPMENT	855	573	0.670175	9	9.84944	7.44809e-06	0.00352957	HOXD13 PPP2R5D HEYL HAND2 GATA6 GATA4 HAND1 TBX5 HEY2
ANATOMICAL_STRUCTURE_DEVELOPMENT	1005	669	0.665672	9	8.29837	2.63893e-05	0.011255	HOXD13 PPP2R5D HEYL HAND2 GATA6 GATA4 HAND1 TBX5 HEY2
MULTICELLULAR_ORGANISMAL_DEVELOPMENT	1040	698	0.671154	9	7.91521	3.71546e-05	0.0144058	HOXD13 PPP2R5D HEYL HAND2 GATA6 GATA4 HAND1 TBX5 HEY2
ORGAN_DEVELOPMENT	567	401	0.707231	7	9.51038	5.55808e-05	0.0192951	HOXD13 HAND2 GATA6 GATA4 HAND1 TBX5 HEY2
NUCLEOBASENUCLEOSIDENUCLEOTIDE_AND_NUCLEIC_ACID_METABOLIC_PROCESS	1208	939	0.777318	10	6.91703	5.88127e-05	0.0192951	HOXD13 KLF13 HAND2 GATA6 GATA4 HAND1 TBX2 TBX5 NKX2-5 NFATC4
V$ZF5_01	183	120	0.655738	4	15.5862	0.000263614	0.0781052	KLF13 PHOX2A NFATC4 TBX2
REGULATION_OF_TRANSCRIPTIONDNA_DEPENDENT	453	366	0.807947	6	8.32606	0.000306252	0.0781052	HOXD13 GATA6 GATA4 TBX2 TBX5 NKX2-5
MARTIN_INTERACT_WITH_HDAC	10	10	1	2	101.234	0.000310115	0.0781052	CAMTA2 NKX2-5
REGULATION_OF_RNA_METABOLIC_PROCESS	458	371	0.810044	6	8.20634	0.000329635	0.0781052	HOXD13 GATA6 GATA4 TBX2 TBX5 NKX2-5
TRANSCRIPTION_FROM_RNA_POLYMERASE_II_PROMOTER	450	371	0.824444	6	8.20634	0.000329635	0.0781052	HOXD13 HAND2 HAND1 NKX2-5 NFATC4 KLF13
V$AP2_Q6	191	130	0.680628	4	14.3329	0.000358212	0.0804092	CAMTA2 GATA6 CENPB TBX2
TRANSCRIPTION_FACTOR_ACTIVITY	341	248	0.727273	5	9.75109	0.000422158	0.0900253	NKX2-5 HAND2 HAND1 HEY2 TBX5
REACTOME_UNFOLDED_PROTEIN_RESPONSE	19	14	0.736842	2	67.5347	0.000623054	0.125214	MBTPS1 MBTPS2
BIOPOLYMER_METABOLIC_PROCESS	1633	1244	0.761788	10	4.96126	0.000645885	0.125214	HOXD13 KLF13 HAND2 GATA6 GATA4 HAND1 TBX2 TBX5 NKX2-5 NFATC4
GCTNWTTGK_UNKNOWN	232	156	0.672414	4	11.8378	0.00071539	0.132658	NFATC4 KLF13 GATA6 TBX2
ACAGGGT,MIR-10A,MIR-10B	109	69	0.633028	3	19.457	0.000796372	0.141522	KLF13 GATA6 TBX5
REGULATION_OF_TRANSCRIPTION	556	449	0.807554	6	6.68603	0.000914743	0.156055	HOXD13 GATA6 GATA4 TBX2 TBX5 NKX2-5
DNA_BINDING	588	454	0.772109	6	6.60666	0.000969724	0.159072	HAND2 HAND1 TBX2 TBX5 NKX2-5 HEY2
TGGAAA_V$NFAT_Q4_01	1438	866	0.602225	8	5.04871	0.00120187	0.18985	PPP2R5D KLF13 HAND2 GATA6 HAND1 TBX2 TBX5 NFATC4
DCC EpiMod
Gene List	nList	nRep	fRep	nOVLAP	OR	pvalue	adjPval	Genes
KEGG_AXON_GUIDANCE	129	97	0.751938	5	19.6919	1.52751e-05	0.0651485	UNC5B UNC5A NTN1 DCC UNC5C
GCAAAAA,MIR-129	155	98	0.632258	4	14.6905	0.000298883	0.637368	TRIO RAB21 SIAH1 PITPNA
MAHADEVAN_GIST_MORPHOLOGICAL_SWITCH	14	13	0.928571	2	57.7007	0.000840415	0.869507	MYO10 ELMO1
KEGG_COLORECTAL_CANCER	62	58	0.935484	3	18.0734	0.000937869	0.869507	CASP9 APPL DCC
AXON_GUIDANCE	22	16	0.727273	2	45.3357	0.00128492	0.869507	UNC5C SIAH1
DAZARD_RESPONSE_TO_UV_SCC_DN	96	67	0.697917	3	15.5057	0.00142709	0.869507	ADORA2B SIAH2 SIAH1
SMALL_GTPASE_MEDIATED_SIGNAL_TRANSDUCTION	88	67	0.761364	3	15.5057	0.00142709	0.869507	FGD1 SIAH2 ELMO1
FRASOR_RESPONSE_TO_ESTRADIOL_UP	32	20	0.625	2	35.2957	0.00201763	1	SIAH2 PEG10
V$HOX13_01	32	21	0.65625	2	33.452	0.00222539	1	UNC5B UNC5C
POTTI_CYTOXAN_SENSITIVITY	33	24	0.727273	2	28.8873	0.00290665	1	PEG10 KIF22
AGT EpiMod
Gene List	nList	nRep	fRep	nOVLAP	OR	pvalue	adjPval	Genes
KEGG_RENIN_ANGIOTENSIN_SYSTEM	17	16	0.941176	7	691.819	3.09996e-16	1.32213e-12	ACE2 CMA1 AGT ACE AGTR2 ENPEP MAS1
BIOCARTA_ACE2_PATHWAY	13	11	0.846154	5	583.558	7.57402e-12	1.61516e-08	ACE2 CMA1 AGT ACE AGTR2
REACTOME_PEPTIDE_LIGAND_BINDING_RECEPTORS	173	118	0.682081	5	31.9876	2.53992e-06	0.00361092	EDN2 EDN3 EDNRB AGT AGTR2
SOLUBLE_FRACTION	160	126	0.7875	5	29.8484	3.5131e-06	0.00374585	COMT EDN2 EDN3 AGT ACE
REACTOME_CLASS_A1_RHODOPSIN_LIKE_RECEPTORS	292	192	0.657534	5	19.1564	2.75168e-05	0.0234719	AGT AGTR2 EDN2 EDN3 EDNRB
REACTOME_G_ALPHA_Q_SIGNALLING_EVENTS	157	106	0.675159	4	25.8228	4.86445e-05	0.034279	EDN2 EDN3 EDNRB AGT
PEPTIDASE_ACTIVITY	171	110	0.643275	4	24.8514	5.62609e-05	0.034279	ACE KEL ENPEP ACE2
module_92	146	116	0.794521	4	23.486	6.92766e-05	0.0369331	EDN2 EDN3 AGT ENPEP
REACTOME_GPCR_LIGAND_BINDING	392	264	0.673469	5	13.6982	0.000126283	0.0598439	AGT AGTR2 EDN2 EDN3 EDNRB
REACTOME_DOWNSTREAM_EVENTS_IN_GPCR_SIGNALING	448	310	0.691964	5	11.559	0.000268827	0.114655	AGT AGTR2 EDN2 EDN3 EDNRB
ADRA1A EpiMod
Gene List	nList	nRep	fRep	nOVLAP	OR	pvalue	adjPval	Genes
REACTOME_CHEMOKINE_RECEPTORS_BIND_CHEMOKINES	55	40	0.727273	7	218.398	2.64386e-13	1.12761e-09	CXCL1 IL8RB IL8RA CXCL5 CXCL6 CXCL2 CXCL3
REACTOME_CLASS_A1_RHODOPSIN_LIKE_RECEPTORS	292	192	0.657534	9	70.3696	8.13046e-12	1.73382e-08	CXCL5 CXCL6 ADRA1D ADRA1A CXCL1 IL8RB IL8RA CXCL2 CXCL3
GRAHAM_CML_QUIESCENT_VS_CML_DIVIDING_UP	23	19	0.826087	5	287.294	1.2614e-10	1.53422e-07	CXCL1 CXCL2 CXCL3 CXCL5 CXCL6
REACTOME_GPCR_LIGAND_BINDING	392	264	0.673469	9	50.0144	1.43889e-10	1.53422e-07	CXCL5 CXCL6 ADRA1D ADRA1A CXCL1 IL8RB IL8RA CXCL2 CXCL3
REACTOME_DOWNSTREAM_EVENTS_IN_GPCR_SIGNALING	448	310	0.691964	9	42.1655	6.05622e-10	4.26723e-07	CXCL5 CXCL6 ADRA1D ADRA1A CXCL1 IL8RB IL8RA CXCL2 CXCL3
REACTOME_G_ALPHA_I_SIGNALLING_EVENTS	177	117	0.661017	7	65.6442	6.59374e-10	4.26723e-07	CXCL5 CXCL6 CXCL1 IL8RB IL8RA CXCL2 CXCL3
REACTOME_PEPTIDE_LIGAND_BINDING_RECEPTORS	173	118	0.682081	7	65.0527	7.00367e-10	4.26723e-07	CXCL5 CXCL6 CXCL1 IL8RB IL8RA CXCL2 CXCL3
KEGG_CHEMOKINE_SIGNALING_PATHWAY	190	140	0.736842	7	54.1737	2.34192e-09	1.08251e-06	CXCL5 CXCL6 CXCL1 IL8RB IL8RA CXCL2 CXCL3
CHEMOKINE_ACTIVITY	42	33	0.785714	5	143.923	2.53813e-09	1.08251e-06	CXCL1 CXCL5 CXCL6 CXCL2 CXCL3
CHEMOKINE_RECEPTOR_BINDING	43	33	0.767442	5	143.923	2.53813e-09	1.08251e-06	CXCL1 CXCL5 CXCL6 CXCL2 CXCL3
MAHADEVAN_RESPONSE_TO_MP470_UP	19	13	0.684211	4	317.597	5.74521e-09	2.17504e-06	CXCL1 CXCL3 CXCL5 CXCL6
G_PROTEIN_COUPLED_RECEPTOR_BINDING	54	39	0.722222	5	118.533	6.1197e-09	2.17504e-06	CXCL1 CXCL5 CXCL6 CXCL2 CXCL3
Th17 Chemokines	16	15	0.9375	4	262.748	1.09443e-08	3.59058e-06	CXCL1 CXCL2 CXCL5 CXCL6
ZUCCHI_METASTASIS_DN	28	20	0.714286	4	181.999	3.86359e-08	1.17702e-05	CXCL1 CXCL6 CXCL2 CXCL3
KEGG_CYTOKINE_CYTOKINE_RECEPTOR_INTERACTION	267	213	0.797753	7	34.6698	4.37934e-08	1.24519e-05	CXCL5 CXCL6 CXCL1 IL8RB IL8RA CXCL2 CXCL3
GNF2_MMP1	32	25	0.78125	4	138.224	1.00329e-07	2.6744e-05	CXCL1 CXCL5 CXCL6 CXCL3
CYTOKINE_ACTIVITY	111	83	0.747748	5	51.6353	2.95027e-07	7.40171e-05	CXCL5 CXCL6 CXCL1 CXCL2 CXCL3
module_263	43	38	0.883721	4	85.5185	5.77221e-07	0.000136769	CXCL1 CXCL5 CXCL6 CXCL2
module_108	52	43	0.826923	4	74.6269	9.5981e-07	0.000215452	CXCL1 CXCL5 CXCL6 CXCL2
GAURNIER_PSMD4_TARGETS	59	44	0.745763	4	72.7644	1.05464e-06	0.000224903	CXCL1 CXCL6 CXCL2 CXCL3
DYSTROPHIN_ASSOCIATED_GLYCOPROTEIN_COMPLEX	14	13	0.928571	3	196.84	1.53857e-06	0.000312477	SNTB2 SNTG1 SNTB1
GRAHAM_NORMAL_QUIESCENT_VS_NORMAL_DIVIDING_UP	66	51	0.772727	4	61.9058	1.92672e-06	0.000373521	CXCL1 CXCL6 CXCL2 CXCL3
EXTRACELLULAR_REGION_PART	332	239	0.71988	6	22.9145	2.62097e-06	0.000486019	SNTG1 CXCL1 SNTB2 SNTB1 CXCL2 CXCL3
VART_KSHV_INFECTION_ANGIOGENIC_MARKERS_UP	165	132	0.8	5	31.5743	2.98886e-06	0.000531145	CXCL5 CXCL6 IL8RA CXCL2 CXCL3
BASAL_LAMINA	21	17	0.809524	3	141.672	3.64179e-06	0.00062129	SNTB2 SNTG1 SNTB1
IL-7	67	61	0.910448	4	51.0047	3.9799e-06	0.000652857	CXCL1 CXCL2 CXCL3 CXCL5
GRAHAM_CML_DIVIDING_VS_NORMAL_QUIESCENT_DN	95	62	0.652632	4	50.1349	4.24974e-06	0.000671302	CXCL1 CXCL6 CXCL2 CXCL3
module_76	79	66	0.835443	4	46.8498	5.46666e-06	0.00083269	CXCL1 CXCL5 CXCL6 CXCL2
LOCOMOTORY_BEHAVIOR	91	69	0.758242	4	44.7313	6.53583e-06	0.000961218	CXCL1 CXCL5 CXCL6 CXCL2
EXTRACELLULAR_REGION	439	300	0.683371	6	18.0113	9.79747e-06	0.00139287	CXCL1 CXCL2 CXCL3 SNTG1 SNTB2 SNTB1
IL-1	222	172	0.774775	5	23.8913	1.09693e-05	0.00150917	CXCL5 CXCL2 CXCL1 CXCL3 CXCL6
BASEMENT_MEMBRANE	37	30	0.810811	3	73.6259	2.14294e-05	0.00285613	SNTG1 SNTB1 SNTB2
WANG_SMARCE1_TARGETS_DN	338	208	0.615385	5	19.5666	2.76138e-05	0.00356887	CXCL5 CXCL6 CXCL1 CXCL2 CXCL3
ONDER_CDH1_TARGETS_3_DN	54	36	0.666667	3	60.2407	3.74336e-05	0.00469572	CXCL1 CXCL2 CXCL3
VART_KSHV_INFECTION_ANGIOGENIC_MARKERS_DN	141	110	0.780142	4	27.3197	4.17361e-05	0.00508585	CXCL5 CXCL1 IL8RB CXCL2
BEHAVIOR	149	112	0.751678	4	26.8076	4.48019e-05	0.00530778	CXCL5 CXCL6 CXCL1 CXCL2
BROWNE_HCMV_INFECTION_1HR_UP	61	41	0.672131	3	52.2757	5.5576e-05	0.00640626	CXCL1 GRIA1 CXCL2
RAS-Bildpathway	181	122	0.674033	4	24.5006	6.267e-05	0.00703388	CXCL1 CXCL2 CXCL3 CXCL5
SIMBULAN_UV_RESPONSE_NORMAL_UP	8	7	0.875	2	240.738	6.98419e-05	0.00763784	CXCL2 CXCL3
GRAHAM_CML_QUIESCENT_VS_NORMAL_DIVIDING_UP	56	45	0.803571	3	47.3761	7.36488e-05	0.00766127	CXCL5 CXCL6 CXCL2
EXTRACELLULAR_MATRIX_PART	57	45	0.789474	3	47.3761	7.36488e-05	0.00766127	SNTG1 SNTB2 SNTB1
BRUECKNER_TARGETS_OF_MIRLET7A3_DN	77	47	0.61039	3	45.1455	8.39705e-05	0.00852701	CXCL1 CXCL5 CXCL3
AUJLA_IL22_AND_IL17A_SIGNALING	10	8	0.8	2	200.376	9.30215e-05	0.00922644	CXCL5 CXCL1
CYTOKINESandGROWTHFACTORS	449	279	0.621381	5	14.3583	0.000112765	0.0108706	CXCL1 CXCL2 CXCL3 CXCL5 CXCL6
CELL_CELL_SIGNALING	400	280	0.7	5	14.3041	0.000114696	0.0108706	CXCL5 CXCL6 GRIA1 ADRA1D ADRA1A
RECEPTOR_BINDING	373	282	0.756032	5	14.1974	0.000118634	0.0109347	CXCL5 CXCL6 CXCL1 CXCL2 CXCL3
KEGG_EPITHELIAL_CELL_SIGNALING_IN_HELICOBACTER_PYLORI_INFECTION	68	53	0.779412	3	39.7289	0.0001205	0.0109347	CXCL1 IL8RB IL8RA
HINATA_NFKB_TARGETS_FIBROBLAST_UP	66	54	0.818182	3	38.9263	0.000127445	0.011324	CXCL5 CXCL6 CXCL3
MAHAJAN_RESPONSE_TO_IL1A_UP	67	55	0.820896	3	38.2323	0.000134647	0.0117198	CXCL5 CXCL2 CXCL3
module_46	386	314	0.813472	5	12.6706	0.000197102	0.0168128	CXCL5 CXCL6 ADRA1D CXCL1 CXCL2
FERRARI_RESPONSE_TO_FENRETINIDE_UP	17	13	0.764706	2	110.118	0.00025773	0.0215533	CXCL2 CXCL3
LENAOUR_DENDRITIC_CELL_MATURATION_DN	100	72	0.72	3	28.7366	0.000300312	0.0246314	CXCL5 CXCL2 CXCL3
PROTEINACEOUS_EXTRACELLULAR_MATRIX	98	73	0.744898	3	28.3239	0.000312832	0.0251741	SNTG1 SNTB2 SNTB1
RESPONSE_TO_CHEMICAL_STIMULUS	306	188	0.614379	4	15.5813	0.000334536	0.0262781	CXCL5 CXCL6 CXCL1 CXCL2
EXTRACELLULAR_MATRIX	100	75	0.75	3	27.5331	0.000338874	0.0262781	SNTG1 SNTB2 SNTB1
RUTELLA_RESPONSE_TO_CSF2RB_AND_IL4_DN	315	191	0.606349	4	15.3255	0.000355414	0.0270686	CXCL5 CXCL1 SNTB1 CXCL3
DAZARD_UV_RESPONSE_CLUSTER_G2	21	16	0.761905	2	86.7381	0.000395219	0.0295721	CXCL2 CXCL3
TIAN_TNF_SIGNALING_VIA_NFKB	21	19	0.904762	2	71.4218	0.000561357	0.0412791	CXCL2 CXCL3
INFLAMMATORY_RESPONSE	124	91	0.733871	3	22.486	0.000598823	0.0432878	CXCL6 CXCL1 CXCL2
module_488	28	20	0.714286	2	67.5347	0.000623054	0.0442888	CXCL1 ADRA1A
RESPONSE_TO_EXTERNAL_STIMULUS	306	223	0.728758	4	13.0348	0.000640489	0.0447817	CXCL5 CXCL6 CXCL1 CXCL2
REGULATION_OF_CELL_PROLIFERATION	299	227	0.759197	4	12.7941	0.000684999	0.0471213	CXCL5 ADRA1D ADRA1A CXCL1
ONDER_CDH1_TARGETS_1_DN	169	112	0.662722	3	18.1199	0.00109728	0.0731236	CXCL1 CXCL2 CXCL3
module_223	140	112	0.8	3	18.1199	0.00109728	0.0731236	CXCL5 CXCL1 ADRA1D
AMIT_SERUM_RESPONSE_40_MCF10A	33	27	0.818182	2	48.6499	0.00114231	0.0749529	CXCL2 CXCL3
module_92	146	116	0.794521	3	17.4705	0.00121477	0.0782241	CXCL5 CXCL6 ADRA1D
AMINE_RECEPTOR_ACTIVITY	34	28	0.823529	2	46.7918	0.00122884	0.0782241	ADRA1D ADRA1A
GRAHAM_CML_QUIESCENT_VS_NORMAL_QUIESCENT_DN	45	29	0.644444	2	45.1183	0.00131844	0.0814948	CXCL1 CXCL6
REACTOME_AMINE_LIGAND_BINDING_RECEPTORS	42	29	0.690476	2	45.1183	0.00131844	0.0814948	ADRA1D ADRA1A
HALMOS_CEBPA_TARGETS_UP	42	31	0.738095	2	41.9688	0.00150676	0.0905119	CXCL2 CXCL3
GNF2_PTX3	36	31	0.861111	2	41.9688	0.00150676	0.0905119	CXCL1 CXCL6
module_521	34	33	0.970588	2	39.2715	0.0017072	0.101128	CXCL5 ADRA1D
CROONQUIST_STROMAL_STIMULATION_UP	48	35	0.729167	2	36.8757	0.00191967	0.110749	CXCL2 CXCL3
V$NFKAPPAB_01	194	136	0.701031	3	14.8102	0.00192155	0.110749	CXCL5 CXCL6 CXCL2
RESPONSE_TO_WOUNDING	185	140	0.756757	3	14.3714	0.00208806	0.118741	CXCL6 CXCL1 CXCL2
module_75	391	312	0.797954	4	9.15652	0.00224175	0.125804	CXCL5 CXCL6 CXCL1 CXCL2
GABRB2 EpiMod
Gene List	nList	nRep	fRep	nOVLAP	OR	pvalue	adjPval	Genes
KEGG_NEUROACTIVE_LIGAND_RECEPTOR_INTERACTION	272	204	0.75	13	69.4553	2.46797e-16	1.05259e-12	DRD4 DRD5 GABRQ GABRG1 GABRG2 GABRG3 GABRB3 GABRB2 GABRB1 GABRA6 GABRA3 GABRA4 GABRA1
NEUROTRANSMITTER_RECEPTOR_ACTIVITY	50	39	0.78	6	94.3309	5.35988e-10	1.14299e-06	GABRG2 DRD4 DRD5 GABRA6 GABRA3 GABRA4
NEUROTRANSMITTER_BINDING	53	42	0.792453	6	86.4482	8.57571e-10	1.21918e-06	GABRG2 DRD4 DRD5 GABRA6 GABRA3 GABRA4
RECEPTOR_ACTIVITY	572	413	0.722028	11	21.113	1.57715e-09	1.68163e-06	DRD4 DRD5 GABRQ GABRG2 GABRB3 GABRB2 GABRB1 GABRA6 GABRA3 GABRA4 GABRA1
BIOCARTA_GABA_PATHWAY	10	8	0.8	4	445.792	2.73013e-09	2.3288e-06	GABRA6 GABRA3 GABRA4 GABRA1
GABA_RECEPTOR_ACTIVITY	11	9	0.818182	4	356.014	4.9057e-09	3.48714e-06	GABRB3 GABRB2 GABRB1 GABRA1
module_274	82	62	0.756098	5	42.5242	5.00505e-07	0.000304951	GABRG2 DRD4 GABRB3 GABRB1 GABRA1
INTEGRAL_TO_PLASMA_MEMBRANE	963	585	0.607477	10	11.7874	8.1103e-07	0.000416	DRD4 GABRQ GABRG2 GABRB3 GABRB2 GABRB1 GABRA6 GABRA3 GABRA4 GABRA1
INTRINSIC_TO_PLASMA_MEMBRANE	977	590	0.603889	10	11.6773	8.77842e-07	0.000416	DRD4 GABRQ GABRG2 GABRB3 GABRB2 GABRB1 GABRA6 GABRA3 GABRA4 GABRA1
G_PROTEIN_COUPLED_RECEPTOR_PROTEIN_SIGNALING_PATHWAY	326	231	0.708589	7	17.1208	1.4745e-06	0.000628876	DRD4 DRD5 GABRG2 GABRB2 GABRA3 GABRA4 GABRA1
PLASMA_MEMBRANE_PART	1141	705	0.617879	10	9.58093	4.52698e-06	0.00157125	DRD4 GABRQ GABRG2 GABRB3 GABRB2 GABRB1 GABRA6 GABRA3 GABRA4 GABRA1
PLASMA_MEMBRANE	1393	895	0.642498	11	8.94569	4.68175e-06	0.00157125	DRD4 DRD5 GABRQ GABRG2 GABRB3 GABRB2 GABRB1 GABRA6 GABRA3 GABRA4 GABRA1
BIOCARTA_MEF2D_PATHWAY	21	13	0.619048	3	128.155	4.78926e-06	0.00157125	CABIN1 PPP3CC PPP3CA
TRANSMEMBRANE_RECEPTOR_ACTIVITY	411	292	0.710462	7	13.3451	7.03898e-06	0.00214438	DRD4 DRD5 GABRQ GABRB3 GABRB2 GABRB1 GABRA1
module_214	27	19	0.703704	3	80.1801	1.6059e-05	0.0045661	GABRB3 GABRG2 GABRG3
BIOCARTA_HDAC_PATHWAY	30	23	0.766667	3	64.3274	2.91479e-05	0.00776973	PPP3CC CABIN1 PPP3CA
MEMBRANE	1942	1200	0.61792	11	6.33894	8.11891e-05	0.0203424	DRD4 DRD5 GABRQ GABRG2 GABRB3 GABRB2 GABRB1 GABRA6 GABRA3 GABRA4 GABRA1
MEMBRANE_PART	1633	982	0.601347	10	6.56711	8.69053e-05	0.0203424	DRD4 GABRQ GABRG2 GABRB3 GABRB2 GABRB1 GABRA6 GABRA3 GABRA4 GABRA1
SIGNAL_TRANSDUCTION	1598	1214	0.7597	11	6.25099	9.06225e-05	0.0203424	DRD4 DRD5 GABRQ GABRG2 GABRB3 GABRB2 GABRB1 GABRA6 GABRA3 GABRA4 GABRA1
BCAN EpiMod
Gene List	nList	nRep	fRep	nOVLAP	OR	pvalue	adjPval	Genes
module_562	21	16	0.761905	4	397.001	3.07401e-09	1.0756e-05	MMP10 MMP7 TIMP2 MMP13
PROTEOLYSIS	188	129	0.68617	6	87.914	5.04383e-09	1.0756e-05	ADAMTS5 MMP10 MMP8 MMP7 MMP13 ADAMTS4
module_211	11	9	0.818182	3	504.597	1.50009e-07	0.000213262	MMP10 MMP7 MMP13
module_210	28	24	0.857143	3	148.022	3.57606e-06	0.00366631	MMP10 MMP7 MMP13
module_324	131	91	0.694656	4	55.5098	4.29814e-06	0.00366631	MMP10 MMP7 MMP13 UMOD
EXTRACELLULAR_REGION_PART	332	239	0.71988	5	30.4227	7.54873e-06	0.00530908	ADAMTS5 MMP10 MMP8 MMP7 MMP13
module_280	44	32	0.727273	3	107.311	8.71362e-06	0.00530908	MMP10 MMP7 MMP13
EXTRACELLULAR_REGION	439	300	0.683371	5	23.9382	2.29006e-05	0.0122089	ADAMTS5 MMP10 MMP8 MMP7 MMP13
EXTRACELLULAR_SPACE	239	169	0.707113	4	29.033	5.01012e-05	0.0215357	MMP10 MMP8 MMP7 MMP13
module_107	77	57	0.74026	3	57.7983	5.0494e-05	0.0215357	MMP10 MMP7 MMP13
ZINC_ION_BINDING	89	63	0.707865	3	51.9238	6.82362e-05	0.026457	MMP10 MMP8 MMP13
TRANSITION_METAL_ION_BINDING	110	79	0.718182	3	40.9667	0.000134337	0.0477457	MMP10 MMP8 MMP13
CELLULAR_PROTEIN_METABOLIC_PROCESS	1086	759	0.698895	6	13.1676	0.000169679	0.0548365	ADAMTS4 ADAMTS5 MMP10 MMP8 MMP7 MMP13
CELLULAR_MACROMOLECULE_METABOLIC_PROCESS	1100	767	0.697273	6	13.0136	0.000180003	0.0548365	ADAMTS4 ADAMTS5 MMP10 MMP8 MMP7 MMP13
METALLOENDOPEPTIDASE_ACTIVITY	27	18	0.666667	2	113.493	0.000250086	0.0711077	MMP8 MMP13
JEON_SMAD6_TARGETS_UP	23	20	0.869565	2	101.234	0.000310115	0.0768846	MMP7 TIMP2
module_371	25	20	0.8	2	101.234	0.000310115	0.0768846	MMP10 MMP7
PROTEIN_METABOLIC_PROCESS	1199	853	0.711426	6	11.5435	0.000326614	0.0768846	ADAMTS4 ADAMTS5 MMP10 MMP8 MMP7 MMP13
LI_CISPLATIN_RESISTANCE_DN	34	21	0.617647	2	95.8168	0.000342511	0.0768846	BCAN MMP10
CATION_BINDING	208	142	0.682692	3	22.2429	0.000758594	0.16177	MMP10 MMP8 MMP13
CHIBA_RESPONSE_TO_TSA_UP	43	38	0.883721	2	50.6134	0.00113258	0.230021	TIMP2 MMP13
LECT1 EpiMod
Gene List	nList	nRep	fRep	nOVLAP	OR	pvalue	adjPval	Genes
BIOCARTA_CLASSIC_PATHWAY	14	11	0.785714	6	607.826	7.94459e-14	3.38837e-10	C1S C1QB C1QA C1R C1QC C7
BIOCARTA_COMP_PATHWAY	19	16	0.842105	6	311.192	1.36588e-12	2.91275e-09	C1S C1QB C1QA C1R C1QC C7
module_130	23	20	0.869565	6	220.909	6.56811e-12	9.33767e-09	CLU C1S C1QB C1QA C1R C7
KEGG_COMPLEMENT_AND_COAGULATION_CASCADES	69	63	0.913043	7	69.763	1.67027e-10	1.78093e-07	CR1 C7 C1S C1QB C1QA C1R C1QC
PICCALUGA_ANGIOIMMUNOBLASTIC_LYMPHOMA_UP	202	130	0.643564	8	39.4223	7.8947e-10	6.73418e-07	CLU C7 C1S C1QB C1QA C1R C1QC CP
module_58	21	19	0.904762	5	173.243	9.67618e-10	6.87815e-07	CLU C1S C1QA C1R C7
REACTOME_INNATE_IMMUNITY_SIGNALING	136	94	0.691176	6	35.2977	1.22241e-07	7.44797e-05	C7 C1S C1QB C1QA C1R C1QC
RODWELL_AGING_KIDNEY_NO_BLOOD_UP	149	98	0.657718	6	33.7504	1.56999e-07	8.37e-05	C7 C1S C1QB C1QA C1R MFGE8
KEGG_PRION_DISEASES	35	33	0.942857	4	62.8047	1.52808e-06	0.00072414	C1QB C1QA C1QC C7
NAKAYAMA_SOFT_TISSUE_TUMORS_PCA1_UP	74	51	0.689189	4	38.7244	9.0443e-06	0.0038574	C1S C1QB C1QA IL4R
module_75	391	312	0.797954	7	12.4386	1.0893e-05	0.00387078	C7 C1S C1QA C1R IL4R CLU CR1
module_46	386	314	0.813472	7	12.3551	1.136e-05	0.00387078	C7 C1S C1QA C1R IL4R CLU CR1
VERHAAK_AML_WITH_NPM1_MUTATED_UP	180	117	0.65	5	21.5154	1.17984e-05	0.00387078	CLU SMPDL3A PTX3 C1QB C1QA
RODWELL_AGING_KIDNEY_UP	342	216	0.631579	6	14.5677	1.61454e-05	0.00491859	C7 C1S C1QB C1QA C1R MFGE8
THUM_SYSTOLIC_HEART_FAILURE_UP	408	248	0.607843	6	12.5914	3.53933e-05	0.0100635	C1S C1QB C1QA C1QC MFGE8 CP
REACTOME_SIGNALING_IN_IMMUNE_SYSTEM	366	279	0.762295	6	11.1111	6.86102e-05	0.0182889	C7 C1S C1QB C1QA C1R C1QC
module_23	557	343	0.615799	6	8.92245	0.00021503	0.0518539	XDH C1S C1QB HRG IL4R CP
module_55	811	498	0.614057	7	7.52634	0.000218844	0.0518539	C7 C1S C1QB HRG CP XDH IL4R
module_88	816	505	0.618873	7	7.413	0.000238728	0.0535882	C7 C1S C1QB HRG CP XDH IL4R
GAUSSMANN_MLL_AF4_FUSION_TARGETS_E_UP	75	47	0.626667	3	29.2504	0.000256021	0.0545964	CLU C1S CP
module_176	227	144	0.634361	4	12.8688	0.000528669	0.103701	C7 C1S C1R CP
LIU_VAV3_PROSTATE_CARCINOGENESIS_DN	17	13	0.764706	2	73.6167	0.000534916	0.103701	CLU C1R
HSIAO_LIVER_SPECIFIC_GENES	238	152	0.638655	4	12.1637	0.000648645	0.120281	C1S C1R HRG CP
HOSHIDA_LIVER_CANCER_SUBCLASS_S3	266	164	0.616541	4	11.2361	0.000863328	0.150679	C1S C1R HRG CP
OPRM1 EpiMod
Gene List	nList	nRep	fRep	nOVLAP	OR	pvalue	adjPval	Genes
SECOND_MESSENGER_MEDIATED_SIGNALING	146	118	0.808219	10	166.331	7.06253e-16	3.01217e-12	GNA15 CHRM2 CNR2 CNR1 GRM4 GRM2 LTB4R OPRM1 OPRD1 OPRK1
G_PROTEIN_COUPLED_RECEPTOR_PROTEIN_SIGNALING_PATHWAY	326	231	0.708589	11	118.552	7.50897e-15	1.60129e-11	OPRM1 OPRD1 OPRK1 GNA15 CHRM2 CNR2 CNR1 GRM4 GRM2 LTB4R HCRTR1
KEGG_NEUROACTIVE_LIGAND_RECEPTOR_INTERACTION	272	204	0.75	10	92.0054	1.90807e-13	2.71264e-10	OPRM1 OPRD1 OPRK1 CHRM2 CNR2 CNR1 GRM4 GRM2 LTB4R HCRTR1
G_PROTEIN_SIGNALING_COUPLED_TO_CYCLIC_NUCLEOTIDE_SECOND_MESSENGER	98	82	0.836735	8	130.081	4.6753e-13	4.4102e-10	CHRM2 CNR2 CNR1 GRM4 GRM2 OPRM1 OPRD1 OPRK1
CYCLIC_NUCLEOTIDE_MEDIATED_SIGNALING	100	83	0.83	8	128.373	5.17022e-13	4.4102e-10	CHRM2 CNR2 CNR1 GRM4 GRM2 OPRM1 OPRD1 OPRK1
REACTOME_GPCR_LIGAND_BINDING	392	264	0.673469	10	69.7778	2.56746e-12	1.82504e-09	OPRM1 OPRD1 OPRK1 GRM4 GRM2 HCRTR1 CHRM2 CNR2 CNR1 LTB4R
G_PROTEIN_COUPLED_RECEPTOR_ACTIVITY	185	120	0.648649	8	85.9056	1.072e-11	6.53155e-09	CHRM2 CNR2 CNR1 GRM4 GRM2 OPRM1 OPRD1 OPRK1
CELL_SURFACE_RECEPTOR_LINKED_SIGNAL_TRANSDUCTION_GO_0007166	622	462	0.742765	11	56.0889	1.58765e-11	8.46418e-09	OPRM1 OPRD1 OPRK1 GNA15 GRM4 GRM2 HCRTR1 CHRM2 CNR2 CNR1 LTB4R
REACTOME_CLASS_A1_RHODOPSIN_LIKE_RECEPTORS	292	192	0.657534	8	51.8235	4.78051e-10	2.26543e-07	OPRM1 OPRD1 OPRK1 CHRM2 CNR2 CNR1 LTB4R HCRTR1
REACTOME_DOWNSTREAM_EVENTS_IN_GPCR_SIGNALING	448	310	0.691964	9	42.1655	6.05622e-10	2.58298e-07	OPRM1 OPRD1 OPRK1 GNA15 HCRTR1 CHRM2 CNR2 CNR1 LTB4R
INTRACELLULAR_SIGNALING_CASCADE	648	514	0.79321	10	33.9496	1.92138e-09	7.44971e-07	OPRM1 OPRD1 OPRK1 GNA15 GRM4 GRM2 CHRM2 CNR2 CNR1 LTB4R
INTEGRAL_TO_PLASMA_MEMBRANE	963	585	0.607477	10	29.5082	6.82235e-09	2.25851e-06	OPRM1 OPRD1 OPRK1 GRM4 GRM2 HCRTR1 CHRM2 CNR2 CNR1 LTB4R
RHODOPSIN_LIKE_RECEPTOR_ACTIVITY	131	89	0.679389	6	65.4472	7.22293e-09	2.25851e-06	CHRM2 CNR2 CNR1 OPRM1 OPRD1 OPRK1
INTRINSIC_TO_PLASMA_MEMBRANE	977	590	0.603889	10	29.1813	7.41362e-09	2.25851e-06	OPRM1 OPRD1 OPRK1 GRM4 GRM2 HCRTR1 CHRM2 CNR2 CNR1 LTB4R
TRANSMEMBRANE_RECEPTOR_ACTIVITY	411	292	0.710462	8	33.1831	1.33662e-08	3.80045e-06	OPRM1 OPRD1 OPRK1 GRM4 GRM2 CHRM2 CNR2 CNR1
PLASMA_MEMBRANE	1393	895	0.642498	11	26.8337	2.03504e-08	5.42465e-06	OPRM1 OPRD1 OPRK1 GNA15 GRM4 GRM2 HCRTR1 CHRM2 CNR2 CNR1 LTB4R
REACTOME_G_ALPHA_I_SIGNALLING_EVENTS	177	117	0.661017	6	48.8276	3.78654e-08	9.49976e-06	CHRM2 CNR2 CNR1 OPRM1 OPRD1 OPRK1
PLASMA_MEMBRANE_PART	1141	705	0.617879	10	23.9582	4.1895e-08	9.92678e-06	OPRM1 OPRD1 OPRK1 GRM4 GRM2 HCRTR1 CHRM2 CNR2 CNR1 LTB4R
RECEPTOR_ACTIVITY	572	413	0.722028	8	22.8905	2.01072e-07	4.51354e-05	OPRM1 OPRD1 OPRK1 GRM4 GRM2 CHRM2 CNR2 CNR1
MEMBRANE	1942	1200	0.61792	11	19.0256	4.56768e-07	9.74058e-05	GRM4 GRM2 CNR2 CNR1 LTB4R OPRM1 OPRD1 OPRK1 GNA15 HCRTR1 CHRM2
SIGNAL_TRANSDUCTION	1598	1214	0.7597	11	18.762	5.16036e-07	0.000104804	GRM4 GRM2 CNR2 CNR1 LTB4R OPRM1 OPRD1 OPRK1 GNA15 HCRTR1 CHRM2
MEMBRANE_PART	1633	982	0.601347	10	16.4283	1.00759e-06	0.000195334	GRM4 GRM2 CNR2 CNR1 LTB4R OPRM1 OPRD1 OPRK1 HCRTR1 CHRM2
BEHAVIOR	149	112	0.751678	5	37.5637	1.32322e-06	0.00024537	CNR2 CNR1 OPRM1 OPRK1 HCRTR1
G_PROTEIN_SIGNALING_COUPLED_TO_CAMP_NUCLEOTIDE_SECOND_MESSENGER	64	53	0.828125	4	59.3369	2.25276e-06	0.000384321	GRM4 GRM2 CHRM2 OPRK1
CAMP_MEDIATED_SIGNALING	65	53	0.815385	4	59.3369	2.25276e-06	0.000384321	GRM4 GRM2 CHRM2 OPRK1
module_375	84	62	0.738095	4	50.1349	4.24974e-06	0.000697121	GRM2 GNA15 OPRK1 HCRTR1
module_146	92	66	0.717391	4	46.8498	5.46666e-06	0.00086353	LTB4R OPRK1 CNR1 HCRTR1
module_289	118	87	0.737288	4	34.9797	1.65011e-05	0.00251347	GNA15 GRM2 OPRK1 HCRTR1
G_PROTEIN_SIGNALING_COUPLED_TO_IP3_SECOND_MESSENGERPHOSPHOLIPASE_C_ACTIVATING	41	32	0.780488	3	68.5217	2.61211e-05	0.0038416	GNA15 CHRM2 LTB4R
LEP EpiMod
Gene List	nList	nRep	fRep	nOVLAP	OR	pvalue	adjPval	Genes
CYTOKINESandGROWTHFACTORS	449	279	0.621381	6	25.9367	2.11404e-06	0.00901639	CRH IL28B LEP UCN UCN2 UCN3
KEGG_JAK_STAT_SIGNALING_PATHWAY	155	117	0.754839	4	32.0002	2.6956e-05	0.0574837	LEPR LEP IL10RB IL28B
SECRETIN_LIKE_RECEPTOR_ACTIVITY	10	8	0.8	2	241.158	6.75394e-05	0.0705364	CRHR2 CRHR1
NEUROPEPTIDE_HORMONE_ACTIVITY	12	9	0.75	2	206.451	8.67579e-05	0.0705364	UCN CRH
LEARNING_AND_OR_MEMORY	14	10	0.714286	2	181.187	0.000108349	0.0705364	CRHBP CRH
REACTOME_CLASS_B2_SECRETIN_FAMILY_RECEPTORS	85	61	0.717647	3	41.8273	0.000112207	0.0705364	CRHR2 CRHR1 CRH
BIOCARTA_LEPTIN_PATHWAY	11	11	1	2	160.892	0.000132307	0.0705364	LEPR LEP
ENERGY_RESERVE_METABOLIC_PROCESS	15	11	0.733333	2	160.892	0.000132307	0.0705364	LEPR LEP
KEGG_NEUROACTIVE_LIGAND_RECEPTOR_INTERACTION	272	204	0.75	4	17.8891	0.000235984	0.103428	LEPR LEP CRHR2 CRHR1
REACTOME_G_ALPHA_S_SIGNALLING_EVENTS	126	79	0.626984	3	31.8813	0.000242504	0.103428	CRHR2 CRHR1 CRH
KEGG_CYTOKINE_CYTOKINE_RECEPTOR_INTERACTION	267	213	0.797753	4	17.099	0.000278599	0.10802	LEPR LEP IL10RB IL28B
MULTI_ORGANISM_PROCESS	162	104	0.641975	3	23.9045	0.000545752	0.193969	CRHBP CRHR1 CRH
ENERGY_DERIVATION_BY_OXIDATION_OF_ORGANIC_COMPOUNDS	37	24	0.648649	2	66.3047	0.000656185	0.206563	LEPR LEP
BEHAVIOR	149	112	0.751678	3	22.1456	0.00067805	0.206563	CRHBP CRH LEP
RUGO_STRESS_RESPONSE_SUBSET_H	40	32	0.8	2	48.6479	0.00117073	0.295029	CRHBP IL10RB
KYNG_DNA_DAMAGE_BY_GAMMA_AND_UV_RADIATION	40	32	0.8	2	48.6479	0.00117073	0.295029	CRHBP IL10RB
SIGNAL_TRANSDUCTION	1598	1214	0.7597	7	7.14021	0.00118164	0.295029	CRHR2 CRHBP CRHR1 CRH UCN LEPR IL10RB
HORMONE_ACTIVITY	44	33	0.75	2	47.1519	0.00124514	0.295029	UCN CRH
NPY EpiMod
Gene List	nList	nRep	fRep	nOVLAP	OR	pvalue	adjPval	Genes
REACTOME_GPCR_LIGAND_BINDING	392	264	0.673469	29	34.9389	1.86954e-28	7.97357e-25	FZD8 TRH TRHR NPFFR2 NPFF IAPP GCG GLP1R GLP2R GRPR GRP HCRT HCRTR1 HCRTR2 NPY5R NPY1R NPY2R NPY MC1R MC3R MC4R MC5R PPY PPYR1 POMC GNRHR PYY SCT SCTR
REACTOME_DOWNSTREAM_EVENTS_IN_GPCR_SIGNALING	448	310	0.691964	28	26.8474	6.0122e-25	1.2821e-21	TRH TRHR NPFFR2 NPFF IAPP GCG GLP1R GLP2R GRPR GRP HCRT HCRTR1 HCRTR2 NPY5R NPY1R NPY2R NPY MC1R MC3R MC4R MC5R PPY PPYR1 POMC GNRHR PYY SCT SCTR
REACTOME_PEPTIDE_LIGAND_BINDING_RECEPTORS	173	118	0.682081	21	47.2949	1.01778e-24	1.44695e-21	PPY PPYR1 POMC NPY5R NPY1R NPY2R TRH TRHR NPFFR2 NPY MC1R MC3R PYY MC4R MC5R NPFF GRPR GRP HCRT HCRTR1 HCRTR2
G_PROTEIN_COUPLED_RECEPTOR_PROTEIN_SIGNALING_PATHWAY	326	231	0.708589	24	27.45	1.46074e-22	1.55751e-19	NPY5R NPY1R NPY2R GPR24 TRHR NPFFR2 AGRP NPY MC1R MC3R MC4R MC5R NPFF GCG GLP1R GLP2R PPYR1 GNRHR PYY SCTR GRPR GRP HCRTR1 HCRTR2
REACTOME_CLASS_A1_RHODOPSIN_LIKE_RECEPTORS	292	192	0.657534	22	28.8682	1.54776e-21	1.32024e-18	NPY5R NPY1R NPY2R TRH TRHR NPFFR2 NPY MC1R MC3R MC4R MC5R NPFF PPY PPYR1 POMC GNRHR PYY GRPR GRP HCRT HCRTR1 HCRTR2
FEEDING_BEHAVIOR	24	17	0.708333	10	234.308	3.42219e-18	2.43261e-15	GCG NPY PYY PMCH AGRP PPYR1 GPR24 MC4R HCRTR1 HCRTR2
KEGG_NEUROACTIVE_LIGAND_RECEPTOR_INTERACTION	272	204	0.75	19	20.9132	8.3712e-17	5.10045e-14	NPY5R NPY1R NPY2R GPR24 TRHR NPFFR2 MC1R MC3R MC4R MC5R GLP1R GLP2R PPYR1 MCHR2 GNRHR SCTR GRPR HCRTR1 HCRTR2
CELL_SURFACE_RECEPTOR_LINKED_SIGNAL_TRANSDUCTION_GO_0007166	622	462	0.742765	24	12.5658	1.7894e-15	9.53974e-13	GPR24 TRHR NPFFR2 AGRP NPFF GCG GLP1R GLP2R GRPR GRP HCRTR1 HCRTR2 NPY5R NPY1R NPY2R NPY MC1R MC3R MC4R MC5R PPYR1 GNRHR PYY SCTR
HORMONE_ACTIVITY	44	33	0.75	9	60.5048	1.01136e-12	4.79274e-10	NPY PPY POMC GAST GRP GNRH1 PYY AGRP TRH
REACTOME_G_ALPHA_S_SIGNALLING_EVENTS	126	79	0.626984	11	27.2187	6.84246e-12	2.91831e-09	GCG GLP1R GLP2R POMC MC1R MC3R MC4R MC5R SCT SCTR IAPP
SIGNAL_TRANSDUCTION	1598	1214	0.7597	31	6.99376	8.08137e-12	3.13337e-09	GLP2R GRPR GRP GPR24 NPFFR2 AGRP ASIP NPFF IAPP MC1R MC3R MC4R MC5R GNRHR GNRH1 PYY SCTR GLP1R HCRTR1 HCRTR2 NPY5R NPY1R NPY2R NPY PPYR1 REN TRH TRHR GCG ATP6AP2 POMC
CELL_CELL_SIGNALING	400	280	0.7	16	11.2458	6.95799e-11	2.47298e-08	TRH PCSK2 ASIP PCSK1 PCSK5 NPFF IAPP HCRT HCRTR1 HCRTR2 NPY POMC PCSK6 GNRH1 PYY SGNE1
REACTOME_G_ALPHA_Q_SIGNALLING_EVENTS	157	106	0.675159	11	19.4262	1.81917e-10	5.96828e-08	GCG TRH TRHR NPFFR2 GNRHR NPFF GRPR GRP HCRT HCRTR1 HCRTR2
G_PROTEIN_SIGNALING_COUPLED_TO_CYCLIC_NUCLEOTIDE_SECOND_MESSENGER	98	82	0.836735	10	22.8469	2.63972e-10	8.04172e-08	GLP1R GLP2R NPY1R NPY2R GPR24 NPY MC1R MC3R MC4R MC5R
CYCLIC_NUCLEOTIDE_MEDIATED_SIGNALING	100	83	0.83	10	22.5256	2.98494e-10	8.48718e-08	GLP1R GLP2R NPY1R NPY2R GPR24 NPY MC1R MC3R MC4R MC5R
BEHAVIOR	149	112	0.751678	11	18.2626	3.32443e-10	8.86169e-08	GCG PPYR1 PMCH NPY2R GPR24 AGRP NPY PYY MC4R HCRTR1 HCRTR2
module_289	118	87	0.737288	10	21.3395	4.80333e-10	1.20507e-07	GCG NPY1R NPY2R AGRP NPY SGNE1 SCTR GRP HCRTR1 HCRTR2
G_PROTEIN_COUPLED_RECEPTOR_ACTIVITY	185	120	0.648649	11	16.9064	7.04117e-10	1.63783e-07	GLP2R GPR24 TRHR GNRHR NPY MC3R MC4R MC5R SCTR GRPR HCRTR2
CYTOKINESandGROWTHFACTORS	449	279	0.621381	15	10.2766	7.29633e-10	1.63783e-07	AGRP FGF10 GAST GCG GNRH1 GRP IAPP NPFF NPY PMCH POMC PPY PYY SCT TRH
PLASMA_MEMBRANE	1393	895	0.642498	24	5.92451	2.95837e-09	6.30872e-07	GLP1R GLP2R GRPR HCRTR1 HCRTR2 NPY5R NPY1R NPY2R MEP1A MEP1B M6PR PPYR1 CPE GPR24 TRHR NPFFR2 ATP6AP2 CD200 MC1R MC3R MC4R MC5R GNRHR SCTR
RECEPTOR_BINDING	373	282	0.756032	14	9.20746	8.44653e-09	1.71545e-06	TRH AGRP NPY ASIP FGF10 NPFF PPY POMC REN GNRH1 PYY GAST PCSK1N GRP
SECOND_MESSENGER_MEDIATED_SIGNALING	146	118	0.808219	10	15.1654	9.87177e-09	1.91378e-06	GLP1R GLP2R NPY1R NPY2R GPR24 NPY MC1R MC3R MC4R MC5R
INTEGRAL_TO_PLASMA_MEMBRANE	963	585	0.607477	19	6.47886	1.20041e-08	2.22597e-06	GRPR HCRTR1 HCRTR2 NPY5R NPY1R NPY2R MEP1A MEP1B M6PR PPYR1 GPR24 TRHR NPFFR2 CD200 MC1R MC3R MC5R GNRHR SCTR
CDH24 EpiMod
Gene List	nList	nRep	fRep	nOVLAP	OR	pvalue	adjPval	Genes
V$HOXA3_01	11	7	0.636364	1	121.106	0.0103941	1	TXNRD1
V$ROAZ_01	10	8	0.8	1	103.879	0.0118709	1	PPP1R16A
REGULATION_OF_HOMEOSTATIC_PROCESS	13	10	0.769231	1	81.0332	0.0148185	1	GLRX2
KEGG_RIBOFLAVIN_METABOLISM	16	12	0.75	1	66.2386	0.0177582	1	PHPT1
REACTOME_SYNTHESIS_AND_INTERCONVERSION_OF_NUCLEOTIDE_DI_AND_TRIPHOSPHATES	18	12	0.666667	1	66.2386	0.0177582	1	TXNRD1
NAKAJIMA_EOSINOPHIL	21	13	0.619048	1	60.8723	0.019225	1	INDO
UROSEVIC_RESPONSE_TO_IMIQUIMOD	16	13	0.8125	1	60.8723	0.019225	1	INDO
BENPORATH_CYCLING_GENES	648	411	0.634259	3	6.39247	0.0202513	1	TXNRD1 INDO CDH24
HOFMANN_MYELODYSPLASTIC_SYNDROM_LOW_RISK_DN	25	17	0.68	1	45.6761	0.0250724	1	TXNRD1
DORN_ADENOVIRUS_INFECTION_12HR_DN	28	20	0.714286	1	38.5038	0.0294372	1	TXNRD1
CRMP1 EpiMod
Gene List	nList	nRep	fRep	nOVLAP	OR	pvalue	adjPval	Genes
MOOTHA_PGC	331	228	0.688822	6	7.39862	0.000376447	1	UBE2B NDUFV2 CRMP1 HSPE1 MRPS12 RTN4
MORF_HAT1	159	122	0.767296	4	8.74269	0.00178879	1	HSPE1 RTN4 LSM2 NDUFV2
KINASE_ACTIVITY	358	281	0.784916	5	4.74149	0.00669112	1	CSNK1G2 COL4A3BP TK1 GNE TSSK2
MORF_SOD1	254	189	0.744094	4	5.52602	0.00855979	1	NDUFV2 HSPE1 RTN4 LSM2
MORF_EI24	138	100	0.724638	3	7.72497	0.00901269	1	HSPE1 RTN4 LSM2
LINDGREN_BLADDER_CANCER_CLUSTER_3_UP	325	197	0.606154	4	5.29174	0.00987487	1	TFG RTN3 TK1 MRPS12
TRANSFERASE_ACTIVITY_TRANSFERRING_PHOSPHORUS_CONTAINING_GROUPS	413	314	0.760291	5	4.21574	0.0105744	1	COL4A3BP TSSK2 CSNK1G2 TK1 GNE
DACOSTA_UV_RESPONSE_VIA_ERCC3_TTD_UP	47	37	0.787234	2	13.9073	0.0110425	1	MRPS12 TRIM25
DACOSTA_UV_RESPONSE_VIA_ERCC3_UP	309	204	0.660194	4	5.10166	0.0111288	1	BTBD2 TK1 MRPS12 TRIM25
PRAMOONJAGO_SOX4_TARGETS_DN	51	38	0.745098	2	13.5211	0.0116246	1	MRPS12 LSM2
OLIG2 EpiMod
Gene List	nList	nRep	fRep	nOVLAP	OR	pvalue	adjPval	Genes
TRANSFAC	1418	908	0.640339	23	27.9564	2.10769e-16	8.98931e-13	CART1 ALX4 DLX5 EGR2 FOXD3 HHEX HOXA3 MEOX1 MEOX2 NKX2-2 OLIG2 PAX1 PAX3 POU3F1 POU3F3 POU3F4 POU5F1 PRRX2 SOX10 SOX11 SOX2 SOX8 UTF1
TRANSCRIPTION_FACTOR_ACTIVITY	341	248	0.727273	9	13.3714	2.63494e-07	0.000561901	HHEX FOXD3 CART1 POU3F1 POU3F3 PAX3 EGR2 POU3F4 POU5F1
module_123	240	188	0.783333	8	15.1467	4.15595e-07	0.000590837	MEOX1 OLIG2 CART1 POU3F1 EGR2 DLX5 POU3F4 PRRX2
TGGAAA_V$NFAT_Q4_01	1438	866	0.602225	14	7.11498	1.20582e-06	0.00128571	HOXA3 MEOX2 SOX2 SOX11 SOX10 FOXD3 MTX2 NKX2-2 POU3F3 MTX1 PAX1 PAX3 EGR2 POU3F4
MULTICELLULAR_ORGANISMAL_DEVELOPMENT	1040	698	0.671154	12	6.85209	5.3419e-06	0.00455664	HHEX MEOX2 MEOX1 SOX8 SOX11 NKX2-2 DLX5 CART1 POU3F3 PAX1 PAX3 EGR2
CATTGTYY_V$SOX9_B1	280	203	0.725	7	11.6002	1.00411e-05	0.00646012	HHEX MEOX1 OLIG2 NKX2-2 HOXA3 SOX2 PAX3
CENTRAL_NERVOUS_SYSTEM_DEVELOPMENT	122	77	0.631148	5	21.0032	1.06028e-05	0.00646012	NKX2-2 SOX8 POU3F3 EGR2 CART1
ANATOMICAL_STRUCTURE_DEVELOPMENT	1005	669	0.665672	11	6.21114	2.36702e-05	0.0126192	SOX8 SOX11 SOX10 NKX2-2 DLX5 CART1 POU3F3 PAX1 PAX3 EGR2 POU5F1
YNGTTNNNATT_UNKNOWN	275	167	0.607273	6	11.6374	3.79027e-05	0.0154377	NKX2-2 HOXA3 POU3F1 POU3F3 SOX2 SOX10
DNA_BINDING	588	454	0.772109	9	6.97726	3.86469e-05	0.0154377	FOXD3 HHEX CART1 POU3F1 POU3F3 PAX3 EGR2 POU3F4 POU5F1
V$RREB1_01	163	101	0.619632	5	15.7167	3.9816e-05	0.0154377	NKX2-2 HOXA3 MEOX2 POU3F3 MTX1
V$USF2_Q6	184	115	0.625	5	13.694	7.42591e-05	0.0263929	HHEX POU3F1 FOXD3 ALX4 IPO13
V$WHN_B	190	118	0.621053	5	13.3257	8.3966e-05	0.0275473	NKX2-2 HOXA3 POU3F3 PAX3 POU3F4
CONRAD_STEM_CELL	37	23	0.621622	3	42.1031	9.17313e-05	0.0279453	SOX2 POU5F1 UTF1
V$FOXO1_01	195	126	0.646154	5	12.4247	0.000114674	0.0298431	HHEX NKX2-2 HOXA3 SOX2 POU3F4
COLIN_PILOCYTIC_ASTROCYTOMA_VS_GLIOBLASTOMA_UP	34	25	0.735294	3	38.2825	0.000118503	0.0298431	SOX10 SOX8 OLIG2
V$GATA1_01	184	128	0.695652	5	12.2213	0.000123551	0.0298431	HHEX POU3F1 SOX2 PAX3 POU3F4
V$HFH1_01	196	129	0.658163	5	12.1218	0.000128183	0.0298431	HHEX FOXD3 SOX2 EGR2 POU3F4
V$LYF1_01	204	130	0.637255	5	12.0237	0.000132947	0.0298431	FOXD3 HOXA3 POU3F3 SOX2 ALX4
SYSTEM_DEVELOPMENT	855	573	0.670175	9	5.41093	0.000235247	0.0501664	SOX8 SOX11 NKX2-2 DLX5 CART1 POU3F3 PAX1 PAX3 EGR2
V$NKX22_01	144	88	0.611111	4	13.8231	0.000357384	0.0725829	HHEX NKX2-2 HOXA3 EGR2
module_220	328	256	0.780488	6	7.40104	0.000398908	0.0748764	MEOX1 CART1 POU3F1 EGR2 DLX5 PRRX2
AACTTT_UNKNOWN	1475	912	0.618305	11	4.37231	0.000403788	0.0748764	HOXA3 ALX4 SOX2 PRRX2 FOXD3 NKX2-2 POU3F1 POU3F3 EGR2 POU3F4 EIF1AX
TTGTTT_V$FOXO4_01	1549	938	0.605552	11	4.23266	0.000516617	0.0918071	HOXA3 MEOX2 MTX1 HHEX SOX2 FOXD3 NKX2-2 POU3F3 PAX3 EGR2 POU3F4
SHEPARD_BMYB_TARGETS	60	45	0.75	3	20.0332	0.00069349	0.118309	SOX11 POU3F1 POU3F3
SHEPARD_CRUSH_AND_BURN_MUTANT_DN	147	107	0.727891	4	11.2419	0.000751153	0.118495	POU3F1 POU3F3 OLIG2 SOX11
V$HNF1_C	177	108	0.610169	4	11.1326	0.000777929	0.118495	NKX2-2 HOXA3 POU3F3 FOXD3
V$TFIII_Q6	163	108	0.662577	4	11.1326	0.000777929	0.118495	NKX2-2 MEOX1 POU3F3 PAX1
V$FOXD3_01	165	110	0.666667	4	10.9201	0.000833502	0.122582	HHEX HOXA3 POU3F3 EGR2
V$CIZ_01	181	111	0.61326	4	10.8167	0.000862317	0.122593	NKX2-2 FOXD3 PAX1 DLX5
V$PAX4_04	164	114	0.695122	4	10.5207	0.000952992	0.124212	NKX2-2 MEOX2 POU3F3 PRRX2
V$NFY_01	187	115	0.614973	4	10.4239	0.000984658	0.124212	POU3F3 OLIG2 SOX2 PAX3
V$TITF1_Q3	184	115	0.625	4	10.4239	0.000984658	0.124212	HHEX NKX2-2 MEOX2 FOXD3
GCANCTGNY_V$MYOD_Q6	684	422	0.616959	7	5.31343	0.000990201	0.124212	HOXA3 IPO13 HHEX MTX1 SOX2 PAX1 EGR2
V$FOXM1_01	187	117	0.625668	4	10.2358	0.00105021	0.127975	HOXA3 MEOX2 DLX5 POU3F4
V$PPAR_DR1_Q2	190	119	0.626316	4	10.0546	0.00111878	0.128962	HHEX HOXA3 POU5F1 PRRX2
RRAGTTGT_UNKNOWN	183	119	0.650273	4	10.0546	0.00111878	0.128962	NKX2-2 SOX2 FOXD3 SOX11
V$HP1SITEFACTOR_Q6	178	120	0.674157	4	9.96827	0.00115422	0.129546	HHEX POU3F3 SOX2 FOXD3
V$CREBP1_Q2	189	122	0.645503	4	9.79288	0.00122747	0.134234	HHEX HOXA3 FOXD3 EGR2
AAANWWTGC_UNKNOWN	163	123	0.754601	4	9.70997	0.00126529	0.134911	HHEX HOXA3 OLIG2 PAX1
V$COUP_01	193	124	0.642487	4	9.62827	0.00130392	0.135639	HOXA3 DLX5 POU5F1 PRRX2
V$MAX_01	201	127	0.631841	4	9.39057	0.00142479	0.141319	HHEX MEOX2 FOXD3 IPO13
V$ER_Q6_02	204	127	0.622549	4	9.39057	0.00142479	0.141319	MTX2 HOXA3 SOX2 POU5F1
V$NF1_Q6	213	131	0.615023	4	9.08998	0.00159788	0.154885	NKX2-2 MTX1 SOX2 PAX3
V$SRF_C	175	133	0.76	4	8.94473	0.00168971	0.160147	NKX2-2 HOXA3 EGR2 POU3F4
V$EGR_Q6	212	134	0.632075	4	8.87762	0.00173699	0.161049	HHEX NKX2-2 HOXA3 EGR2
REACTOME_E2F_TRANSCRIPTIONAL_TARGETS_AT_G1_S	22	18	0.818182	2	33.8233	0.00219522	0.195902	SOX2 POU5F1
V$SRF_Q4	191	143	0.748691	4	8.29237	0.00220476	0.195902	NKX2-2 HOXA3 EGR2 POU3F4
V$ATF6_01	95	69	0.726316	3	12.7148	0.00240354	0.209206	NKX2-2 PAX1 EGR2
KEGG_MATURITY_ONSET_DIABETES_OF_THE_YOUNG	25	20	0.8	2	30.0709	0.00271284	0.231405	HHEX NKX2-2
SKELETAL_DEVELOPMENT	102	73	0.715686	3	11.9826	0.0028233	0.236105	PAX1 DLX5 CART1
GCTNWTTGK_UNKNOWN	232	156	0.672414	4	7.57108	0.00302513	0.245366	OLIG2 POU3F3 SOX2 PAX3
YTAAYNGCT_UNKNOWN	117	75	0.641026	3	11.648	0.0030491	0.245366	HHEX EGR2 POU5F1
V$XBP1_01	108	76	0.703704	3	11.4876	0.00316605	0.25006	NKX2-2 HOXA3 PAX1
V$SRF_Q6	211	160	0.758294	4	7.37348	0.00331465	0.255016	NKX2-2 HOXA3 EGR2 POU3F4
GGGTGGRR_V$PAX4_03	1009	670	0.664024	8	3.84663	0.00339428	0.255016	ALX4 HHEX MEOX2 SOX10 MTX1 POU3F4 POU5F1 EIF1AX
V$ARP1_01	125	78	0.624	3	11.1739	0.00340819	0.255016	HOXA3 DLX5 POU3F4
WWTAAGGC_UNKNOWN	120	81	0.675	3	10.7426	0.00379225	0.278861	NKX2-2 PAX3 POU3F4
ORGAN_DEVELOPMENT	567	401	0.707231	6	4.59077	0.00405448	0.293091	NKX2-2 DLX5 CART1 PAX1 PAX3 EGR2
ACTA1 EpiMod
Gene List	nList	nRep	fRep	nOVLAP	OR	pvalue	adjPval	Genes
REACTOME_REGULATION_OF_PYRUVATE_DEHYDROGENASE_COMPLEX	12	11	0.916667	8	236.744	5.21571e-14	2.2245e-10	PDK4 PDK2 PPM2C PDHB PDK1 PDHA1 DLAT PDHX
REACTOME_PYRUVATE_METABOLISM	18	15	0.833333	8	102.355	1.9558e-12	4.17073e-09	PDK4 PDK2 PPM2C PDHB PDK1 PDHA1 DLAT PDHX
REACTOME_STRIATED_MUSCLE_CONTRACTION	31	26	0.83871	9	47.9326	9.46064e-12	1.34499e-08	TNNT3 TNNT2 MYL1 TNNI3 TNNT1 TNNI1 TNNI2 TNNC1 MYBPC3
REACTOME_MUSCLE_CONTRACTION	51	43	0.843137	10	27.7538	5.38944e-11	5.07391e-08	TNNI3 TNNT1 TNNI1 TNNI2 TNNC1 MYBPC3 TNNT3 TNNT2 MYL1 MYLK
MOOTHA_PYR	8	8	1	6	260.738	7.13798e-11	5.07391e-08	PDK4 PPM2C PDHB PDK1 PDHA1 PDHX
MOOTHA_ROS	8	8	1	6	260.738	7.13798e-11	5.07391e-08	PDK4 PPM2C PDHB PDK1 PDHA1 PDHX
REACTOME_PYRUVATE_METABOLISM_AND_TCA_CYCLE	36	28	0.777778	8	35.7842	8.31468e-10	5.06602e-07	PDK4 PDK2 PDHB PDK1 PDHA1 PDHX PPM2C DLAT
GNF2_TTN	26	19	0.730769	7	51.5397	1.31127e-09	6.99071e-07	TNNT3 MYL1 SLN TNNT1 TNNI1 TNNI2 PYGM
ACTIN_CYTOSKELETON	127	103	0.811024	11	11.0195	3.37918e-08	1.60136e-05	LASP1 GAS2 CLIC5 ACTR1B TNNI3 TNNC1 MYO6 ACTA1 KLHL20 TNNT2 SPTBN2
EBAUER_MYOGENIC_TARGETS_OF_PAX3_FOXO1_FUSION	50	33	0.66	7	23.799	9.69548e-08	4.13512e-05	MYO10 TNNI1 TNNI2 TNNC1 TAGLN TNNT3 MYL1
CYTOSKELETAL_PROTEIN_BINDING	158	131	0.829114	11	8.41807	4.08461e-07	0.000158371	TRIM63 MYBPC3 PKD2L1 COTL1 TNNI3 TNNT1 TNNC1 MYO6 ACTA1 TNNT2 SPTBN2
module_201	50	38	0.76	6	16.367	5.26352e-06	0.00187074	TNNI2 PRKG1 ACTA1 TNNT3 PLN MYL1
CYTOSKELETON	361	284	0.786704	14	4.85003	6.45526e-06	0.00211782	LASP1 CLIC5 KIF23 MYO6 ACTA1 DNALI1 SPRR1A GAS2 ACTR1B TNNI3 TNNC1 KLHL20 TNNT2 SPTBN2
REGULATION_OF_MUSCLE_CONTRACTION	19	12	0.631579	4	42.6709	9.09783e-06	0.00277159	CNN1 TNNT1 TNNC1 MYBPC3
CYTOSKELETAL_PART	231	184	0.796537	11	5.79754	1.15651e-05	0.00328834	LASP1 KIF23 MYO6 ACTA1 DNALI1 GAS2 ACTR1B TNNI3 TNNC1 TNNT2 SPTBN2
SARCOMERE	14	14	1	4	34.1507	1.80609e-05	0.00481435	ACTA1 TNNI3 TNNC1 TNNT2
CELL_PROJECTION	105	71	0.67619	7	9.62781	2.08273e-05	0.00522521	DNALI1 CLIC5 USH1C FGD4 DFNB31 MYO6 MYO7A
EBAUER_TARGETS_OF_PAX3_FOXO1_FUSION_UP	206	130	0.631068	9	6.65989	2.39844e-05	0.00568297	TAGLN MYL1 MYO10 PYGM SLN TNNI1 TNNI2 TNNC1 TNNT3
MYOFIBRIL	19	18	0.947368	4	24.4062	5.32089e-05	0.0111639	ACTA1 TNNI3 TNNC1 TNNT2
REACTOME_INTEGRATION_OF_ENERGY_METABOLISM	229	144	0.628821	9	5.95813	5.39662e-05	0.0111639	PDHX PDK4 PDK2 PDHB PDK1 PDHA1 NDUFA1 PPM2C DLAT
module_512	37	35	0.945946	5	14.3851	5.5668e-05	0.0111639	ACTA1 TNNT3 PLN MYL1 TNNI2
CCAWWNAAGG_V$SRF_Q4	74	57	0.77027	6	10.246	5.75863e-05	0.0111639	MRVI1 TNNC1 TAGLN ACTA1 PLN MYLK
GNF2_MYL2	32	20	0.625	4	21.3415	8.27071e-05	0.0146977	TNNT2 TNNI3 TNNC1 MYBPC3
GNF2_MYL3	31	20	0.645161	4	21.3415	8.27071e-05	0.0146977	TNNT2 TNNI3 TNNC1 MYBPC3
MICROVILLUS	11	8	0.727273	3	50.5824	9.09671e-05	0.015519	USH1C CLIC5 DFNB31
CONTRACTILE_FIBER_PART	23	22	0.956522	4	18.9684	0.00012259	0.0201094	ACTA1 TNNI3 TNNC1 TNNT2
module_387	49	42	0.857143	5	11.6549	0.000136501	0.0202941	TNNI2 ACTA1 TNNT3 PLN MYL1
KEGG_BASAL_TRANSCRIPTION_FACTORS	36	23	0.638889	4	17.9728	0.000147037	0.0202941	GTF2A1 GTF2A2 GTF2F1 GTF2E2
BIOCARTA_NO1_PATHWAY	31	23	0.741935	4	17.9728	0.000147037	0.0202941	ACTA1 TNNI1 PRKG1 PRKG2
CONTRACTILE_FIBER	25	23	0.92	4	17.9728	0.000147037	0.0202941	ACTA1 TNNT2 TNNI3 TNNC1
CYTOSKELETON_ORGANIZATION_AND_BIOGENESIS	205	164	0.8	9	5.17518	0.000147507	0.0202941	LASP1 FGD4 KIF23 MYO6 ACTA1 VIL1 PRKG1 KLHL20 TNNT2
module_329	51	43	0.843137	5	11.3417	0.000153004	0.0203926	TNNI2 ACTA1 TNNT3 PLN MYL1
NON_MEMBRANE_BOUND_ORGANELLE	617	483	0.78282	16	3.20095	0.000181559	0.022775	USH1C KIF23 GAS2 SPTBN2 LASP1 CLIC5 MYO6 ACTA1 DNALI1 SPRR1A ACTR1B DFNB31 TNNI3 TNNC1 KLHL20 TNNT2
INTRACELLULAR_NON_MEMBRANE_BOUND_ORGANELLE	617	483	0.78282	16	3.20095	0.000181559	0.022775	USH1C KIF23 GAS2 SPTBN2 LASP1 CLIC5 MYO6 ACTA1 DNALI1 SPRR1A ACTR1B DFNB31 TNNI3 TNNC1 KLHL20 TNNT2
TGAYRTCA_V$ATF3_Q6	415	253	0.609639	11	4.10515	0.000211924	0.0258245	TAGLN PLN GTF2F1 JUB CCIN MYO7A SPRR1A SLN CNN1 ACTR1B CELSR3
TGACATY_UNKNOWN	515	322	0.625243	12	3.50744	0.000447787	0.0530503	TAGLN JUB SPTBN2 MYLK FGD4 MYO7A PDK4 PYGM SPRR1A SLN CNN1 CELSR3
REACTOME_HIV1_TRANSCRIPTION_INITIATION	39	31	0.794872	4	12.6408	0.000485384	0.0559503	GTF2A1 GTF2A2 GTF2F1 GTF2E2
ACTIN_FILAMENT_BASED_PROCESS	114	88	0.77193	6	6.34933	0.00063799	0.071606	VIL1 FGD4 MYO6 PRKG1 ACTA1 TNNT2
ACTIN_FILAMENT	18	15	0.833333	3	21.1064	0.000695196	0.0760259	GAS2 ACTA1 MYO6
ACTIN_BINDING	76	60	0.789474	5	7.82278	0.000739106	0.0788071	COTL1 TNNI3 MYO6 TNNT2 SPTBN2
V$SRF_C	175	133	0.76	7	4.85052	0.00106555	0.110844	MRVI1 TAGLN PLN MYLK CNN1 TNNC1 ACTA1
REN_ALVEOLAR_RHABDOMYOSARCOMA_UP	98	68	0.693878	5	6.82171	0.00130809	0.132833	TNNI1 TNNI2 TNNC1 TNNT3 TNNT2
KEGG_DILATED_CARDIOMYOPATHY	92	69	0.75	5	6.71466	0.00139704	0.138567	TNNI3 TNNC1 MYBPC3 PLN TNNT2
KAAB_HEART_ATRIUM_VS_VENTRICLE_DN	263	185	0.703422	8	3.96707	0.00167623	0.16248	MYBPC3 PLN PGM1 PDHX PDK4 TNNI3 TNNT1 TNNC1
DAVICIONI_TARGETS_OF_PAX_FOXO1_FUSIONS_DN	68	44	0.647059	4	8.52246	0.00185866	0.17616	GAS2 ITPR1 MYL1 PPM2C
MAGI2 EpiMod
Gene List	nList	nRep	fRep	nOVLAP	OR	pvalue	adjPval	Genes
REACTOME_OTHER_SEMAPHORIN_INTERACTIONS	16	11	0.6875	4	312.974	6.3039e-09	2.68861e-05	SEMA3E PLXNB3 SEMA4A PLXND1
REACTOME_SEMAPHORIN_INTERACTIONS	66	55	0.833333	4	43.967	6.12222e-06	0.0130556	SEMA4A PLXNB3 PLXND1 SEMA3E
REACTOME_AXON_GUIDANCE	161	127	0.78882	4	18.0749	0.000167512	0.238146	SEMA4A PLXNB3 PLXND1 SEMA3E
KEGG_AXON_GUIDANCE	129	97	0.751938	3	16.5387	0.00131051	1	SEMA4A PLXNB3 SEMA3E
TGACAGNY_V$MEIS1_01	620	394	0.635484	5	7.46428	0.00153523	1	EML1 AP4S1 SPOCK2 DLL1 SEMA4A
OSADA_ASCL1_TARGETS_UP	46	31	0.673913	2	33.5856	0.00223426	1	SEMA3E DLL1
GAANYNYGACNY_UNKNOWN	51	32	0.627451	2	32.4662	0.00237998	1	GRID2 SPOCK2
RTAAACA_V$FREAC2_01	714	446	0.62465	5	6.53455	0.00266105	1	EML1 GRID2 SPOCK2 AP4M1 MFNG
V$FOXO4_02	193	126	0.65285	3	12.5975	0.00277596	1	EML1 DLL1 AP4M1
KEGG_NOTCH_SIGNALING_PATHWAY	47	35	0.744681	2	29.517	0.00284345	1	DLL1 MFNG
ZNF96 EpiMod
Gene List	nList	nRep	fRep	nOVLAP	OR	pvalue	adjPval	Genes
AGGAGTG,MIR-483	59	40	0.677966	2	29.5662	0.00287813	1	RBAK OGT
V$CDP_01	67	41	0.61194	2	28.8085	0.00302217	1	CHD2 RREB1
GAGACTG,MIR-452	79	48	0.607595	2	24.3922	0.00412333	1	RSBN1 OGT
MORF_IKBKG	120	74	0.616667	2	15.5544	0.0095769	1	ZNF592 PPP1R10
MORF_PML	129	82	0.635659	2	13.9899	0.0116654	1	ZNF592 PPP1R10
GTCTTCC,MIR-7	138	85	0.615942	2	13.4697	0.0124961	1	RSBN1 OGT
ATP_DEPENDENT_DNA_HELICASE_ACTIVITY	11	7	0.636364	1	86.7822	0.0141507	1	CHD2
WGTTNNNNNAAA_UNKNOWN	425	261	0.614118	3	6.88015	0.014523	1	RREB1 CHD2 ADARB2
IIZUKA_LIVER_CANCER_PROGRESSION_L0_L1_UP	11	8	0.727273	1	74.4213	0.0161569	1	ZNF96
HO_LIVER_CANCER_VASCULAR_INVASION	13	8	0.615385	1	74.4213	0.0161569	1	ZNF687
ADARB2 EpiMod
Gene List	nList	nRep	fRep	nOVLAP	OR	pvalue	adjPval	Genes
AGGAGTG,MIR-483	59	40	0.677966	2	29.5662	0.00287813	1	RBAK OGT
V$CDP_01	67	41	0.61194	2	28.8085	0.00302217	1	CHD2 RREB1
GAGACTG,MIR-452	79	48	0.607595	2	24.3922	0.00412333	1	RSBN1 OGT
MORF_IKBKG	120	74	0.616667	2	15.5544	0.0095769	1	ZNF592 PPP1R10
MORF_PML	129	82	0.635659	2	13.9899	0.0116654	1	ZNF592 PPP1R10
GTCTTCC,MIR-7	138	85	0.615942	2	13.4697	0.0124961	1	RSBN1 OGT
ATP_DEPENDENT_DNA_HELICASE_ACTIVITY	11	7	0.636364	1	86.7822	0.0141507	1	CHD2
WGTTNNNNNAAA_UNKNOWN	425	261	0.614118	3	6.88015	0.014523	1	RREB1 CHD2 ADARB2
IIZUKA_LIVER_CANCER_PROGRESSION_L0_L1_UP	11	8	0.727273	1	74.4213	0.0161569	1	ZNF96
HO_LIVER_CANCER_VASCULAR_INVASION	13	8	0.615385	1	74.4213	0.0161569	1	ZNF687
IL1R1 EpiMod
Gene List	nList	nRep	fRep	nOVLAP	OR	pvalue	adjPval	Genes
KEGG_CYTOKINE_CYTOKINE_RECEPTOR_INTERACTION	267	213	0.797753	15	41.5508	1.32697e-16	5.65951e-13	CCL3 CCL4 CCL17 CCL22 CCL16 IL1R2 IL1A IL12B IL12RB2 IL12A CCR4 CCR8 CCL1 IL1RAP IL1R1
CYTOKINE_ACTIVITY	111	83	0.747748	9	46.3917	1.07541e-11	2.29331e-08	CCL3 CCL4 CCL17 CCL22 CCL16 IL12B IL12A CCL1 IL1RN
REACTOME_CHEMOKINE_RECEPTORS_BIND_CHEMOKINES	55	40	0.727273	7	73.4355	8.63324e-11	1.22736e-07	CCL3 CCL4 CCL17 CCR4 CCR8 CCL22 CCL16
BIOCARTA_NKT_PATHWAY	28	25	0.892857	6	104.6	2.84248e-10	3.0308e-07	CCL3 CCL4 IL12B IL12RB2 IL12A CCR4
BIOCARTA_IL1R_PATHWAY	33	30	0.909091	6	82.6269	9.40874e-10	8.02566e-07	TOLLIP IL1RAP IL1R1 IL1RN IRAK3 IL1A
CHEMOKINE_ACTIVITY	42	33	0.785714	6	73.5536	1.74156e-09	1.06111e-06	CCL3 CCL1 CCL4 CCL17 CCL22 CCL16
CHEMOKINE_RECEPTOR_BINDING	43	33	0.767442	6	73.5536	1.74156e-09	1.06111e-06	CCL3 CCL1 CCL4 CCL17 CCL22 CCL16
CYTOKINESandGROWTHFACTORS	449	279	0.621381	11	17.0761	2.25226e-09	1.20074e-06	CCL1 CCL16 CCL17 CCL22 CCL3 CCL4 IL12A IL12B IL1A IL1F10 IL1RN
RESPONSE_TO_EXTERNAL_STIMULUS	306	223	0.728758	10	18.5879	4.2407e-09	1.95873e-06	CCL3 CCL4 CCL17 CCL22 CCL16 IL1A CCR4 CCR8 CCL1 IL1RAP
LOCOMOTORY_BEHAVIOR	91	69	0.758242	7	39.0413	4.6459e-09	1.95873e-06	CCL3 CCL17 CCR4 CCR8 CCL22 CCL16 CCL1
G_PROTEIN_COUPLED_RECEPTOR_BINDING	54	39	0.722222	6	60.1451	5.05182e-09	1.95873e-06	CCL3 CCL4 CCL17 CCL22 CCL16 CCL1
KEGG_CHEMOKINE_SIGNALING_PATHWAY	190	140	0.736842	8	21.829	3.10401e-08	1.10322e-05	CCL3 CCL4 CCL17 CCL22 CCL16 CCR4 CCR8 CCL1
module_76	79	66	0.835443	6	33.0334	1.31258e-07	3.73258e-05	CCL3 CCL4 IL1A CCL17 IL1RAP IL1R1
EXTRACELLULAR_SPACE	239	169	0.707113	8	17.8334	1.35076e-07	3.73258e-05	CCL4 CCL22 IL1A PRG1 IL12B IL12A CCL1 IL1RN
DEFENSE_RESPONSE	264	169	0.640152	8	17.8334	1.35076e-07	3.73258e-05	CCL3 CCL4 CCL22 IL1A IL12B IL12A CCR4 IL1RAP
BEHAVIOR	149	112	0.751678	7	22.9463	1.40026e-07	3.73258e-05	CCL3 CCL17 CCL22 CCL16 CCR4 CCR8 CCL1
IMMUNE_RESPONSE	232	177	0.762931	8	16.9725	1.93243e-07	4.75607e-05	CCL4 CCL22 IL1R2 GZMA IL12B IL12A CCR4 CCR8
REACTOME_PEPTIDE_LIGAND_BINDING_RECEPTORS	173	118	0.682081	7	21.684	2.00725e-07	4.75607e-05	CCL3 CCL4 CCL17 CCL22 CCL16 CCR4 CCR8
RECEPTOR_BINDING	373	282	0.756032	9	12.2655	5.58442e-07	0.000119558	CCL3 CCL4 CCL17 CCL22 CCL16 IL12B IL12A CCL1 IL1RN
KEGG_TOLL_LIKE_RECEPTOR_SIGNALING_PATHWAY	102	84	0.823529	6	25.3621	5.60647e-07	0.000119558	CCL3 CCL4 TOLLIP IRAK4 IL12B IL12A
INFLAMMATORY_RESPONSE	124	91	0.733871	6	23.2596	9.02951e-07	0.000183385	CCL3 CCL4 IL1A CCL22 CCR4 IL1RAP
BUDHU_LIVER_CANCER_METASTASIS_DN	7	7	1	3	216.834	1.6963e-06	0.00032885	IL12B IL12A IL1A
EXTRACELLULAR_REGION_PART	332	239	0.71988	8	12.3166	1.91229e-06	0.000354605	CCL4 CCL22 IL1A PRG1 IL12B IL12A CCL1 IL1RN
IMMUNE_SYSTEM_PROCESS	326	246	0.754601	8	11.9378	2.37591e-06	0.00042222	CCL4 CCL22 IL1R2 GZMA IL12B IL12A CCR4 CCR8
IL-7	67	61	0.910448	5	28.219	2.77728e-06	0.000473805	CCL16 CCL17 CCL22 CCL4 CCL3
RESPONSE_TO_CHEMICAL_STIMULUS	306	188	0.614379	7	13.1856	4.69288e-06	0.000769812	CCL3 CCL17 CCL22 CCL16 CCR4 CCR8 CCL1
REACTOME_CLASS_A1_RHODOPSIN_LIKE_RECEPTORS	292	192	0.657534	7	12.894	5.39608e-06	0.000852381	CCL3 CCL4 CCL17 CCL22 CCL16 CCR4 CCR8
KEGG_APOPTOSIS	88	74	0.840909	5	22.8963	7.26935e-06	0.00110728	IRAK4 IL1A IL1RAP IL1R1 IRAK3
EXTRACELLULAR_REGION	439	300	0.683371	8	9.66029	1.03843e-05	0.00152721	CCL4 CCL22 IL1A IL12B IL12A IL1RN PRG1 CCL1
RESPONSE_TO_WOUNDING	185	140	0.756757	6	14.6697	1.12001e-05	0.00154254	CCL3 CCL4 IL1A CCL22 CCR4 IL1RAP
module_263	43	38	0.883721	4	35.7001	1.12119e-05	0.00154254	CCL3 CCL4 IL1A CCL17
module_75	391	312	0.797954	8	9.26373	1.38452e-05	0.00184531	CCL3 CCL4 CCL17 IL1A GZMA IL1RAP IL1R1 CCL1
module_46	386	314	0.813472	8	9.20066	1.45076e-05	0.001875	CCL3 CCL4 CCL17 IL1A GZMA IL1RAP IL1R1 CCL1
module_108	52	43	0.826923	4	31.145	1.85022e-05	0.00232094	CCL3 CCL4 IL1A CCL17
BIOCARTA_NO2IL12_PATHWAY	17	15	0.882353	3	72.9287	2.16075e-05	0.00263303	IL12B IL12RB2 IL12A
BIOCARTA_TH1TH2_PATHWAY	19	17	0.894737	3	62.4916	3.21287e-05	0.00380636	IL12B IL12RB2 IL12A
TH1 Cytokines and Related Genes	22	18	0.818182	3	58.345	3.84565e-05	0.00443289	IL12B IL12RB2 TBX21
REACTOME_GPCR_LIGAND_BINDING	392	264	0.673469	7	9.19209	4.30526e-05	0.00473843	CCL3 CCL4 CCL17 CCL22 CCL16 CCR4 CCR8
BIOCARTA_CYTOKINE_PATHWAY	21	19	0.904762	3	54.6664	4.55511e-05	0.00473843	IL12B IL12A IL1A
BIOCARTA_IL12_PATHWAY	23	19	0.826087	3	54.6664	4.55511e-05	0.00473843	IL12B IL12RB2 IL12A
module_73	21	19	0.904762	3	54.6664	4.55511e-05	0.00473843	IL1RAP IL1R2 IL1R1
module_64	506	378	0.747036	8	7.54205	5.54056e-05	0.0056263	CCL3 CCL4 CCL17 IL1A IL1RAP IL1R1 CCR8 CCL1
INTERLEUKIN_BINDING	24	21	0.875	3	48.6161	6.2204e-05	0.00607638	IL12RB2 IL12A IL1R1
CELL_CELL_SIGNALING	400	280	0.7	7	8.63473	6.26872e-05	0.00607638	CCL3 CCL4 CCL17 CCL22 CCL16 TBX3 TOLLIP
module_92	146	116	0.794521	5	14.1619	6.48581e-05	0.0061471	CCL3 CCL4 IL1A CCL17 CCL22
TH2 Cytokines and Related Genes	29	24	0.827586	3	41.7028	9.3943e-05	0.00869754	CCR4 IL1R1 IL1R2
KEGG_LEISHMANIA_INFECTION	72	65	0.902778	4	19.8699	9.58463e-05	0.00869754	IRAK4 IL12B IL12A IL1A
BIOCARTA_INFLAM_PATHWAY	29	26	0.896552	3	38.0828	0.000120066	0.0106683	IL12B IL12A IL1A
CELLULAR_CATION_HOMEOSTASIS	101	72	0.712871	4	17.8191	0.000143008	0.0124476	CCL3 CCR4 CCR8 CCL1
BASSO_CD40_SIGNALING_UP	101	74	0.732673	4	17.3017	0.000159112	0.0133062	CCL3 CCL4 PRG1 CCL22
RESPONSE_TO_BIOTIC_STIMULUS	117	74	0.632479	4	17.3017	0.000159112	0.0133062	CCL4 CCL22 IL12B IL12A
CATION_HOMEOSTASIS	104	75	0.721154	4	17.0562	0.000167639	0.0137496	CCL3 CCR4 CCR8 CCL1
module_496	6	6	1	2	139.584	0.0002064	0.0166093	IL1RAP IL1R1
module_84	531	346	0.651601	7	6.8901	0.000236402	0.0185199	CCL3 CCL4 GZMA IL1RAP IL1R1 IL1RN PRG1
OSWALD_HEMATOPOIETIC_STEM_CELL_IN_COLLAGEN_GEL_UP	231	154	0.666667	5	10.4976	0.000247493	0.0185199	CCL4 IL1R2 IL1A IL12A IL1RN
OSWALD_HEMATOPOIETIC_STEM_CELL_IN_COLLAGEN_GEL_DN	231	154	0.666667	5	10.4976	0.000247493	0.0185199	CCL4 IL1R2 IL1A IL12A IL1RN
VIRAL_REPRODUCTION	41	33	0.804878	3	29.1924	0.000247511	0.0185199	CCL3 CCL1 CCL4
KEGG_TYPE_I_DIABETES_MELLITUS	44	34	0.772727	3	28.2519	0.000270775	0.0199113	IL12B IL12A IL1A
POSITIVE_REGULATION_OF_DEFENSE_RESPONSE	10	7	0.7	2	112.125	0.000288281	0.0208393	IL12B IL12A
ION_HOMEOSTASIS	124	88	0.709677	4	14.3989	0.000310904	0.0221001	CCL3 CCR4 CCR8 CCL1
CELLULAR_HOMEOSTASIS	141	90	0.638298	4	14.0615	0.000338904	0.0236955	CCL3 CCR4 CCR8 CCL1
RESPONSE_TO_STRESS	497	372	0.748491	7	6.37511	0.000368831	0.025372	CCL3 CCL4 CCL22 HMGB2 IL1A IL1RAP CCR4
SEIKE_LUNG_CANCER_POOR_SURVIVAL	9	8	0.888889	2	93.4251	0.000383472	0.0259604	IL12A IL1A
CYTOKINE_BINDING	46	42	0.913043	3	22.4359	0.000509019	0.0339213	IL1R1 IL12RB2 IL12A
CHEMICAL_HOMEOSTASIS	150	105	0.7	4	11.9508	0.000609704	0.039639	CCL3 CCR4 CCR8 CCL1
POSITIVE_REGULATION_OF_CELL_ADHESION	13	10	0.769231	2	70.095	0.000613405	0.039639	IL12B IL12A
LINDSTEDT_DENDRITIC_CELL_MATURATION_A	54	46	0.851852	3	20.3509	0.000666274	0.0424128	CCL4 IL12B IL1RN
BIOCARTA_SET_PATHWAY	11	11	1	2	62.3484	0.000747958	0.0469124	HMGB2 GZMA
REGULATION_OF_IMMUNE_EFFECTOR_PROCESS	15	12	0.8	2	56.1474	0.000895444	0.0553488	IL12B IL12A
RUTELLA_RESPONSE_TO_CSF2RB_AND_IL4_UP	337	211	0.626113	5	7.53506	0.00104778	0.0623278	CCL17 CCL22 IL1R2 IL1A IL1R1
BIOCARTA_ERYTH_PATHWAY	15	13	0.866667	2	51.0166	0.00105577	0.0623278	CCL3 IL1A
INTERFERON_GAMMA_PRODUCTION	14	13	0.928571	2	51.0166	0.00105577	0.0623278	IL12B IL12A
RESPONSE_TO_OTHER_ORGANISM	81	54	0.666667	3	17.1445	0.00106681	0.0623278	CCL4 IL12A CCL22
IL-2	628	448	0.713376	7	5.21978	0.00112521	0.0648514	CCL3 CCR8 IL12RB2 GZMA IL1R1 CCL4 IL1RAP
module_545	19	14	0.736842	2	46.7918	0.00122884	0.0680652	IL1RAP IL1R1
REGULATION_OF_DEFENSE_RESPONSE	20	14	0.7	2	46.7918	0.00122884	0.0680652	IL12B IL12A
POSITIVE_REGULATION_OF_CYTOKINE_PRODUCTION	15	14	0.933333	2	46.7918	0.00122884	0.0680652	IL12B IL12A
BASSO_HAIRY_CELL_LEUKEMIA_DN	80	58	0.725	3	15.8892	0.0013137	0.0718325	IL1R2 S100A13 IL1R1
CYTOKINE_PRODUCTION	72	59	0.819444	3	15.6042	0.00138057	0.0744833	IL12B IL12A PRG1
REACTOME_MYD88_CASCADE	19	15	0.789474	2	43.2309	0.00141457	0.0744833	IRAK3 IRAK4
Th17 Chemokines	16	15	0.9375	2	43.2309	0.00141457	0.0744833	CCL1 CCL22
module_375	84	62	0.738095	3	14.8075	0.00159394	0.0814666	CCL3 CCL17 CCR8
VIPR2 EpiMod
Gene List	nList	nRep	fRep	nOVLAP	OR	pvalue	adjPval	Genes
REACTOME_CLASS_B2_SECRETIN_FAMILY_RECEPTORS	85	61	0.717647	17	553.143	8.75347e-33	3.73336e-29	ADCYAP1 ADCYAP1R1 PTCH2 PTHR1 PTHLH IHH SMO SHH ADM RAMP2 SCT SCTR DHH PTCH VIPR2 VIPR1 VIP
REACTOME_GPCR_LIGAND_BINDING	392	264	0.673469	17	97.4501	3.4863e-21	7.43453e-18	SHH ADCYAP1 ADCYAP1R1 PTCH2 ADM DHH IHH PTHR1 PTHLH SMO RAMP2 PTCH VIPR2 VIPR1 VIP SCT SCTR
REACTOME_G_ALPHA_S_SIGNALLING_EVENTS	126	79	0.626984	11	106.697	6.62129e-17	9.41327e-14	PTHR1 PTHLH VIPR2 VIPR1 VIP ADCYAP1 ADCYAP1R1 ADM RAMP2 SCT SCTR
REACTOME_GLUCAGON_TYPE_LIGAND_RECEPTORS	33	21	0.636364	7	240.234	8.21477e-14	8.759e-11	ADCYAP1 ADCYAP1R1 SCT SCTR VIPR2 VIPR1 VIP
KEGG_HEDGEHOG_SIGNALING_PATHWAY	56	40	0.714286	8	129.132	1.07381e-13	9.15961e-11	HHIP PTCH2 GAS1 IHH SMO SHH DHH PTCH
REACTOME_DOWNSTREAM_EVENTS_IN_GPCR_SIGNALING	448	310	0.691964	11	23.5655	2.82114e-10	2.00536e-07	ADCYAP1 ADCYAP1R1 ADM PTHR1 PTHLH RAMP2 VIPR2 VIPR1 VIP SCT SCTR
KEGG_BASAL_CELL_CARCINOMA	55	44	0.8	5	54.883	1.45819e-07	8.88453e-05	HHIP PTCH2 SMO SHH PTCH
Hedgehog	20	19	0.95	4	107.334	2.23188e-07	0.000118987	HHIP IHH SMO PTCH2
PLASMA_MEMBRANE_PART	1141	705	0.617879	11	9.59329	1.47989e-06	0.000701303	SHH GPC3 PTCH ADCYAP1R1 PTCH2 GAS1 RAMP2 MME VIPR2 VIPR1 SCTR
INTRINSIC_TO_PLASMA_MEMBRANE	977	590	0.603889	10	9.72919	2.65082e-06	0.00113057	GPC3 PTCH ADCYAP1R1 PTCH2 GAS1 RAMP2 MME VIPR2 VIPR1 SCTR
MEMBRANE_PART	1633	982	0.601347	12	7.89538	5.18155e-06	0.00200903	SHH PTCH ADCYAP1R1 PTCH2 VIPR2 VIPR1 SCTR GPC3 SMO GAS1 RAMP2 MME
BIOCARTA_SHH_PATHWAY	16	14	0.875	3	104.582	8.20154e-06	0.00291496	SHH PTCH SMO
CELL_CELL_SIGNALING	400	280	0.7	7	12.0944	1.09855e-05	0.0036041	SHH ADCYAP1 ADM PTHLH MME VIPR2 VIPR1
PLASMA_MEMBRANE	1393	895	0.642498	11	7.31933	1.56049e-05	0.00475394	SHH GPC3 PTCH ADCYAP1R1 PTCH2 GAS1 RAMP2 MME VIPR2 VIPR1 SCTR
INTEGRAL_TO_PLASMA_MEMBRANE	963	585	0.607477	9	8.14406	2.26379e-05	0.0064367	GPC3 PTCH ADCYAP1R1 PTCH2 RAMP2 MME VIPR2 VIPR1 SCTR
MEMBRANE	1942	1200	0.61792	12	6.22795	4.25386e-05	0.0113392	SHH PTCH ADCYAP1R1 PTCH2 VIPR2 VIPR1 SCTR GPC3 SMO GAS1 RAMP2 MME
HORMONE_ACTIVITY	44	33	0.75	3	38.3618	0.000118499	0.0297294	ADCYAP1 PTHLH VIP
SCHLESINGER_METHYLATED_IN_COLON_CANCER	10	7	0.7	2	145.092	0.000176651	0.0418564	IHH HHIP
REACTOME_CALCITONIN_LIKE_LIGAND_RECEPTORS	10	8	0.8	2	120.851	0.000235109	0.0501369	ADM RAMP2
SECRETIN_LIKE_RECEPTOR_ACTIVITY	10	8	0.8	2	120.851	0.000235109	0.0501369	VIPR1 SCTR
KEGG_NEUROACTIVE_LIGAND_RECEPTOR_INTERACTION	272	204	0.75	5	10.5669	0.000276008	0.0560558	PTHR1 ADCYAP1R1 VIPR2 VIPR1 SCTR
NEUROPEPTIDE_HORMONE_ACTIVITY	12	9	0.75	2	104.076	0.000301736	0.0584957	ADCYAP1 VIP
module_92	146	116	0.794521	4	14.3567	0.000340971	0.0632279	VIPR1 VIP ADM SCTR
CYCLIC_NUCLEOTIDE_METABOLIC_PROCESS	11	10	0.909091	2	90.9236	0.000376489	0.0669053	ADM PTHLH
HOFMANN_MYELODYSPLASTIC_SYNDROM_HIGH_RISK_DN	15	11	0.733333	2	80.8959	0.000459323	0.072556	DHH PTCH
BIOCARTA_PTC1_PATHWAY	11	11	1	2	80.8959	0.000459323	0.072556	SHH PTCH
EMBRYONIC_MORPHOGENESIS	17	11	0.647059	2	80.8959	0.000459323	0.072556	SHH PTCH
G_PROTEIN_COUPLED_RECEPTOR_PROTEIN_SIGNALING_PATHWAY	326	231	0.708589	5	9.2709	0.00049037	0.0746938	PTHLH ADCYAP1 VIPR1 VIP SCTR
module_176	227	144	0.634361	4	11.4396	0.00077434	0.113881	ADCYAP1R1 GAS1 GPC3 SCTR
RECEPTOR_ACTIVITY	572	413	0.722028	6	6.39897	0.00102697	0.146002	ADCYAP1R1 SMO PTCH VIPR2 VIPR1 SCTR
BIOCARTA_VIP_PATHWAY	27	18	0.666667	2	45.6361	0.0012617	0.171643	VIPR2 VIP
module_112	257	165	0.642023	4	9.92093	0.00128782	0.171643	ADCYAP1R1 GAS1 GPC3 SCTR
KEGG_PATHWAYS_IN_CANCER	328	289	0.881098	5	7.31776	0.001354	0.174994	HHIP SMO SHH PTCH2 PTCH
G_PROTEIN_SIGNALING_ADENYLATE_CYCLASE_ACTIVATING_PATHWAY	25	20	0.8	2	40.5941	0.00156116	0.195834	ADCYAP1 PTHLH
LI_CISPLATIN_RESISTANCE_DN	34	21	0.617647	2	38.4529	0.00172238	0.206345	ADM GPC3
G_PROTEIN_SIGNALING_COUPLED_TO_CYCLIC_NUCLEOTIDE_SECOND_MESSENGER	98	82	0.836735	3	14.5255	0.00174974	0.206345	PTHLH VIPR1 ADCYAP1
